# Supplementary material
Source: PubMed Central journal article supplement (PMC4793151)
Supplement: NIHMS751540-supplement-Supp_2.pdf [file NIHMS751540-supplement-Supp_2.pdf]

# Cell Host & Microbe

## Structural Insight into Polymorphic ABO Glycan Binding by *Helicobacter pylori*

### Graphical Abstract

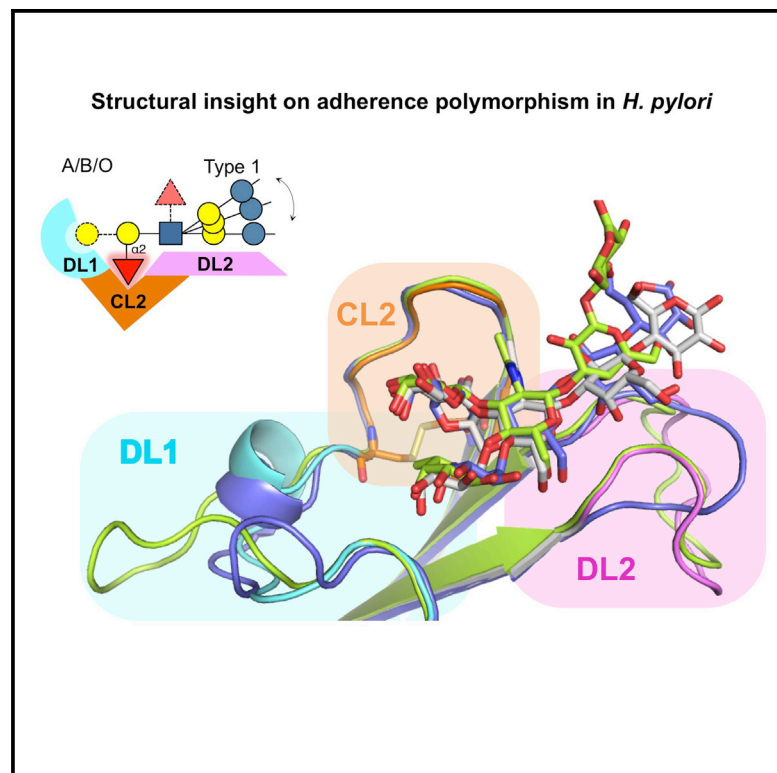

### Authors

Kristof Moonens, Pär Gideonsson, Suresh Subedi, ..., Serge Muyldermans, Thomas Borén, Han Remaut

### Correspondence

thomas.boren@umu.se (T.B.), han.remaut@vib-vub.be (H.R.)

### In Brief

*Helicobacter pylori* binds ABO/ Le<sup>b</sup> blood group antigens to persist in the stomach mucosa. Moonens et al. provide structural and mechanistic insight into the functional polymorphism in ABO blood group binding preference of the *H. pylori* adhesin BabA and show its binding activity is susceptible to the redox-active pharmaceutical N-acetylcysteine.

### Highlights

- Structural basis for *Helicobacter pylori*'s polymorphic ABO/ Le<sup>b</sup> glycan binding
- A disulfide-clasped fucose binding loop directs BabA adherence
- Redox-active pharmaceuticals block BabA-dependent binding and mucosal inflammation
- Single amino acid substitutions can alter BabA's blood group binding preferences

# Structural Insight into Polymorphic ABO Glycan Binding by *Helicobacter pylori*

Kristof Moonens,<sup>1,2,12</sup> Pär Gideonsson,<sup>3,12</sup> Suresh Subedi,<sup>1,2</sup> Jeanna Bugaytsova,<sup>3</sup> Ema Romaõ,<sup>4</sup> Melissa Mendez,<sup>3</sup> Jenny Nordén,<sup>3</sup> Mahsa Fallah,<sup>3</sup> Lena Rakhimova,<sup>3</sup> Anna Shevtsova,<sup>3</sup> Martina Lahmann,<sup>5</sup> Gaetano Castaldo,<sup>1,2</sup> Kristoffer Brännström,<sup>3</sup> Fanny Coppens,<sup>1,2</sup> Alvin W. Lo,<sup>1,2</sup> Tor Ny,<sup>3</sup> Jay V. Solnick,<sup>6,7</sup> Guy Vandenbussche,<sup>8</sup> Stefan Oscarson,<sup>9</sup> Lennart Hammarström,<sup>10</sup> Anna Arnqvist,<sup>3</sup> Douglas E. Berg,<sup>11</sup> Serge Muyldermans,<sup>4</sup> Thomas Borén,<sup>3,13,\*</sup> and Han Remaut<sup>1,2,13,\*</sup>

<sup>1</sup>Structural and Molecular Microbiology, Structural Biology Research Center, VIB, Pleinlaan 2, 1050 Brussels, Belgium

<sup>2</sup>Structural Biology Brussels, Vrije Universiteit Brussel, Pleinlaan 2, 1050 Brussels, Belgium

<sup>3</sup>Department of Medical Biochemistry and Biophysics, Umeå University, SE-901 87, Umeå, Sweden

<sup>4</sup>Cellular and Molecular Immunology, Vrije Universiteit Brussel, Pleinlaan 2, 1050 Brussels, Belgium

<sup>5</sup>School of Chemistry, Bangor University, Deiniol Road Bangor, Gwynedd LL57 2UW, UK

<sup>6</sup>Center for Comparative Medicine and California National Primate Research Center, University of California, Davis, Davis, CA 95616, USA

<sup>7</sup>Department of Medicine and Department of Microbiology and Immunology, School of Medicine, University of California, Davis, Sacramento, CA 95817, USA

<sup>8</sup>Structure and Function of Biological Membranes, Université Libre de Bruxelles, Triomflaan, 1050 Brussels, Belgium

<sup>9</sup>Centre for Synthesis and Chemical Biology, School of Chemistry, University College Dublin, Belfield, Dublin 4, Ireland

<sup>10</sup>Division of Clinical Immunology, Karolinska Institute at Karolinska University Hospital, 141 86 Huddinge, Sweden

<sup>11</sup>Department of Medicine, University of California, San Diego, La Jolla, CA 92093, USA

<sup>12</sup>Co-first author

<sup>13</sup>Co-senior author

\*Correspondence: [thomas.boren@umu.se](mailto:thomas.boren@umu.se) (T.B.), [han.remaut@vib-vub.be](mailto:han.remaut@vib-vub.be) (H.R.)

<http://dx.doi.org/10.1016/j.chom.2015.12.004>

## SUMMARY

The *Helicobacter pylori* adhesin BabA binds mucosal ABO/Le<sup>b</sup> blood group (bg) carbohydrates. BabA facilitates bacterial attachment to gastric surfaces, increasing strain virulence and forming a recognized risk factor for peptic ulcers and gastric cancer. High sequence variation causes BabA functional diversity, but the underlying structural-molecular determinants are unknown. We generated X-ray structures of representative BabA isoforms that reveal a polymorphic, three-pronged Le<sup>b</sup> binding site. Two diversity loops, DL1 and DL2, provide adaptive control to binding affinity, notably ABO versus O bg preference. *H. pylori* strains can switch bg preference with single DL1 amino acid substitutions, and can coexpress functionally divergent BabA isoforms. The anchor point for receptor binding is the embrace of an ABO fucose residue by a disulfide-clasped loop, which is inactivated by reduction. Treatment with the redox-active pharmaceutical N-acetylcysteine lowers gastric mucosal neutrophil infiltration in *H. pylori*-infected Le<sup>b</sup>-expressing mice, providing perspectives on possible *H. pylori* eradication therapies.

## INTRODUCTION

The gastric pathogen *H. pylori* chronically infects more than half of all people, leaving all infected with histological gastritis, and a

subset of individuals with peptic ulcer disease, or gastric cancer, one of the most frequently lethal malignancies in many societies (Peek and Blaser, 2002; Polk and Peek, 2010). Chronic gastritis is associated with extensive gastric mucosal leucocyte infiltration (Rautelin et al., 1993). Yet neither strong immune response nor the stomach acidity clears established infections. This emphasizes *H. pylori*'s extraordinary adaptation and adherence tropism for the gastric epithelium and overlying mucus layer, a niche hostile to most other microbes. *H. pylori*'s ability to attach to the glycosylated gastric epithelial cell surfaces and overlying mucins facilitates host response management and acquisition of nutrients leached from the epithelium, and is directed by members of the “*H. pylori* outer membrane protein” family (“Hops”; pfam: PF01856; Alm et al., 2000). A prominent role is taken by the BabA adhesin, which binds to mono-(ABO) and difucosylated (Lewis b; Le<sup>b</sup>) derivatives of the type 1 chain lacto series carbohydrates (glycans) present at high density in glycolipids, glycoproteins, and mucins of the gastrointestinal (GI) tract (Ilver et al., 1998; Aspholm-Hurtig et al., 2004) (see Table S1 available online). In particular, tight BabA-mediated adherence is linked to disease-associated strains (Gerhard et al., 1999; Prinz et al., 2001), presumably because it potentiates delivery of secreted virulence effectors such as VacA and CagA, whose interference with host tissue signaling pathways results in tissue damage or worse, neoplastic transformation (reviewed by Hatakeyama and Higashi, 2005; Posselt et al., 2013). An important component of *H. pylori*'s physiology is its increased genetic diversity (Kang and Blaser, 2006), with a particularly high rate of adaptive evolution in the BabA adhesin, where the high sequence diversity among clinical isolates functionally affects binding properties such as the ABO versus O binding preference (generalist versus specialist) and possibly

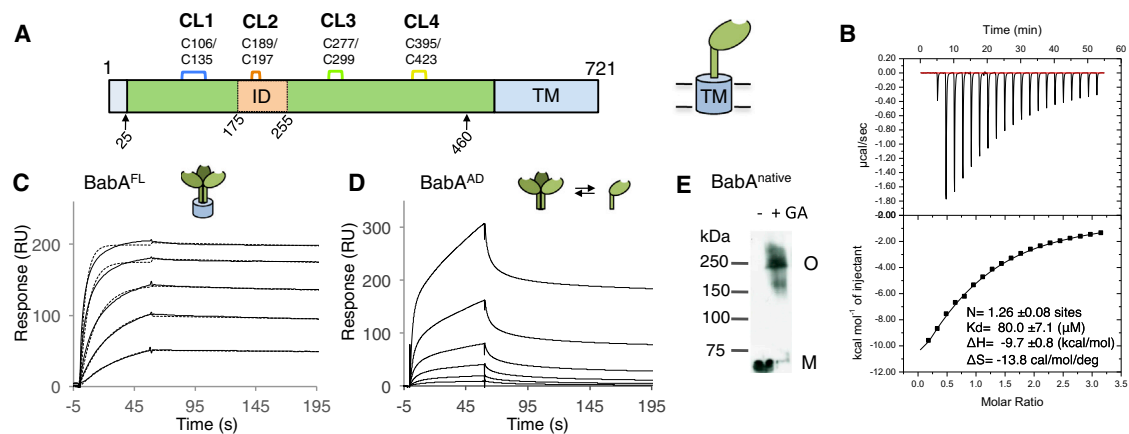

**Figure 1. BabA<sup>AD</sup> Interacts with Lewis b by Antigens**

(A) Schematic of the BabA architecture. Arrows indicate the aa 25–460 BabA adhesin domain fragment (BabA<sup>AD</sup>). Abbreviations: CL, cysteine-clasped loops; TM, predicted transmembrane domain; ID, Bab insertion domain (Figures S2 and S3). (B) ITC injection heats (upper) and normalized binding isotherm (lower) of the BabA<sup>AD</sup> titrated with Le<sup>b</sup><sub>5</sub>. (C) SPR sensorgram of full-length BabA (solid and dashed lines show raw and fitted binding curves, respectively, for 500, 250, 125, 62.5, 31.3, and 15.7 nM BabA, from the top down; with a dissociation constant  $K_d = 3.9E-10 \pm 0.9E-10$  (M), an association rate constant  $k_a = 6.1E5 \pm 1.4E5$  ( $M^{-1} s^{-1}$ ), and slow dissociation rate constant,  $k_d = 2.3E-4 \pm 0.8E-4$  ( $s^{-1}$ ). (D) Similar SPR sensorgram of purified BabA<sup>AD</sup> binding to a Le<sup>b</sup>-coated chip; [BabA] as in (C). (E) Immunoblot detection of BabA from glutaraldehyde (GA) crosslinked *H. pylori* 17875/Leb bacterial cells; M, monomer, O, BabA oligomer. See also Figure S1.

also the 1,000-fold range of affinities of *H. pylori* strains for their Le<sup>b</sup> glycan receptors ( $K_a \sim 10^8$  to  $10^{11}$   $M^{-1}$ ) (Aspholm-Hurtig et al., 2004). This promotes emergence of highly individualized *H. pylori* strain variants that likely contribute to the extreme longevity of established infections and directs the infection and disease outcome (reviewed by Kang and Blaser, 2006; Su-erbaum and Josenhans, 2007). BabA's adaptive traits are exemplified in the emergence of blood group *specialist* and *generalist* strains in accord with geographic differences in blood group prevalence (Aspholm-Hurtig et al., 2004), where the former are restricted to binding of Le<sup>b</sup> and are found in bg O dominant populations such as South American Amerindians, while the latter bind Le<sup>b</sup> as well as its GalNAc- and Gal-substituted blood group A and B derivatives (i.e., ALe<sup>b</sup> and BLe<sup>b</sup>). Though the multiple sequence analysis of BabA isoforms point to regions under positive, diversifying selection (Aspholm-Hurtig et al., 2004), the structural-molecular determinants that underlie BabA polymorphism are currently unknown.

Here we report X-ray structures of the adhesin domain of four representative BabA isoforms, including bg O specialist and bg A/B/O generalist type BabA proteins, alone and in complex with cognate ABO/Le<sup>b</sup>-type glycan receptors to establish a structural framework in which to understand the adhesin's extensive sequence diversity in functional and evolutionary contexts. We find a structurally plastic binding site that allows fast functional modification, illustrated by our finding that *H. pylori* can switch in ABO versus O bg binding preference by single amino acid substitutions in its carbohydrate binding domain (CBD). The anchor point for receptor binding is the embrace of the ABO fucose residue by a disulfide-clasped loop, which can be inactivated by the redox-active pharmaceutical N-acetylcysteine. This provides alternative perspectives on its possible pharmacological action and suggestions for improved treatment strategies.

## RESULTS

### BabA Attains High-Affinity ABO by Antigen Binding by Oligomerization

Secondary structure predictions indicate an autotransporter-like architecture for BabA, with a ~50 kDa  $\alpha$ -helical domain located upstream of a C-terminal  $\beta$  sheet region that is thought to form the transmembrane domain (residues 524–721) (Figure 1A). We previously found that residues 25–460 of the mature 721 residue BabA formed a stable, crystallizable fragment (hereafter dubbed BabA adhesin domain or BabA<sup>AD</sup>) (Subedi et al., 2014). Isothermal titration calorimetry (ITC) showed strain 17875 BabA<sup>AD</sup> bound Le<sup>b</sup>, with a monovalent binding interaction with a low micromolar dissociation constant ( $K_d$ ) of  $80.0 \pm 7.1$   $\mu M$  (Figure 1B). This is in sharp contrast to the generally high Le<sup>b</sup> binding affinities reported for most *H. pylori* strains ( $K_d \sim 10^{-8}$  to  $10^{-11}$   $M^{-1}$ ; Aspholm-Hurtig et al., 2004) and the 0.39 nM  $K_d$  here measured for the full-length protein by means of surface plasmon resonance (SPR) (Figure 1C). Comparative binding studies and cross-linking data demonstrated BabA attains its high binding affinity by means of oligomerization in presence of the transmembrane domain (Figures 1C–E). Whereas full-length BabA showed a single, exceedingly slow dissociation rate constant ( $2.32 E-4 s^{-1}$ ), as also reported by (Younson et al., 2009), the BabA<sup>AD</sup> shows biphasic dissociation kinetics composed of a similarly slow as well as a fast dissociating species (Figures 1C and 1D). Cross-linking in *H. pylori* outer membranes identified native BabA in 250 kDa oligomeric (presumably trimeric) complexes (Figure 1E). In contrast, BabA<sup>AD</sup> was found as a monomer with fast dissociation kinetics, and a minor fraction of a slow-dissociating oligomer (Figure S1A). Thus, full-length BabA's high apparent affinity for Le<sup>b</sup> is attributable to multivalent binding (avidity) and an associated slow dissociation rate constant, whereas BabA<sup>AD</sup>'s biphasic binding profiles reflect a mixed oligomer and monomer population, likely due to

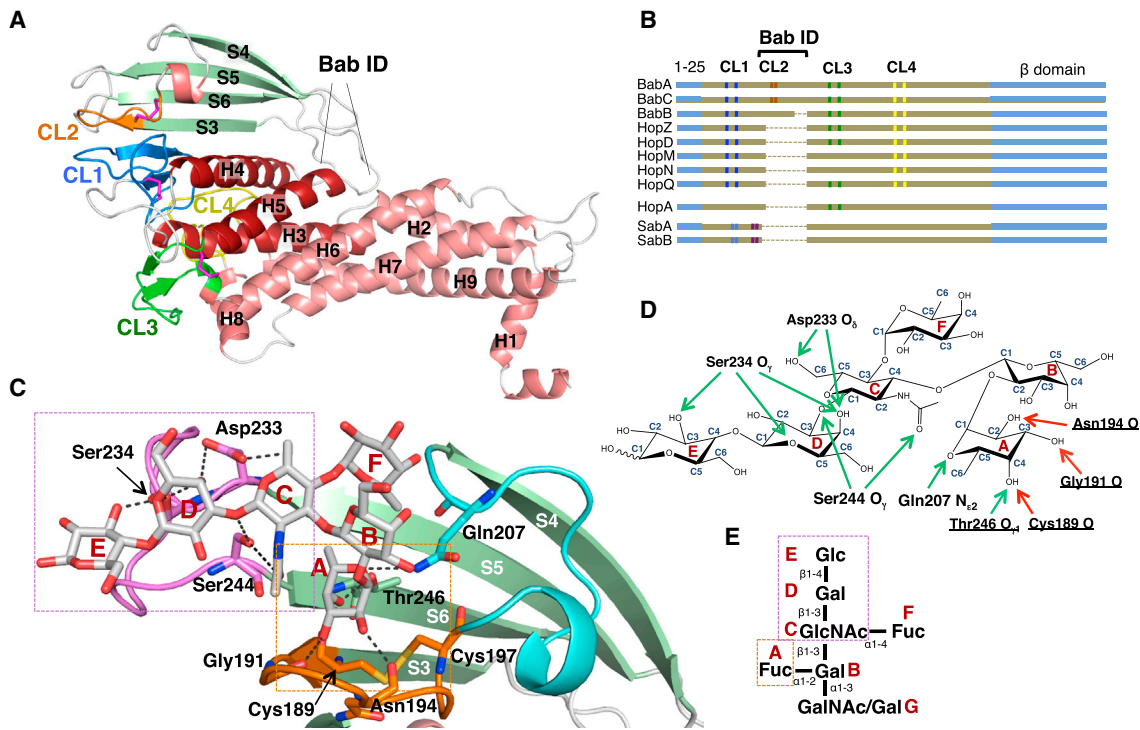

**Figure 2. Crystal Structure of BabA<sup>AD</sup>**

(A) X-ray structure of strain 17875 BabA<sup>AD</sup> (for clarity, Nb-ER19 is not shown, see Figure S1D). Helices and strands are colored red and green, respectively; Cys-bound loops CL1 (Cys106-Cys135), CL2 (Cys189-Cys197), CL3 (Cys277-Cys299), and CL4 (Cys395-Cys423) are colored blue, orange, green, and yellow, respectively. Bab ID: residues 175–255 (Figures S2 and S3).  
 (B) Schematic alignment of Cys-loop topology (vertical marks, colored as in Figures 1A and 1B) in the known or suspected Hop family adhesins. The  $\alpha$ -helical ectodomain and  $\beta$  strand domains are colored brown and blue, respectively (sequence lengths not to scale, see Figure S2 for full MSA).  
 (C) Structure of 17875 BabA<sup>AD</sup> (colored as in Figure 2) bound to Le<sup>b</sup> (Table S1). Le<sup>b</sup> and interacting amino acids (labeled) are shown in stick representation (O, N, and S atoms are colored red, blue, and yellow, respectively). Two binding subsites can be identified: the  $\alpha$ -1-2 fucose binding pocket (boxed orange) formed by CL2 and T246 in strand S6, and the type 1 chain binding region (boxed magenta) formed by the loop connecting strands S5 and S6 (i.e., DL2, see Figure 3).  
 (D) H-bond network steering the 17875 BabA<sup>AD</sup>-Le<sup>b</sup> interaction. Side-chain- and main-chain-mediated H-bonds are depicted as green and red arrows, respectively.  
 (E) Schematic of ABO Lewis b antigens (see Table S1), with monosaccharides labeled A–G.

destabilized oligomerization in the absence of the transmembrane domain.

### X-Ray Structure of the BabA Adhesin Domain

To gain molecular insight into BabA-mediated Le<sup>b</sup> binding, we determined the X-ray structure of BabA<sup>AD</sup>. Crystal growth was facilitated with one of two nanobodies (Nb-ER14 or Nb-ER19) generated against native BabA purified from *H. pylori* found to stabilize the recombinant BabA<sup>AD</sup> fragment (Figure S1B) (Subedi et al., 2014). Both Nbs specifically bound to BabA-expressing *H. pylori* cells, demonstrating that the conformation of Nb-stabilized BabA<sup>AD</sup> is equivalent to that of native BabA in the bacterial outer membrane (Figure S1C). The X-ray structures of the BabA<sup>AD</sup> in complex with Nb-ER14 or Nb-ER19 showed that BabA's ectodomain comprises a core domain consisting of seven  $\alpha$  helices organized in a joined 4-helix (H2, H6, H7, H9) plus 3-helix (H3, H4, H5) bundle (hereafter referred to as 4+3-helix bundle) (Figures 2A and S1D; Table S2). Multiple sequence alignment (MSA) of Hop proteins and superimposition of BabA<sup>AD</sup> on the SabA ectodomain structure (SabA binds sialyl-lactose and sialylated Lewis antigens as sLe<sup>x</sup> and sLe<sup>a</sup> found in inflamed

gatric tissues; Mahdavi et al., 2002; PDB: 4O5J; Pang et al., 2014; Figure S2) suggest that the 4+3-helix bundle topology is conserved among most Hop members. In SabA and a recently reported structure of the extracellular domain of strain J99 BabA (Hage et al., 2015), an additional  $\alpha$ -helical coiled-coil domain is seen at a right angle to the 4+3-helix bundle domain (Figure S2). Compared to SabA, the BabA<sup>AD</sup> comprises an 80 residue insertion domain (Bab ID; residues 175–255) that forms a four-stranded  $\beta$ -plate (S3–S6) located between H4 and H5 of the 4+3-helix bundle (Figures 2A and S2). Hop family members hold a striking, well-conserved paired cysteine pattern, composed of two to four equivalent Cys pairs in BabA, BabB, BabC, HopZ, HopD, HopQ, HopM, and HopN; one in HopA; whereas two Cys-pairs are located in other positions in SabA and SabB (Figures 2B and S2A). Our MS analysis of native full-length BabA (Table S3) and the BabA<sup>AD</sup> crystal structure show that the four cysteine pairs form sequential disulfide bonds, three of which (except Cys189/Cys197) form the bases of extended Cys-clasped loops (CL1, CL3, and CL4) protruding from a common surface of BabA's ectodomain covering a surface area of  $\sim 2,200 \text{ \AA}^2$  (Figures 2A and 2B). This area coincides with four of

five BabA regions with increased sequence diversity, suggesting a role in adaptive radiation (Figure 3A) (Aspholm-Hurtig et al., 2004). A fifth diversity region lies at the opposing end of the BabA ectodomain and corresponds to the loop connecting H6 and H7 (residues 327–348) (Figure 3A).

### Le<sup>b</sup> Binds a Structurally Heterogeneous Carbohydrate Binding Domain

BabA binds specifically to the lacto series glycans with a terminal fucose in  $\alpha$ 1-2 linkage (secretor Fuc) to the type 1 chain Gal $\beta$ 1-3GlcNAc core (Figure 2; Table S1) (Borén et al., 1993; Ilver et al., 1998). The Le<sup>b</sup> receptor is formed by addition of a second fucose, in  $\alpha$ 1-4 linkage to the type 1 chain GlcNAc residue (Figure 2E; Table S1). To gain structural insight into BabA's CBD, the 17875 BabA<sup>AD</sup> was crystallized together with the Le<sup>b</sup> hexasaccharide ("Le<sup>b</sup>6," residues A–F; Figure 2; Tables S1 and S2). Le<sup>b</sup>6 is located at the tip of the  $\beta$  sheet insertion domain (Bab ID; Figure S4A) with its reducing end glucose (E) pointing away from the CBD (Figure 2C). The secretor fucose is bound in a defined pocket formed between Thr246 in strand S6 and the disulfide-clasped loop CL2. Up to five hydrogen bonds (H-bonds) anchor the secretor fucose in the CL2-enclosed pocket. Its C2 and C3 hydroxyl groups form H-bonds with the backbone carbonyl groups of Asn194 and Gly191, respectively, and its C4 hydroxyl forms H-bonds with both the Cys189 carbonyl and the Thr246 hydroxyl (Figures 2C and 2D). An additional H-bond can form between the fucose's endocyclic oxygen (O5) and the Gln207 side chain amide. Le<sup>b</sup>'s subterminal  $\alpha$ 1-4 linked (Lewis) fucose does not make specific bonds with the adhesin (Figures 2C and 2D). Nevertheless, BabA shows about 2-fold stronger binding to Le<sup>b</sup> versus type 1 H neoglycoconjugates (Borén et al., 1993). In addition, BabA binds the GlcNAc-Gal-Glc moiety in the glycan core (C, D, and E, Figure 2E) via six H-bonds with the triad Asp233, Ser234, and Ser244 (Figures 2C and 2D). These "Asp-Ser-Ser-triad" interactions provide important specificity that distinguishes type 1 chain Le<sup>b</sup>-related glycans from type 2 chain glycans whose Gal-GlcNAc components are linked in  $\beta$ 1-4 rather than  $\beta$ 1-3 configuration (Table S1). Lack of BabA-type 2 chain glycan binding probably results from H-bond network disruption and steric interference with Asp233 and Ser234 (Figure S6E).

Two loops in the BabA binding pocket, DL1 and DL2, comprise regions with high sequence diversity due to positive selection (Figures 3A and S3) (Aspholm-Hurtig et al., 2004). Analysis of 237 BabA alleles shows strict conservation of the fucose-binding residues in the CL2 pocket (Cys189, Gly191, Asn194, and Thr246) (Figure 3B). In contrast, however, the type 1 chain binding site is located in DL2 and reveals considerable allelic variation, including conservative substitutions of an H-bond donor/acceptor in position 233 (D/Q/N), but with a predicted loss of hydrogen bonding capacity in ~35% and ~18% of cases at positions 234 (S/P/A) and 244 (S/A), respectively. The X-ray structures of the BabA CBD of Alaskan and Peruvian strains A730 and P436 (Figures 3C and S3), respectively, show the sequence variation in DL1 and DL2 results in a high structural heterogeneity in BabA's Le<sup>b</sup> binding pocket. In both BabA isoforms, structural reorganization of the DL1 loop and/or mutation in the 233-234-244 triad results in detachment and reorientation of the glycan's reducing end (Figure 3C), and is associated with an ~15- and

~20-fold loss in monovalent binding affinity for P436 and A730, respectively (Figures S4B and S4C). The presented BabA isoforms indicate the Gal $\alpha$ 1-2Fuc conformation in the CL2-enclosed pocket forms the invariant component in a structurally highly polymorphic BabA-Le<sup>b</sup> interaction (Figure 3C).

### CL2 Loop Conformation and High Affinity Lewis b Binding Are Redox Sensitive

To examine the functional importance of CL2 and other BabA Cys-Cys loops, we tested if Le<sup>b</sup> binding was affected by cystine reduction. First, RIA analyses with <sup>125</sup>I-labeled Le<sup>b</sup> and strain 17875 bacterial cells pre-exposed to dithiothreitol (DTT) showed loss of Le<sup>b</sup> binding, with a half maximum effective concentration (EC<sub>50</sub>) of 10 mM DTT (Figure 4A). The EC<sub>50</sub> increased to >40 mM when DTT and Le<sup>b</sup> were coincubated with the bacterial cells, which suggests that Le<sup>b</sup> binding shields the CL2 disulfide from the reducing agent. This agrees with the structural data showing that Le<sup>b</sup> blocks solvent accessibility of Cys189-Cys197 (Figure 2C). The redox-induced loss of Le<sup>b</sup> binding was fully reversible after reconditioning of inactivated (to exclude de novo synthesis) bacterial cells in nonreducing buffer (Figure 4A), which indicates that disulfide reduction does not irreversibly damage the structural prerequisites for Le<sup>b</sup> binding. In addition, far UV circular dichroism showed that the 17875 BabA<sup>AD</sup> retains its secondary structure content upon disulfide reduction (Figure S4D). Double Cys189Ala/Cys197Ala mutants ("BabACL2") were made to test if loss of the CL2 disulfide alone might underlie the redox sensitivity of BabA-Le<sup>b</sup> binding. RIA tests showed that a chromosomal *babACL2* mutant of *H. pylori* strain J166 had lost all Le<sup>b</sup>-binding activity (Figure 4B), even though the BabACL2 protein was expressed in similar levels to that of its WT parent and reached the cell surface as a folded protein (Figures 4 and S4E–S4G). However, residual Le<sup>b</sup> binding was seen when BabACL2 from strain 17875 was expressed from a plasmid in the *babA* knockout strain P1 $\Delta$ *babA*, showing that some BabA proteins can retain a low level of Le<sup>b</sup> binding in absence of the CL2 disulfide. Also, when tested for the DTT-susceptibility of Le<sup>b</sup>-binding, *H. pylori* clinical isolates were found to fall into two phenotypic groups, with EC<sub>50</sub> values between 2 and 10 mM (Figure 4C). To characterize the residual Le<sup>b</sup> binding by CL2 mutant bacteria, cells expressing WT and CL2 mutant 17875 BabA were flowed over a SPR chip surface containing immobilized Le<sup>b</sup>. The kinetic profiles of the BabACL2 mutant showed a lowered association rate compared to WT (Figure 4D), whereas its slow dissociation rate was intact. This outcome indicates the Cys189Cys197 disulfide bond serves to constrain the CL2 loop into a high-affinity encounter conformation for binding of the Le<sup>b</sup> secretor fucose (Figures 3B and S6A).

### The Redox-Active Pharmaceutical N-Acetylcysteine Attenuates Le<sup>b</sup> Binding and BabA-Mediated *H. pylori* Mucosal Adherence and Inflammation

Based on the critical role of CL2 in Le<sup>b</sup> binding, we tested if redox-active pharmaceuticals could impair BabA mediated *H. pylori* mucosal adherence. We focused on N-acetylcysteine (N-acetyl-L-cysteine; NAC), a reducing agent proven to treat chronic obstructive pulmonary disease (COPD) and cystic fibrosis, and that in combination therapies with antibiotics has shown improved *H. pylori* clinical eradication rates, possibly

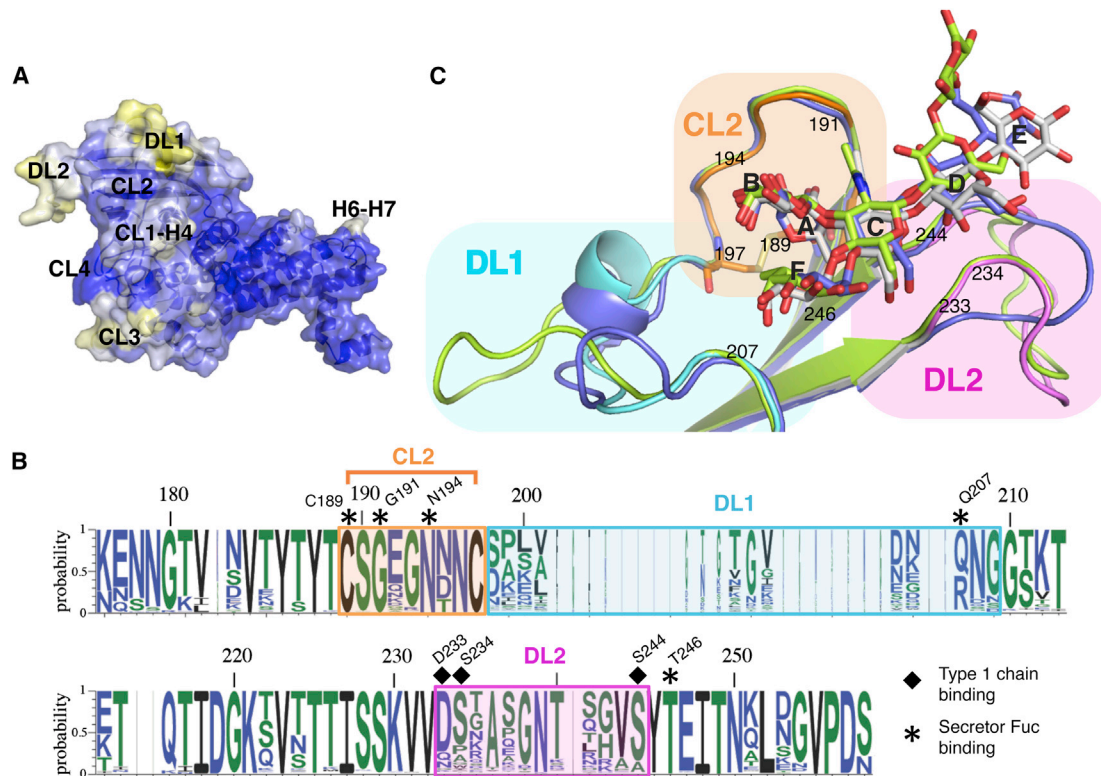

**Figure 3. Structure of BabA<sup>AD</sup> Bound to Lewis b by H Hexasaccharide**

(A) Solvent-accessible surface of BabA<sup>AD</sup>, with blue, white, and yellow corresponding to high, medium, and low sequence conservation in multiple sequence alignment of 237 publicly available BabA sequences. Four out of five regions of increased sequence diversity map to the same side of the adhesin: (i) the loop connecting CL1 and H4 (CL1-H4; residues 136–146); (ii and iii) two loops in the Bab ID, e.g., DL1 (Diversification Loop 1; residues 200–210, connecting CL2 and S4) and DL2 (residues 234–242, connecting S5 and S6) (Figures 2D and S3); and (iv) CL3 (residues 279–299).

(B) Superimposition of strain 17875 BabA<sup>AD</sup> (colored as Figure 2C), with mutant BabA<sup>AD</sup> where the strain 17875 insertion domain is replaced by that of strain P437 (blue) or A730 (green).

(C) Sequence conservation plot of the BabA insertion domain. Residues that interact with the secretor fucose and core 1 moiety are highlighted by asterisks and squares, respectively. See also Figure S3 and Table S2.

due to NAC's mucolytic activity (by means of mucin disulfide reduction) (Cammarota et al., 2010; Makipour and Friedenberg, 2011). We tested if NAC treatment of *H. pylori* would interfere with Le<sup>b</sup> binding. First, fluorescently labeled *H. pylori* was exposed to NAC and applied to Le<sup>b</sup> expressing human gastric mucosa in vitro. Bacterial adherence was inhibited by 86% at 10 mg/mL NAC and almost eliminated by 20 mg/mL (Figure 5A). Next, NAC treatment was applied to test efficacy in detachment of adherent *H. pylori*, where 20 mg/mL NAC detached 50% of cells bound to gastric mucosa, and 10-fold more NAC was needed to remove remaining bacterial cells (Figure 5A). Pretreatment of gastric sections with up to 200 mg/mL NAC did not affect bacterial binding (Figure S5A), while RIA experiments showed that incubation of bacteria with 20 mg/mL NAC inactivated BabA-Le<sup>b</sup> binding (Figure 5B), arguing that NAC does not alter receptor availability but inhibits adhesive function of the bacteria. Quantitative MS analysis of tryptic digests of NAC-treated BabA<sup>AD</sup> protein showed an NAC dose-dependent reduction of the CL2 disulfide bond, with an EC<sub>50</sub> of 9 mg/mL (Figures S5B and S5C). Accordingly, we attribute NAC's inhibition of BabA-dependent adherence to human gastric mucosa to disruption of BabA's critical CL2 disulfide bond. The increased NAC con-

centrations needed for bacterial detachment may reflect the competitive binding by Le<sup>b</sup> and its shielding protection of CL2 from NAC-mediated reduction (Figures 2C, 4A, 5A, and 5B).

We next tested for an effect of NAC during *H. pylori* infection of Le<sup>b</sup>-expressing transgenic mice (Falk et al., 1995). A 2 week treatment with 40 mg/day/animal of NAC in the drinking water caused a 2-fold reduction in *H. pylori* epithelial adherence (Figures 5C and S5D) and 13-fold lower neutrophil recruitment to the gastric mucosa of NAC-treated mice (Figures 5D and S5E). These results indicate that interference with BabA-mediated adherence reduces infection-induced mucosal inflammation, probably by diminishing the ability of adherence to facilitate delivery of proinflammatory effectors such as CagA, VacA, peptidoglycan, urease, etc. (Ishijima et al., 2011; Posselt et al., 2013). Previous work has indeed shown that Le<sup>b</sup>-dependent adherence promotes gastritis and suggested that it increases *H. pylori* virulence, rather than acting solely to promote colonization (Guruge et al., 1998). However, as disulfide bonds in proteins are widespread, we cannot exclude models in which NAC's observed in vivo inflammation dampening involves additional mechanisms that synergize with CL2 reduction to diminish virulence.

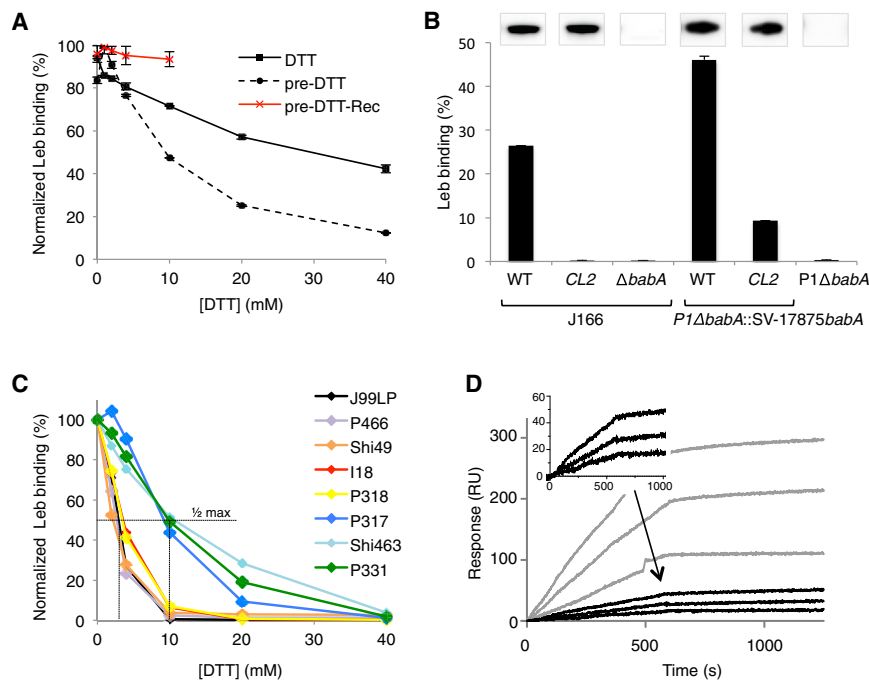

**Figure 4. The CL2 Disulfide Bond Is Crucial for High-Affinity Le<sup>b</sup> Binding**

(A) Normalized radioimmunoassay (RIA) of *H. pylori* strain 17875/Le<sup>b</sup> binding to <sup>125</sup>I-labeled Le<sup>b</sup> in presence of increasing concentrations of DTT, added prior to (dotted lines) or coincubated with (solid lines) Le<sup>b</sup>. DTT-exposed bacteria resuspended in DTT-free buffer for 2 hr, show recovery of Le<sup>b</sup> binding (red line). Data points show mean ± SD, n = 2.

(B) RIA Le<sup>b</sup>-binding of (left) the J166CL2 mutant (Cys189Ala and Cys197Ala), J166 WT, and J166ΔbabA; and (right) a babA deletion mutant of strain P1 (P1ΔbabA) and this strain conjugated with a shuttle vector expressing WT or CL2 mutant babA from strain 17875. Inlays show α-BabA immunoblots of the corresponding strains. Data points show mean ± SD, n = 2.

(C) RIA experiment showing relative Le<sup>b</sup> binding of *H. pylori* clinical isolates preincubated with DTT.

(D) SPR sensorgrams of the *H. pylori* strains with plasmid-based 17875 babA expression CL2 or WT BabA (black or gray response curves, respectively). Three dilutions of bacteria were flushed over immobilized Le<sup>b</sup> receptor conjugates, amplification of the CL2 curves are shown in inset. See also Figure S4.

### BabA Binding of bg A and B Antigens

The majority of *H. pylori* strains are *generalists*, which bind to Le<sup>b</sup> and also ALe<sup>b</sup> and BLe<sup>b</sup> gastric mucosal glycans, in contrast to *specialists* that bind bgO/Le<sup>b</sup> only (Aspholm-Hurtig et al., 2004). Cocrytals of 17875 BabA<sup>AD</sup> with ALe<sup>b</sup>5 or BLe<sup>b</sup>7 (Table S1) show their binding conformation closely resembles that seen for Le<sup>b</sup>6, particularly at the secretor fucose. The bg A GalNAc or bg B Gal residues are positioned in a shallow pocket above Gln207 and Cys197-Ser198 (Figures 6 and S6D), with additional hydrogen bonds between Gln207 and the GalNAc C2 N-acetylgroup or the Gal C2 hydroxyl. In the BLe<sup>b</sup> complex, the Glu192 carboxyl also binds the Gal C6 hydroxyl. ITC indicates a 2-fold increase in monovalent affinity for the 17875 BabA<sup>AD</sup>:BLe<sup>b</sup>7 interaction compared to 17875 BabA<sup>AD</sup>:Le<sup>b</sup>5 (Figure S6B). Cocrytallization of 17875 BabA<sup>AD</sup> with the A type 1 hexasaccharide (A6-1; Figure S6D; Table S1) showed that the GlcNAc-Gal-Glc core of the type 1 glycan forms an alternative H-bond network with the Asp233-Ser234-Ser244 triad, possibly caused by a slight reorientation of the ligand core in glycans lacking the α1-4-linked Lewis fucose (Figure S6D). ITC showed that absence of the Lewis fucose in the 17875 BabA<sup>AD</sup>:A6-1 complex results in an ~3.5 and 2-fold lower monovalent affinity compared to complexes with BLe<sup>b</sup>7 and Le<sup>b</sup>5, respectively (Figure S6C). Overall, the crystal structures of BabA<sup>AD</sup> with Le<sup>b</sup>6, BLe<sup>b</sup>7, ALe<sup>b</sup>5, and A6-1 reiterate that CL2-mediated binding of the secretor fucose constitutes the strongest conformational constraint in the BabA-glycan receptor interactions, in accord with its dominant role in BabA-receptor binding in vivo.

### DL1 Polymorphism Affects Receptor Preference

We previously showed that *H. pylori* isolates exhibit high polymorphism in Le<sup>b</sup> binding strength and ABO preference, apparently reflecting adaptive selection (Aspholm-Hurtig et al.,

2004). Although most adherent strains produce generalist BabA proteins, able to bind ALe<sup>b</sup>, BLe<sup>b</sup>, and Le<sup>b</sup> glycans, others (the majority South American Amerindian) are Le<sup>b</sup>-only specialists. The 17875 BabA<sup>AD</sup> crystal structures revealed that DL1, the 9–22 residue long diversity loop immediately downstream of the CL2, shapes a binding pocket for the extra GalNAc and Gal derivatives of bg A and B glycans (Figure 6), making it a prime candidate region for modulation of receptor preference. To test this hypothesis, the DL1 loop of generalist strain 17875 (residues aa 198–208) was replaced with that of specialist strain S831, which does not bind A- or BLe<sup>b</sup> (Figures 7A and S3) (Aspholm-Hurtig et al., 2004). This recombinant “BabA<sup>AD</sup>:DL1-S831” adopts the Le<sup>b</sup>-specialist binding characteristics of its S831 donor parent: (1) although the S831 DL1 graft is active for Le<sup>b</sup> binding (Figures 7B and S7A), titration with BLe<sup>b</sup>7 showed no binding heat signal in ITC (Figure S7B); and (2) competition with soluble Le<sup>b</sup>5, but not ALe<sup>b</sup>5, suppressed BabA<sup>AD</sup>:DL1-S831 binding to a Le<sup>b</sup>-coated SPR chip in a concentration dependent manner (Figures 7B and 7C). To visualize the molecular basis for receptor preferences, the recombinant specialist protein BabA<sup>AD</sup>:DL1-S831 was crystallized in complex with Le<sup>b</sup>6 and its structure compared to that of its generalist parent BabA<sup>AD</sup> in complex with Le<sup>b</sup>6 or BLe<sup>b</sup>7 (Figure 7A). The DL1 loops in 17875 and S831 adopt a highly similar backbone conformation, reflected in an almost identical binding conformation and H-bond pattern for Le<sup>b</sup> in the 17875 parent BabA and S831 DL1-grafted BabA (Figure 7A). The most noticeable differences in the recombinant S831 specialist and generalist 17875 parent result from the Leu-Pro (S831) versus Ser-Lys (17875) residues immediately downstream of CL2. Residues Lys199 to Thr202 in 17875 form an α-helical turn (Figures 3B and 3C) capped by an H-bond of Ser198 with the Ala201 backbone amide (Figure 7A). Leu-Pro in the S831 specialist causes loss of the capping hydrogen

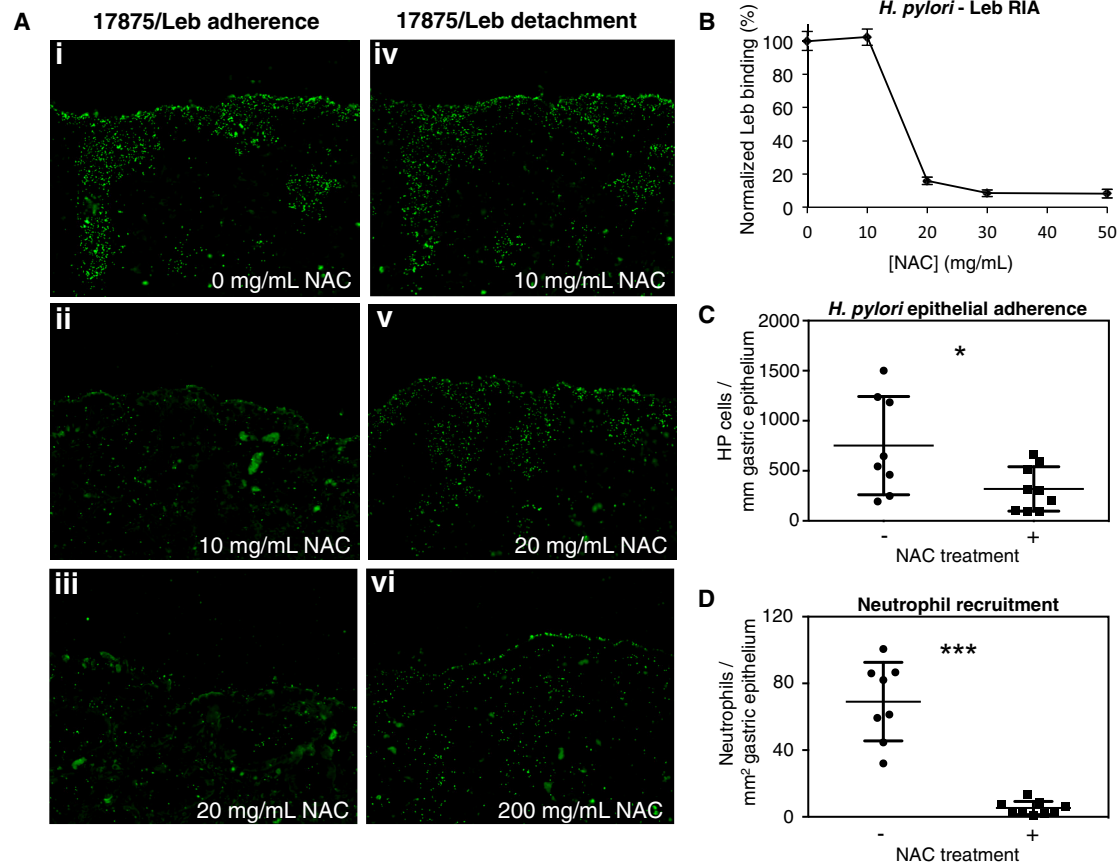

### Figure 5. Treatment of *H. pylori* cells with N-Acetylcysteine Blocks BabA Adherence

(A) FITC-labeled 17875/Leb bacteria binding to human gastric tissue sections. Prior to binding, bacteria were preincubated with 0, 10, or 20 mg/mL NAC (i, ii, and iii, respectively), resulting in 100%, 14%, and less than 5% adherent bacteria, respectively. In panels iv, v, and vi, tissue sections with bound bacteria are treated with 10, 20, or 200 mg/mL NAC, resulting in undetectable, 50%, and over 90% bacterial detachment, respectively.

(B) Normalized RIA Le<sup>b</sup>-binding of *H. pylori* strain 17875/Leb when being subjected to increasing concentrations of N-acetylcysteine (0, 10, 20, 30, and 50 mg/mL) for 1 hr at 37°C. Data points show mean ± SD, n = 3.

(C and D) *H. pylori* epithelial adherence and neutrophil recruitment in gastric epithelium of mice treated for 2 weeks with 0 (–) or 40 (+) mg/day NAC in their drinking water. Data points show, per animal, mean bacterial counts (n = 3) per mm of immunostained gastric epithelium (C; Figure S5D), or mean neutrophil counts (n = 3) per mm<sup>2</sup> of immunohistostained gastric sections (D; Figure S5E). Statistical comparison of the groups produced a Welch-corrected t(9) = 2.29, \*p = 0.0475; and t(7) = 7.559, \*\*\*p = 0.0001, respectively. Horizontal lines show sample mean ± SD, n = 8 (–NAC) and 9 (+NAC). See also Figure S5.

bond and rotation of residue 198 into the binding pocket that accommodates bg A and B GalNAc and Gal in generalist BabA (Figure 7A). Thus, inward rotation of a bulky 198 residue (Leu198 in S831) will interfere with the protruding bg A or B Gal derivatives. Analysis of 67 BabA proteins with known bg preference profiles (Aspholm-Hurtig et al., 2004) identified that Asp, Asn, or Leu at position 198 combined with Pro at 199 (11 Asp-Pro, 4 Asn-Pro, and 1 Leu-Pro) as a conserved property in 16 out of 18 specialist strains. In most Latin American strains, specialist adaptation is also accompanied by a 7–11 residue insertion in DL1, as well as a replacement of Gln207 with Arg (Figure S3). The BabA ID phylogeny reveals the characteristic specialist bulky residue 198-Pro199 pairs in several polyphyletic branches, e.g., in S831, P454, or P447 (Figure S3), which suggests mechanisms for functional selection and convergence to specialist phenotypes. In comparison, generalist strains show a higher diversity in positions 198 and 199, with 18 Ser-Pro, 9 Ser-Lys, 4 Ser-Glu, and 4 Ser-Ile pairs in the 35 cases examined.

Four strains with specialist genotype in the 198–199 positions show an unexpected generalist phenotype (P436, P439, P442, and P452; Figure S3). The X-ray structure of BabA<sup>AD;ID-P436</sup> in complex with BLe<sup>b</sup>7 shows the loss of interaction with the type 1 chain core (also seen in the BabA<sup>AD;ID-P436</sup>–Le<sup>b</sup>6 complex; Figure 3B) results in the ligand pivoting around the secretor fucose such that the bg B Gal is projected above rather than in clash with the D198 residue (Figure S7F). Strikingly, all four defiant specialists show loss of function mutations in the D-S-S triad in DL2 (Figure S3), suggesting the noncanonical generalist binding by a compensatory rotation of the ABO Le<sup>b</sup> ligands is a common mechanism in these strains.

Another adaptation in the bg preference site is seen in strain A730, where the  $\alpha$ -helical turn in DL1 that shapes the bg A or B GalNAc or Gal binding pocket is stretched out into a hairpin loop (Figures 3B and S3). This results in up to five H-bond contacts with the bg derivative and increases affinity from 1.8 mM for Le<sup>b</sup>6 to 93 or 305  $\mu$ M Kd for BLe<sup>b</sup>7 or A6-1, respectively.



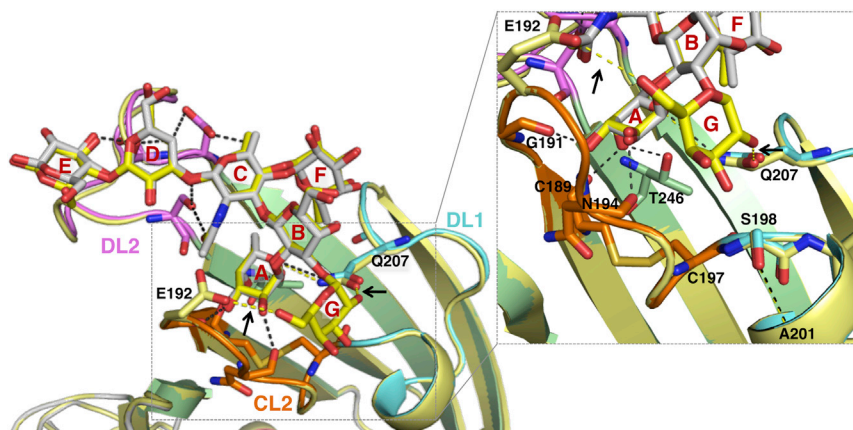

**Figure 6. BabA Binding to bg A and B Glycans**

Overlay of the structures of BabA<sup>AD</sup> bound to Le<sup>b</sup><sub>6</sub> (colored as Figure 3B) or BL<sup>e</sup><sub>7</sub> (Table S1; yellow). Le<sup>b</sup><sub>6</sub> and BL<sup>e</sup><sub>7</sub> are shown in stick representation, as are glycan-binding amino acids (shown for BabA<sup>AD</sup>:Le<sup>b</sup><sub>6</sub> complex, and Glu192 and Gln207 for the BL<sup>e</sup><sub>7</sub> complex). Hydrogen bonds present in both the Le<sup>b</sup><sub>6</sub> and BL<sup>e</sup><sub>7</sub> interaction or specific to BabA<sup>AD</sup>:BL<sup>e</sup><sub>7</sub> (see arrows) are shown in black or yellow dashed lines, respectively. Inset shows detail (rotated up by ~45°) of the subpocket binding the bg B Gal. Complexes with AL<sup>e</sup><sub>5</sub> or A6-1 are shown in Figure S6D.

Thus, in A730, poor binding of the type 1 chain at the DL2 site can be compensated by improved binding of bg determinants at the DL1 site, effectively making the strain an A/B specialist (Figures S7C–S7E and S3).

Given the apparent plasticity in bg preference site, we tested the possibility of changing generalist versus specialist preference profiles simply by spontaneous mutation. Glycan affinity-IF-microscopy of a specialist strain S831 population with Alexa 555-AL<sup>e</sup><sub>5</sub> was used to identify the occurrence of generalist derivatives (Figure 7E). Colony screening identified several positive clones, designated S831G, able to bind both AL<sup>e</sup><sub>5</sub> and Le<sup>b</sup> (Figure 7D). Like many strains, S831 contains *babA* genes at two different chromosomal loci. Each generalist derivative clone (S831G) contained one base substitution mutation in codon 198 (TCG to TTG), resulting in a Leu198 Ser (generalist) substitution, and the original TCG (Leu198) specialist codon at the other *babA* locus (Figure 7D). As comparison, two tested clones with original specialist phenotypes were unchanged in sequence at each *babA* locus (codon 198 TCG, Leu) (Figure 7D). A competition RIA showed cumulative binding of AL<sup>e</sup><sub>5</sub> and Le<sup>b</sup> in the generalist-derivative phenotype, which corresponds to simultaneous expression of specialist and generalist BabA proteins (Figure 7F). Thus, *H. pylori* strains with adhesin gene duplications can coexpress both BabA generalist and specialist proteins from their duplicate and divergent *babA* genes.

## DISCUSSION

Our data show the glycan binding site of the virulence-associated adhesin BabA is structurally geared toward adaptation, here exemplified in the recognized *generalist* versus *specialist* ABO binding preferences. BabA's CBD colocalizes with two sequence regions (DL1 and DL2) that are high in positive selection of diversifying amino acid substitutions (Aspholm-Hurtig et al., 2004). Most structurally characterized blood antigen binding adhesins bind to small, di-, tri-, or tetrasaccharide epitopes at the terminal, nonreducing end of the glycan (Boraston et al., 2006; Choi et al., 2008; Gregg et al., 2008; Holmner et al., 2007). Instead, BabA employs a three-pronged binding site to bind the extended ABO/Le<sup>b</sup> glycans: (1) the main chain of the disulfide clasped loop CL2 wraps around the  $\alpha$ 1-2-linked secretor

glucose and forms the structurally conserved anchor point in the BabA-Le<sup>b</sup> interaction; (2) the DL2 Asp-Ser-Ser triad binds the reducing end  $\beta$ 1,3GlcNAc-Gal-Glc moiety of the glycan, which is determinant of ABO type-1 chains; and (3) the DL1 region interacts with the bg A and B GalNAc or Gal substituents and determines the adhesin's bg preference (Figures 3 and S7F). The DL2 region provides BabA with a specificity mechanism that selects type-1 chain ABO/Le<sup>b</sup> antigens and discriminates against type-2 chains antigens such as ABO-2/Le<sup>y</sup> antigens (Figure S6E). Together, the CL2 clasp, DL1, and the DL2 Asp-Ser-Ser triad cooperate to create the affinity/specificity balance that directs BabA binding toward ABO/Le<sup>b</sup> type-1 chain antigens and gives rise to the wide range of individual binding affinities among BabA clinical isolates (Aspholm-Hurtig et al., 2004). Type 1 chain selection reflects *H. pylori*'s cell lineage tropism for the foveolar epithelium, which is glycosylated with both fucosylated type-1 and 2 chains, in contrast to the glandular (deeper located) region that mostly holds type-2 series ABO glycans (Mollicone et al., 1985). In this way, *H. pylori* can enter and invade the gastric mucosa without risk of detrimental entanglement with type-2 chain decorated cells and innate immunity decoys such as antimicrobial mucins (Kawakubo et al., 2004).

By exchanging DL1 sequences, we could exchange allele-specific binding properties such as receptor binding preference (Figures 7 and S7). In the canonical DL1 conformation seen in 17875 and S831 BabA, Pro199 in combination with a bulky amino acid in position 198 (such as Asn, Asp, or Leu) shifts generalist ABO binding to specialist bg O binding by steric interference with the bg A or B Gal derivatives. In Europe, with very few specialist strains, the Spanish S831 strain is exceptional by its remarkably strong preference for bg O antigens (Le<sup>b</sup>) (Aspholm-Hurtig et al., 2004). Nevertheless, we found that also this distinct phenotype can fluently shift into the generalist ABO binding preference, by merely a single nucleotide mutation and amino acid substitution in the determining aa198 position (Figures 7 and S7). Thus, *H. pylori* has the inherent ability for rapid dynamic adaptation to the host bg phenotype, yet panels of clinical isolates have shown no such individualized adaptation, even over a full lifetime of infection, but instead appear to reflect a population-level adaptation to the ABO prevalence (Aspholm-Hurtig et al., 2004). We speculate that the geographic specialist/generalist diversification stems from a transmission bottleneck,

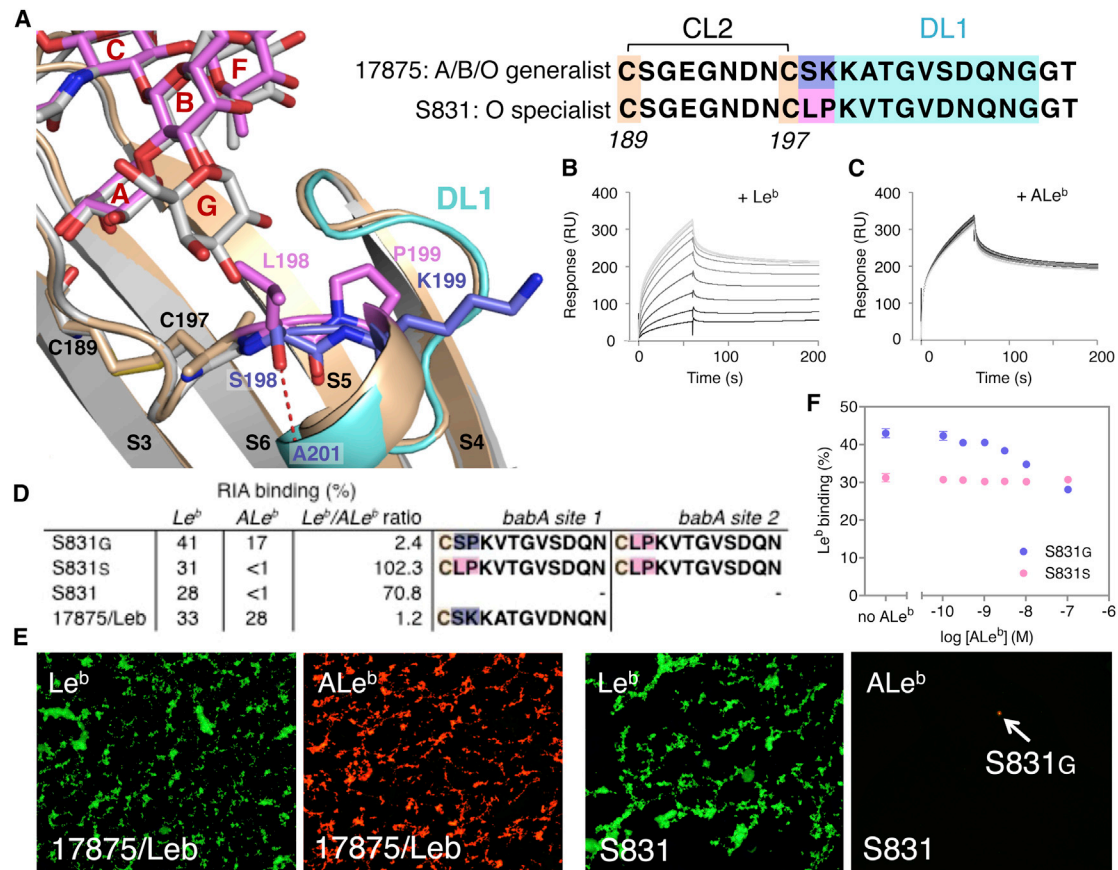

### Figure 7. Molecular Determinants of BabA bg Preference

(A) Structure of the BabA S831 DL1 grafted hybrid (BabA<sup>AD,DL1-S831</sup>; tan, positions 198–199 in magenta) in complex with Le<sup>b</sup>6 (magenta), and wild-type 17875 BabA<sup>AD</sup> bound to BL<sup>b</sup>7 (light gray, with DL1 region in cyan and positions 198–199 in blue). In the specialist hybrid the replacement of Lys199 with Pro199 results in the inward rotation of residue 198. Replacement of Ser198 of 17875 by Leu198 causes a steric occlusion of the Gal or GalNAc determinants in BL<sup>b</sup> or ALe<sup>b</sup>. (B and C) SPR sensorgrams of binding of BabA<sup>AD,DL1-S831</sup> to a Le<sup>b</sup>-coated chip in the presence of competing soluble glycans: Le<sup>b</sup>5 (B) or ALe<sup>b</sup>5 (C), added in a 2-fold dilution series from 5 mM to 1 μM, colored gray to black. (D) RIA of Le<sup>b</sup> versus ALe<sup>b</sup> binding of a generalist (S831G[D]) and specialist clone (S831S), and the control strains S831 and 17875/Leb. Amino acid sequence of the DL1 region (shown starting at Cys197) of the babA allele in the two loci of the corresponding strains. Binding and sequencing data are representative for two independent S831G[D] and S831S clones isolated. (E) *H. pylori* 17875/Leb demonstrates the generalist phenotype and ability to bind both Alexa 488-labeled Le<sup>b</sup> (i) and Alexa 555-labeled ALe<sup>b</sup> (ii). Probing of the original sweep population of the specialist *H. pylori* strain S831 by Alexa 555-labeled ALe<sup>b</sup> conjugate demonstrated by fluorescence microscopy the rare presence of S831 bacterial cells of the generalist phenotype. (F) Competition RIA where Le<sup>b</sup> binding to a S831G[D] (blue) and S831S (magenta) clone is performed in competition with nonradiolabeled ALe<sup>b</sup>. Increasing concentrations of ALe<sup>b</sup> titrate out 34.6% of the Le<sup>b</sup> binding signal, demonstrating the concomitant expression of a generalist and a specialist babA variant. Data points show mean ± SD, n = 3. See also Figure S7.

where in ABO-mixed populations, generalists can always adhere to a new individual regardless of bg phenotype. For most European generalists, a switch to specialist preference would require amino acid substitution in both the 198 (i.e., Ser to Asn, Asp, or Leu) and 199 (Glu or Lys to Pro) position (Figure S3), possibly explaining the lack of specialist adaptation within bgO individuals in this mixed ABO population. Notable exceptions are strains S855, S858, and S865, where the Ser-Pro 198-199 sequence is just one step away from a bg preference switch. In populations with no transmission bottleneck for bg O specialists, a consequence of convergence to specialist high-affinity binding may be efficient early life transmission as fetal gastric glycosylation slowly matures into fucose containing glycan landscapes

(Bry et al., 1996). Thus, high-affinity specialist strains may be better suited to establish infection at early infancy, and generalist strains may be lost from the population through attrition. bg O individuals have long been recognized to be at an increased risk for developing peptic and duodenal ulcer disease (Aird et al., 1954). Future analysis will need to show to what extent a stronger, specialist-type *H. pylori* binding to bg O/Le<sup>b</sup> antigens and associated vigorous inflammation responses may be at the basis of these epidemiological observations, a scenario that could also contribute to the gastric cancer pandemic among South American Amerindians.

Structural stability in the BabA binding site has its basis in the CL2 disulfide that clasps a conserved nine-residue loop into a

conformation poised to bind the glycan's  $\alpha$ 1-2 fucose residue. Loss of the CL2 clasp results in drastically lowered association (On-rate) in Le<sup>b</sup>-binding, whereas at least for strain 17875 BabA, dissociation (Off-rate) remains intact (Figure 4D), suggesting that the disulfide clasp acts to optimize conformational fit during receptor encounter. We show that chemical disruption of the CL2 disulfide reversibly attenuates Le<sup>b</sup> binding and interferes with *H. pylori* adherence to the gastric mucosa. Possibly, rapid changes in redox conditions of the gastric microenvironment, such as induced hypoxia and host or *H. pylori*-secreted oxido reductases (Hogg, 2003; Windle et al., 2000), could act as an adherence kill switch in response to rapid exacerbations in local inflammation activity. Of particular relevance, the sensitivities of BabA binding to reducing conditions are not uniform, but rather show that clinical isolates cluster into different susceptibility groups (Figure 4C), and suggests that the CL2 disulfide redox sensitivity is context dependent and possibly adaptive. Thus, *H. pylori* might modulate binding properties by amino acid substitutions both within the  $\alpha$ 1-2 fucose-binding site and in addition by contextual substitutions in the proximal domains.

Finally, the unique BabA redox sensitivity provides a target of translational potential. We demonstrate that treatment with N-acetylcysteine (NAC), a redox-active pharmaceutical, disrupts the CL2 disulfide, inactivates BabA's binding properties, and hence blocks BabA-mediated adherence of *H. pylori* to human gastric mucosa. In Le<sup>b</sup>-expressing mice infected with *H. pylori*, a 2 week oral NAC treatment resulted in close to 15-fold reduction in neutrophil recruitment (Figures 5 and S5). *H. pylori* eradication treatments with NAC supplementation have previously shown synergistic therapeutic potential, attributed to the mucolytic effects of NAC (Makipour and Friedenber, 2011). However, in light of the BabA redox sensitivity, it is now tempting to propose that NAC augments efficacy of the eradication regime by inhibition and displacement of *H. pylori* mucosal adherence and hence destabilization of its replicative biofilm niche (Tan et al., 2011).

The redox-sensitive CL2 and two diversification hotspots in the BabA glycan-binding site emphasize BabA's extraordinary adaptive potential. The structural framework here provided will be important in establishing the relation between BabA polymorphisms and disease outcome as well as in devising immuno- or chemotherapeutic countermeasures.

## EXPERIMENTAL PROCEDURES

### Bacterial Strains

17875/Leb is a spontaneous mutant from *H. pylori* CCUG17875 that binds Le<sup>b</sup> but not sialylated glycans (Mahdavi et al., 2002). Strain 17875babA1A2 has deletions of the two babA genes, replaced with kanamycin (A1) and chloramphenicol (A2) resistance markers (Ilver et al., 1998). The generalist strain J166, frequently used for Rhesus macaque challenges (Solnick et al., 2001), was used to make the Cys189Ala and Cys197Ala double mutation in CL2 (see Supplemental Experimental Procedures). The J166 $\Delta$ babA was used as a control. For SPR studies probing Le<sup>b</sup> binding of the CL2 mutant, *H. pylori* P1 $\Delta$ babA was used with 17875babA or its isogenic CL2 mutant (Cys189Ala/Cys197Ala) expressed from the pIB6 shuttle vector. Strain S831 is a specialist strain, and S831G(D) is a spontaneous generalist S831 derivative identified in this study. S831S cl-1 and S831G(D) cl-1 are clones obtained with colony membrane screening (described in the Supplemental Experimental Procedures).

### Protein Production and Purification

Native BabA protein was purified from *H. pylori* CCUG 17875/Leb according to Bugaytsova et al. (personal communication). recBabA; 17875 BabA<sup>AD</sup>; its S831 DL1 loop mutant; and the P436, A730 isoforms are produced recombinantly in *E. coli* as outer membrane or periplasmically targeted proteins and purified by His-tag affinity purification. Cloning, production, and purification methodology is described in the Supplemental Experimental Procedures.

### Structure Determination

The X-ray structure of the BabA<sup>AD</sup> fragment in complex with Nb-ER14 was determined by single anomalous dispersion using crystals with selenomethionine labeled BabA<sup>AD</sup>. All BabA<sup>AD</sup> structures in complex with Nb-ER19 were determined by molecular substitution with the 17875 BabA<sup>AD</sup>. Nb-ER14 structure. Ligand complexes were formed by cocrystallization with 1 mM of the various sugar ligands (Table S1). See Table S2 for data collection and refinement statistics and Supplemental Experimental Procedures for full details.

### Binding Assays

Le<sup>b</sup> binding to various *H. pylori* strains was assessed by radioimmunoassay using <sup>125</sup>I-labeled Le<sup>b</sup>-HSA glycoconjugate produced as described (Aspholm et al., 2006). In vitro binding properties of the BabA protein and the different BabA fragments and mutants were obtained by SPR and ITC. Expanded description is in the Supplemental Experimental Procedures.

### In Vitro Inhibition and Detachment of *H. pylori* Adherence to Human Gastric Mucosa Tissue by NAC

Suspensions of FITC labeled *H. pylori* strain 17875/Leb were mixed with a series of N-acetylcysteine dilutions prepared in SIA blocking buffer (0, 10, 20, and 100 mg/mL). Bacteria were NAC-incubated at 37°C for 1 hr and then applied to human gastric mucosa histo tissue sections for 2 hr. Unspecific binding was removed by PBS-Tween, and slides were subjected to microscopy for digital quantification. In the "detachment" regime, adherent bacteria (in absence of NAC), applied and washed as above, were incubated for 1 hr at 37°C with a series of NAC dilutions in SIA blocking buffer (10, 20, 100, and 200 mg/mL). Slides were again washed in PBS-Tween and analyzed as described above. To assess the effect of NAC treatment on receptor availability in the human gastric mucosa sections, sections were preincubated with N-acetylcysteine dilutions prepared in SIA blocking buffer (0, 10, 20, 100, and 200 mg/mL NAC) for 2 hr at room temperature and then washed three times in PBS-Tween. Suspensions of FITC-labeled *H. pylori* strain 17875/Leb were applied and washed as above, and slides were subjected to microscopy.

## SUPPLEMENTAL INFORMATION

Supplemental Information includes Supplemental Experimental Procedures, seven figures, and three tables and can be found with this article online at <http://dx.doi.org/10.1016/j.chom.2015.12.004>.

## AUTHOR CONTRIBUTIONS

K.M. and S.S. produced the recombinant BabA ectodomains, solved their X-ray structures, and performed binding assays. E.R., S.M., and L.H. generated BabA-specific Nbs. P.G. performed mutagenesis, characterization, and binding studies on CL2 mutants and *H. pylori* strains. P.G., M.F., and L.R. performed NAC experiments. G.C. performed binding studies on recombinant FL BabA. A.L. produced expression constructs. J.B. purified native BabA, and performed IF-microscopy and crosslinking experiments. A.S. performed RIA experiments. M.M. and J.N. isolated and characterized S831 derivatives. K.B. performed ProteOn experiments. G.V. performed MS analysis of NAC titration. A.A., J.S., and T.B. supervised P.G., and T.N. supervised M.F. S.O. and M.L. produced hepta-BLe<sup>b</sup> and Le<sup>b</sup>-HSA. T.B. and H.R. conceived and supervised the study, with contributions from all authors. K.M., P.G., D.B., J.B., T.B., and H.R. wrote the paper.

## ACKNOWLEDGMENTS

We thank Ayla Debraekeleer and Joemar Taganna for assistance in recombinant protein production and figure preparation, respectively, and Lori M.

Hansen for help in constructing *H. pylori* chromosomal mutant (JS). We acknowledge the use of the synchrotron-radiation facility at Diamond Light Source, Didcot, UK, under proposal MX9426 and the Soleil synchrotron, Gif-sur-Yvette, France, under proposal 20131370; access support from the European Community's Seventh Framework Program (FP7/2007-2013) under BioStruct-X (grant agreement number 6601). This work is supported by project grant PRJ9 from the Flanders Institute of Biotechnology (VIB), the Odysseus program of the Flanders Science Foundation (FWO), and equipment grant UABR/09/005 from the Hercules Foundation. K.M. and S.S. are recipients of an FWO postdoc, and Erasmus Mundus PhD fellowship, respectively. T.B., L.H., and A.A. are supported by grants from Vetenskapsrådet/VR and Cancerfonden, and T.B. is supported by the J.C. Kempe and Seth M. Kempe Memorial Foundation and the Knut and Alice Wallenberg Foundation (2012.0090); work was in part performed within the Umeå Centre for Microbial Research (UCMR) and the Biochemical Imaging Center Umeå (BICU).

Received: July 24, 2015

Revised: November 16, 2015

Accepted: December 17, 2015

Published: January 13, 2016

## REFERENCES

Aird, I., Bentall, H.H., Mehigan, J.A., and Roberts, J.A.F. (1954). The blood groups in relation to peptic ulceration and carcinoma of colon, rectum, breast, and bronchus; an association between the ABO groups and peptic ulceration. *BMJ* 2, 315–321.

Alm, R.A., Bina, J., Andrews, B.M., Doig, P., Hancock, R.E., and Trust, T.J. (2000). Comparative genomics of *Helicobacter pylori*: analysis of the outer membrane protein families. *Infect. Immun.* 68, 4155–4168.

Aspholm, M., Kalia, A., Ruhl, S., Schedin, S., Arnqvist, A., Lindén, S., Sjöström, R., Gerhard, M., Semino-Mora, C., Dubois, A., et al. (2006). *Helicobacter pylori* adhesion to carbohydrates. *Methods Enzymol.* 417, 293–339.

Aspholm-Hurtig, M., Dailide, G., Lahmann, M., Kalia, A., Ilver, D., Roche, N., Vikström, S., Sjöström, R., Lindén, S., Bäckström, A., et al. (2004). Functional adaptation of BabA, the *H. pylori* ABO blood group antigen binding adhesin. *Science* 305, 519–522.

Boraston, A.B., Wang, D., and Burke, R.D. (2006). Blood group antigen recognition by a *Streptococcus pneumoniae* virulence factor. *J. Biol. Chem.* 281, 35263–35271.

Borén, T., Falk, P., Roth, K.A., Larson, G., and Normark, S. (1993). Attachment of *Helicobacter pylori* to human gastric epithelium mediated by blood group antigens. *Science* 262, 1892–1895.

Bry, L., Falk, P.G., Midtved, T., and Gordon, J.I. (1996). A model of host-microbial interactions in an open mammalian ecosystem. *Science* 273, 1380–1383.

Cammarota, G., Branca, G., Ardito, F., Sanguinetti, M., Ianiro, G., Cianci, R., Torelli, R., Masala, G., Gasbarrini, A., Fadda, G., et al. (2010). Biofilm demolition and antibiotic treatment to eradicate resistant *Helicobacter pylori*: a clinical trial. *Clin. Gastroenterol. Hepatol.* 8, 817–820.

Choi, J.-M., Hutson, A.M., Estes, M.K., and Prasad, B.V.V. (2008). Atomic resolution structural characterization of recognition of histo-blood group antigens by Norwalk virus. *Proc. Natl. Acad. Sci. USA* 105, 9175–9180.

Falk, P.G., Bry, L., Holgersson, J., and Gordon, J.I. (1995). Expression of a human alpha-1,3/4-fucosyltransferase in the pit cell lineage of FVB/N mouse stomach results in production of Leb-containing glycoconjugates: a potential transgenic mouse model for studying *Helicobacter pylori* infection. *Proc. Natl. Acad. Sci. USA* 92, 1515–1519.

Gerhard, M., Lehn, N., Neumayer, N., Borén, T., Rad, R., Schepp, W., Miehke, S., Classen, M., and Prinz, C. (1999). Clinical relevance of the *Helicobacter pylori* gene for blood-group antigen-binding adhesin. *Proc. Natl. Acad. Sci. USA* 96, 12778–12783.

Gregg, K.J., Finn, R., Abbott, D.W., and Boraston, A.B. (2008). Divergent modes of glycan recognition by a new family of carbohydrate-binding modules. *J. Biol. Chem.* 283, 12604–12613.

Guruge, J.L., Falk, P.G., Lorenz, R.G., Dans, M., Wirth, H.P., Blaser, M.J., Berg, D.E., and Gordon, J.I. (1998). Epithelial attachment alters the outcome of *Helicobacter pylori* infection. *Proc. Natl. Acad. Sci. USA* 95, 3925–3930.

Hage, N., Howard, T., Phillips, C., Brassington, C., Overman, R., Debreczeni, J., Gellert, P., Stolnik, S., Winkler, G.S., and Falcone, F.H. (2015). Structural basis of Lewis(b) antigen binding by the *Helicobacter pylori* adhesin BabA. *Sci. Adv.* 1, e1500315.

Hatakeyama, M., and Higashi, H. (2005). *Helicobacter pylori* CagA: a new paradigm for bacterial carcinogenesis. *Cancer Sci.* 96, 835–843.

Hogg, P.J. (2003). Disulfide bonds as switches for protein function. *Trends Biochem. Sci.* 28, 210–214.

Holmner, A., Askarieh, G., Ökvist, M., and Krengel, U. (2007). Blood group antigen recognition by *Escherichia coli* heat-labile enterotoxin. *J. Mol. Biol.* 371, 754–764.

Ilver, D., Arnqvist, A., Ogren, J., Frick, I.M., Kersulyte, D., Incecik, E.T., Berg, D.E., Covacci, A., Engstrand, L., and Borén, T. (1998). *Helicobacter pylori* adhesin binding fucosylated histo-blood group antigens revealed by retagging. *Science* 279, 373–377.

Ishijima, N., Suzuki, M., Ashida, H., Ichikawa, Y., Kanegae, Y., Saito, I., Borén, T., Haas, R., Sasakawa, C., and Mimuro, H. (2011). BabA-mediated adherence is a potentiator of the *Helicobacter pylori* type IV secretion system activity. *J. Biol. Chem.* 286, 25256–25264.

Kang, J., and Blaser, M.J. (2006). Bacterial populations as perfect gases: genomic integrity and diversification tensions in *Helicobacter pylori*. *Nat. Rev. Microbiol.* 4, 826–836.

Kawakubo, M., Ito, Y., Okimura, Y., Kobayashi, M., Sakura, K., Kasama, S., Fukuda, M.N., Fukuda, M., Katsuyama, T., and Nakayama, J. (2004). Natural antibiotic function of a human gastric mucin against *Helicobacter pylori* infection. *Science* 305, 1003–1006.

Mahdavi, J., Sondén, B., Hurtig, M., Olfat, F.O., Forsberg, L., Roche, N., Angstrom, J., Larsson, T., Teneberg, S., Karlsson, K.-A., et al. (2002). *Helicobacter pylori* SabA adhesin in persistent infection and chronic inflammation. *Science* 297, 573–578.

Makipour, K., and Friedenberg, F.K. (2011). The potential role of N-acetylcysteine for the treatment of *Helicobacter pylori*. *J. Clin. Gastroenterol.* 45, 841–843.

Mollicone, R., Bara, J., Le Pendu, J., and Oriol, R. (1985). Immunohistologic pattern of type 1 (Lea, Leb) and type 2 (X, Y, H) blood group-related antigens in the human pyloric and duodenal mucosae. *Lab. Invest.* 53, 219–227.

Pang, S.S., Nguyen, S.T.S., Perry, A.J., Day, C.J., Panjkar, S., Tiralongo, J., Whisstock, J.C., and Kwok, T. (2014). The three-dimensional structure of the extracellular adhesion domain of the sialic acid-binding adhesin SabA from *Helicobacter pylori*. *J. Biol. Chem.* 289, 6332–6340.

Peek, R.M., Jr., and Blaser, M.J. (2002). *Helicobacter pylori* and gastrointestinal tract adenocarcinomas. *Nat. Rev. Cancer* 2, 28–37.

Polk, D.B., and Peek, R.M., Jr. (2010). *Helicobacter pylori*: gastric cancer and beyond. *Nat. Rev. Cancer* 10, 403–414.

Posselt, G., Backert, S., and Wessler, S. (2013). The functional interplay of *Helicobacter pylori* factors with gastric epithelial cells induces a multi-step process in pathogenesis. *Cell Commun. Signal.* <http://dx.doi.org/10.1186/1478-811X-11-77>.

Prinz, C., Schöniger, M., Rad, R., Becker, I., Keiditsch, E., Wagenpfeil, S., Classen, M., Rösch, T., Schepp, W., and Gerhard, M. (2001). Key importance of the *Helicobacter pylori* adherence factor blood group antigen binding adhesin during chronic gastric inflammation. *Cancer Res.* 61, 1903–1909.

Rautelin, H., Blomberg, B., Fredlund, H., Järnerot, G., and Danielsson, D. (1993). Incidence of *Helicobacter pylori* strains activating neutrophils in patients with peptic ulcer disease. *Gut* 34, 599–603.

Solnick, J.V., Hansen, L.M., Canfield, D.R., and Parsonnet, J. (2001). Determination of the infectious dose of *Helicobacter pylori* during primary and secondary infection in rhesus monkeys (*Macaca mulatta*). *Infect. Immun.* 69, 6887–6892.

Subedi, S., Moonens, K., Romão, E., Lo, A., Vandenbussche, G., Bugaytsova, J., Muyldermans, S., Borén, T., and Remaut, H. (2014). Expression, purification

- and X-ray crystallographic analysis of the *Helicobacter pylori* blood group antigen-binding adhesin BabA. *Acta Crystallogr. F Struct. Biol. Commun.* 70, 1631–1635.
- Suerbaum, S., and Josenhans, C. (2007). *Helicobacter pylori* evolution and phenotypic diversification in a changing host. *Nat. Rev. Microbiol.* 5, 441–452.
- Tan, S., Noto, J.M., Romero-Gallo, J., Peek, R.M., Jr., and Amieva, M.R. (2011). *Helicobacter pylori* perturbs iron trafficking in the epithelium to grow on the cell surface. *PLoS Pathog.* 7, e1002050.
- Windle, H.J., Fox, A., Ní Eidhin, D., and Kelleher, D. (2000). The thioredoxin system of *Helicobacter pylori*. *J. Biol. Chem.* 275, 5081–5089.
- Younson, J., O'Mahony, R., Liu, H., Basset, C., Grant, S., Campion, C., Jennings, L., Vaira, D., Kelly, C.G., Roitt, I.M., and Holton, J. (2009). A human domain antibody and Lewis b glycoconjugate that inhibit binding of *Helicobacter pylori* to Lewis b receptor and adhesion to human gastric epithelium. *J. Infect. Dis.* 200, 1574–1582.

Cell Host & Microbe

Supplemental Information

## **Structural Insight into Polymorphic**

### **ABO Glycan Binding by *Helicobacter pylori***

**Kristof Moonens, Pär Gideonsson, Suresh Subedi, Jeanna Bugaytsova, Ema Romaõ, Melissa Mendez,, Jenny Nordén Mahsa Fallah, Lena Rakhimova, Anna Shevtsova, Martina Lahmann, Gaetano Castaldo, Kristoffer Brännström, Fanny Coppens, Alvin W. Lo, Tor Ny, Jay V. Solnick, Guy Vandebussche, Stefan Oscarson, Lennart Hammarström, Anna Arnvist, Douglas E. Berg, Serge Muyldermans, Thomas Borén, and Han Remaut**

**Figure S1**

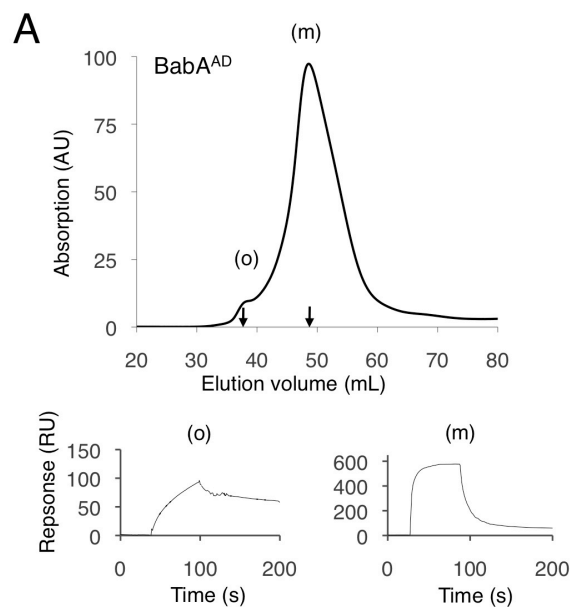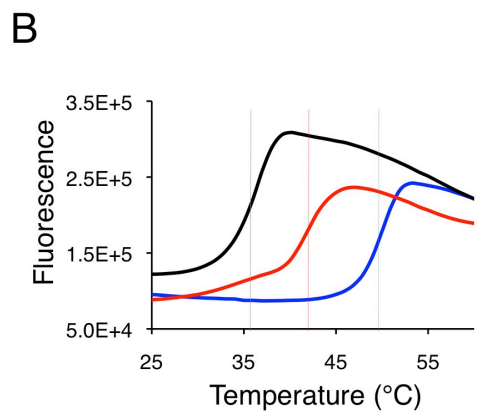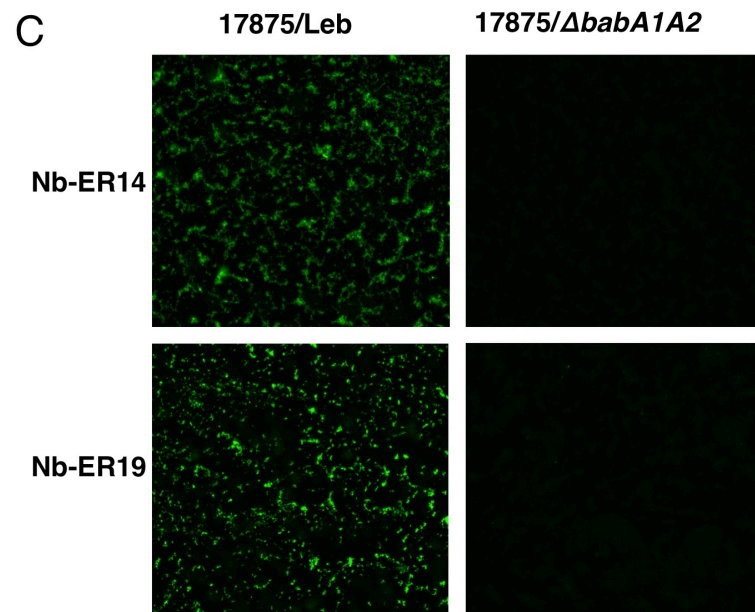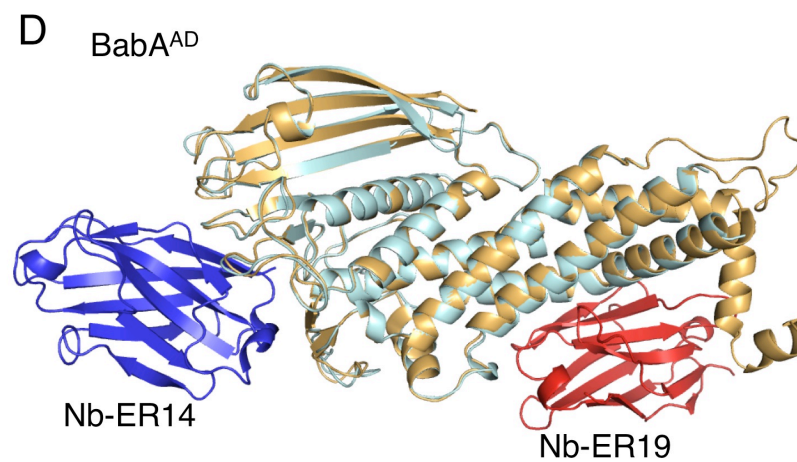





Figure S3

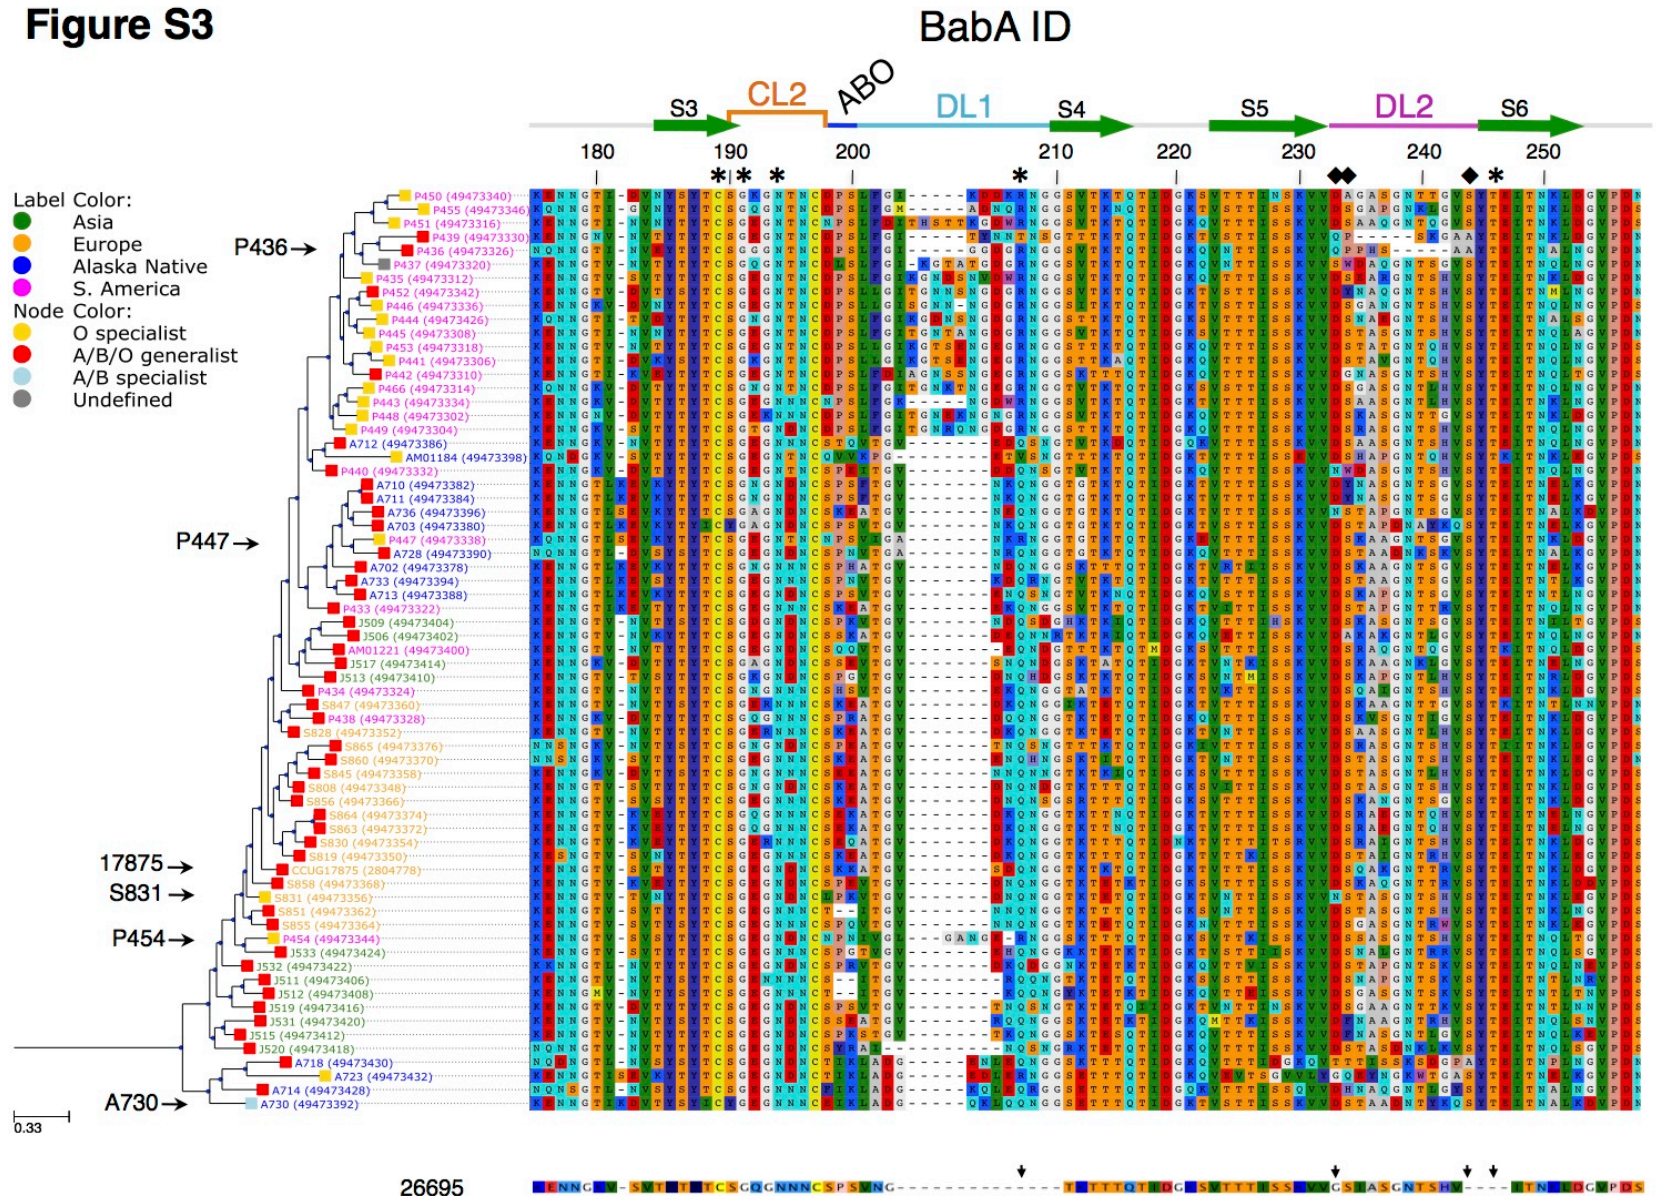

26695

**Figure S4**

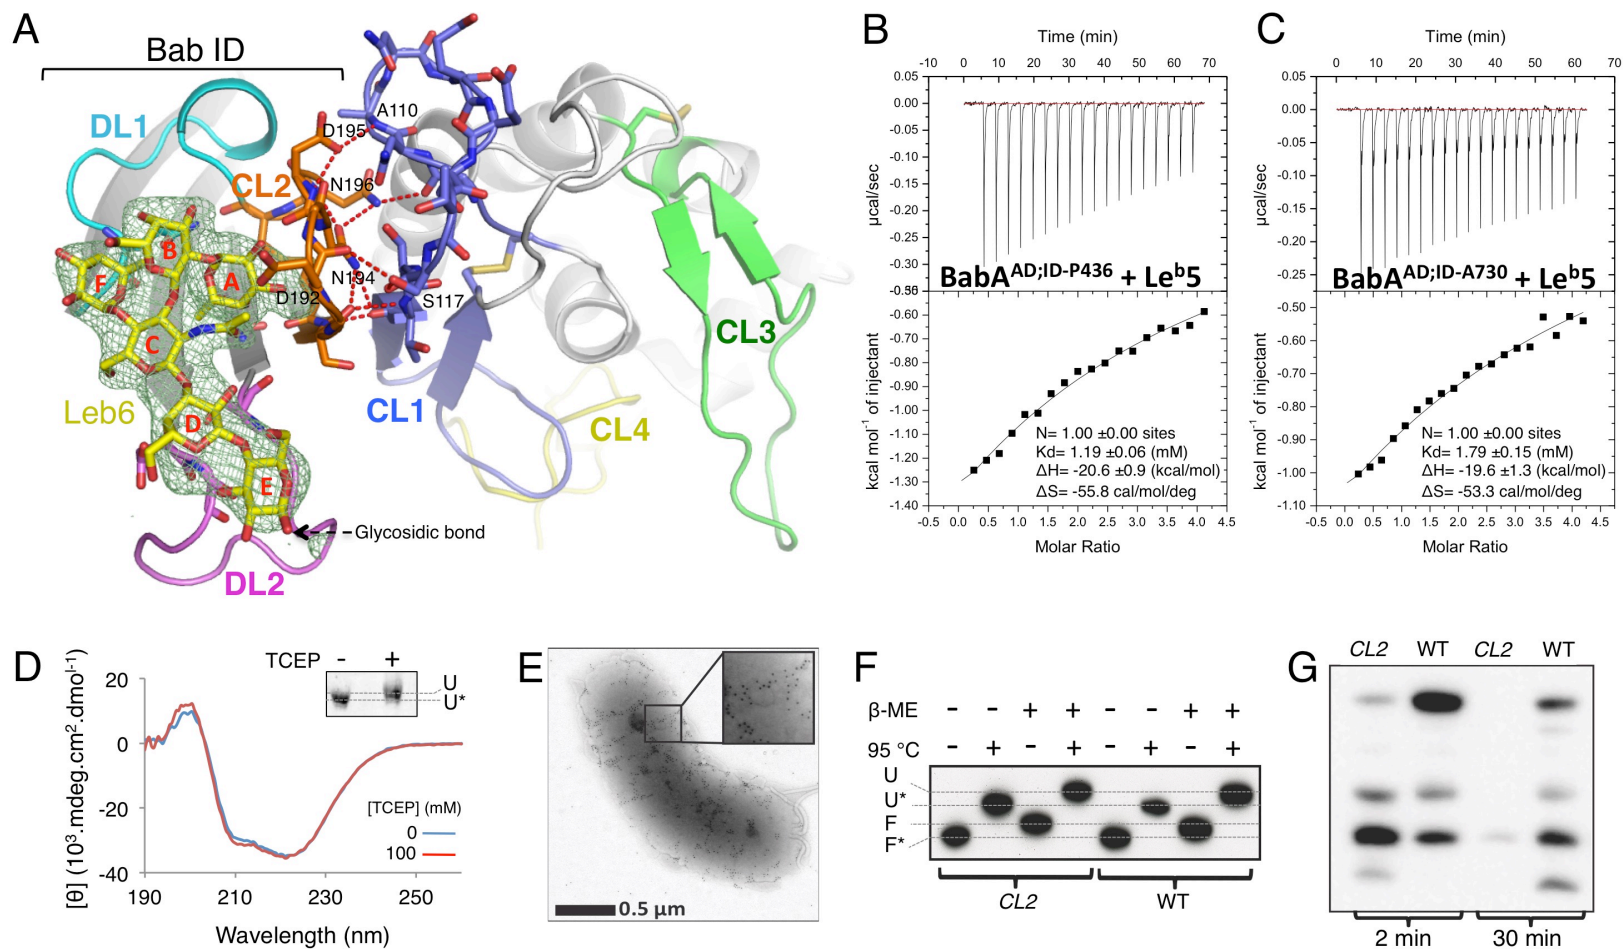

# Figure S5

## A 17875/Leb adherence to NAC-treated gastric tissue

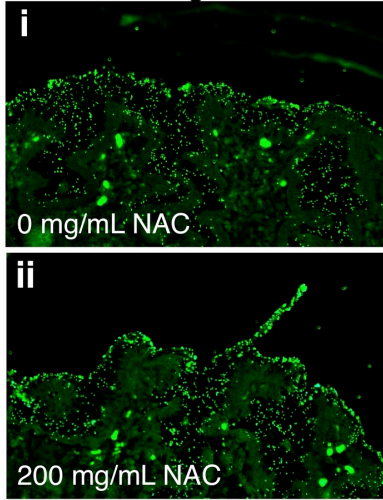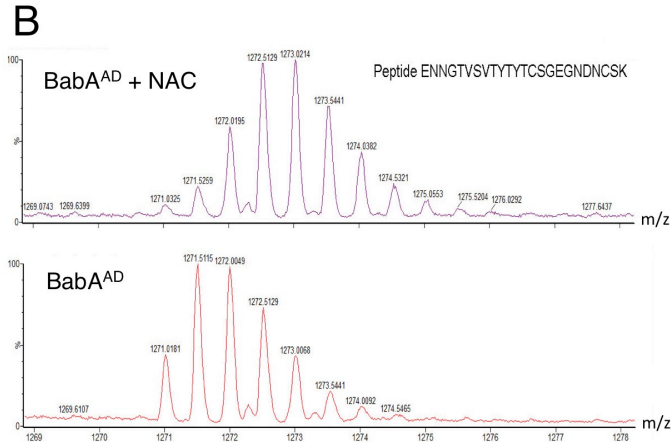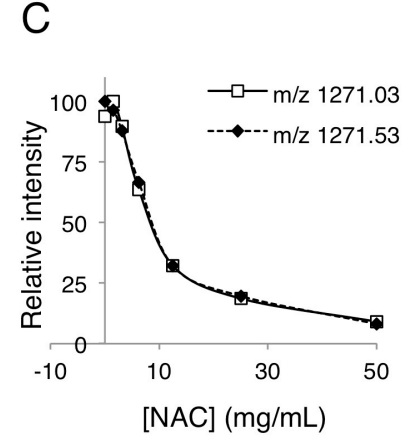

## D *H. pylori* epithelial adherence

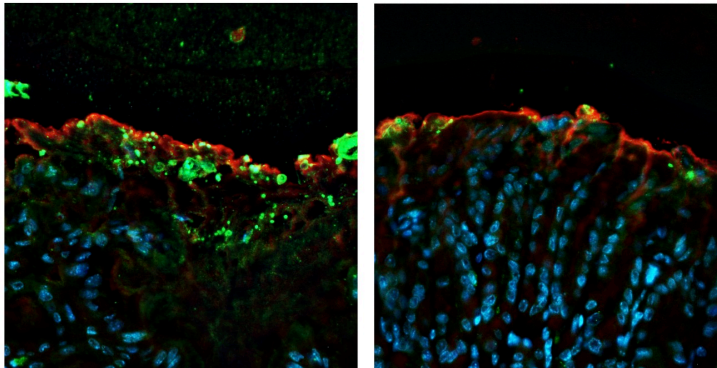

## E Neutrophil recruitment (Ly6G MAb)

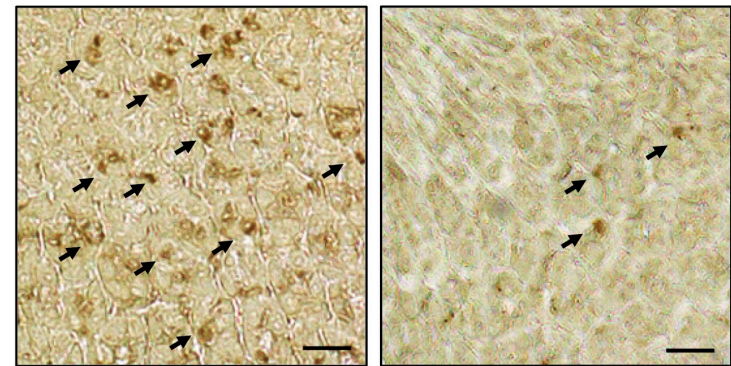

**Figure S6**

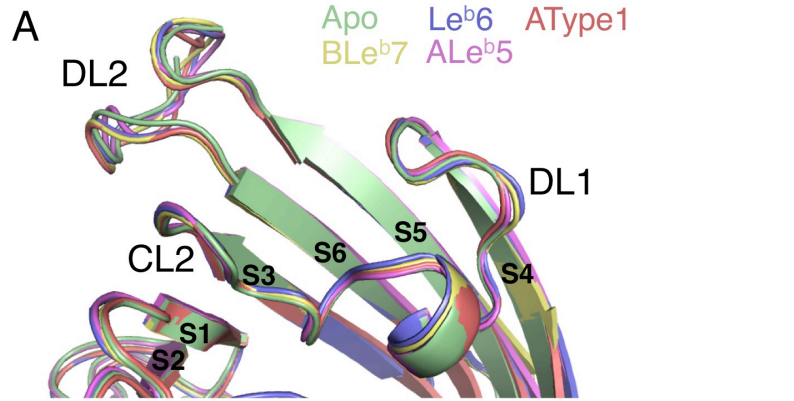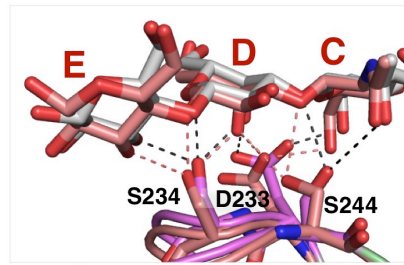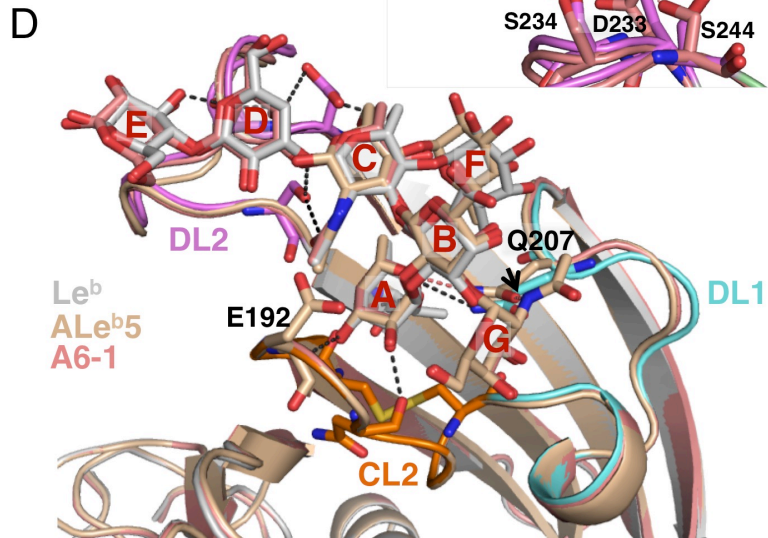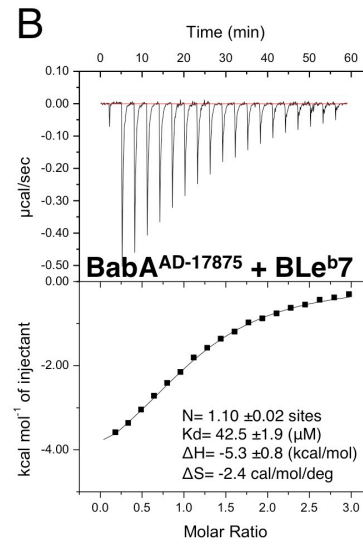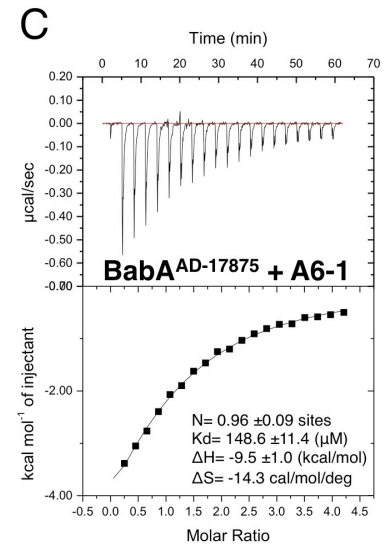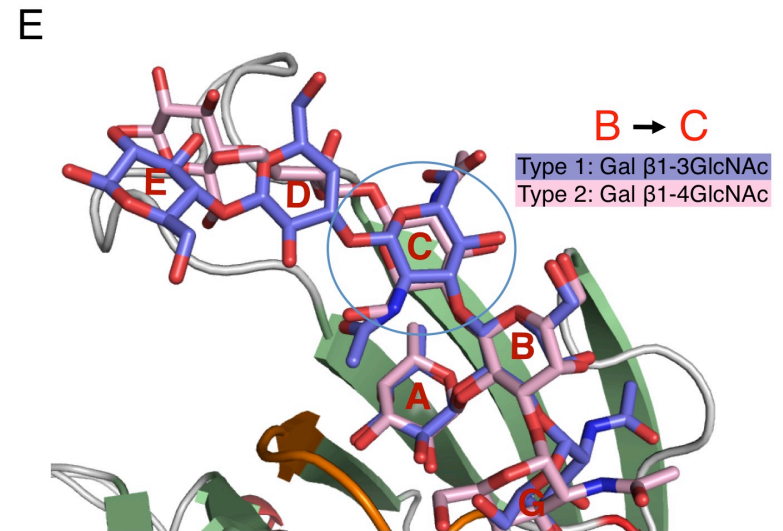

**Figure S7**

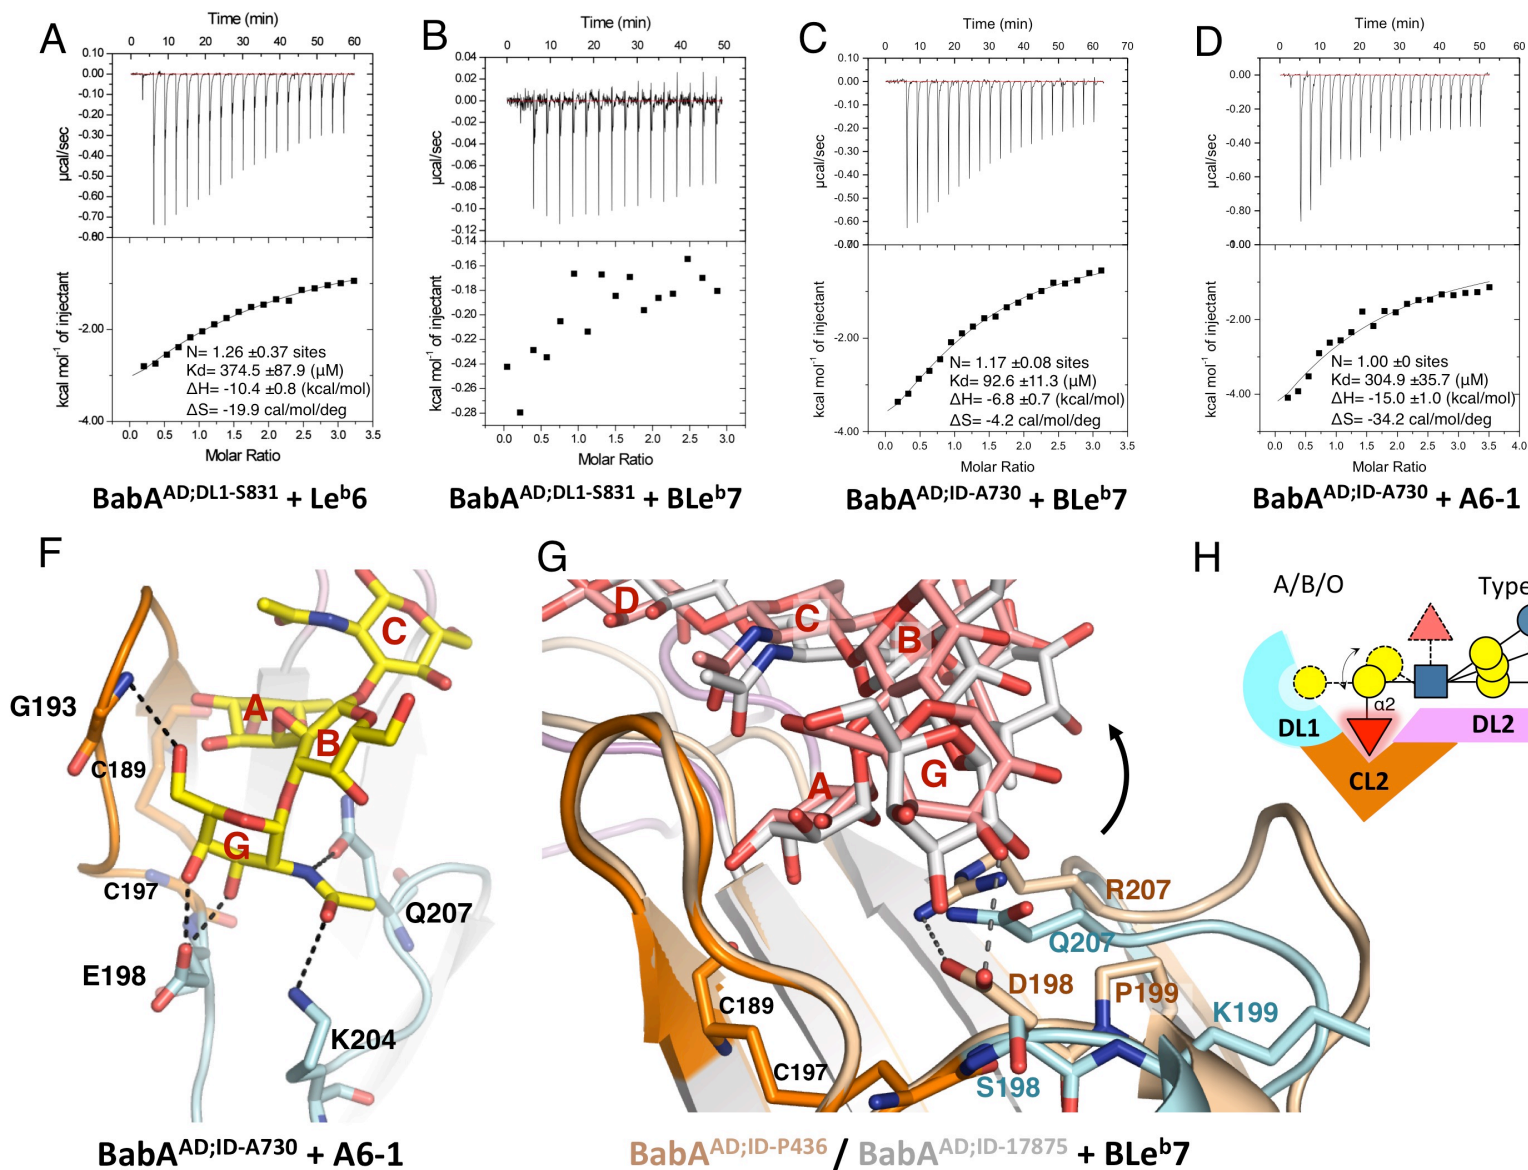

## SUPPLEMENTARY FIGURES LEGENDS

### Figure S1 - related to Figure 1: Nanobodies recognize native BabA and stabilize BabA<sup>AD</sup>.

**(A)** Top: SEC profile of purified BabA<sup>AD</sup> reveals the presence of an oligomeric (o) and monomeric (m) species. Bottom: SPR sensorgrams of fresh SEC fractions corresponding to oligomeric (o) and monomeric BabA<sup>AD</sup> (m) (indicated with arrows) reveal a slow and fast dissociating species, respectively. Interstitial fractions show a gradient of bipartite dissociation profiles with increasing contribution of fast versus slow dissociation species reflecting increasing (m)/(o) ratios when moving towards longer elution volumes (not shown). At equilibrium, concentrated BabA<sup>AD</sup> samples show bipartite SPR dissociation profiles reflecting a mixed (o) and (m) population (Figure 1B). **(B)** Thermal unfolding curves of BabA<sup>AD</sup> (black), BabA<sup>AD</sup>:Nb-ER14 (blue) and BabA<sup>AD</sup>:Nb-ER19 (red) as monitored by SYPRO orange fluorescence in function of temperature. Nb-ER14 and Nb-ER19 increase melting mid temperature (T<sub>m</sub>) with 13 and 6 °C, respectively. **(C)** *In vitro* adherence assay of FITC labeled nanobodies Nb-ER14 and Nb-ER19 to *H. pylori* strain 17875 and an isogenic *babA1/babA2* knock-out. Both nanobodies efficiently and specifically recognize functional full length BabA expressed on *H. pylori* cells. **(D)** Overlay of the BabA<sup>AD</sup>:Nb-ER14 (lightblue:blue) and BabA<sup>AD</sup>:Nb-ER19 (gold:red) structures in ribbon representation. Both Nb-ER14 and Nb-ER19 bind regions with increased thermal displacement factors and local disorder, indicating zones with increased conformational dynamics. The role of either nanobody in facilitating crystallization is by protein stabilization (see (B)), by reduction of local conformational flexibility, and by providing additional crystal contacts.

### Figure S2 - related to Figure 2: Domain architecture and secondary structure conservation within the HOP family.

**(A)** Multiple sequence alignment of members of the HOP family members with a predicted secondary structure topology homologous to that found in BabA. Conserved  $\alpha$ -helices of the BabA core domain are indicated by green bars over the sequence and named H1 to H10 as in Figure 1. **(B)** The BabA (colored according to chain) and SabA adhesin domains (pale green; PDB: 405J) superimpose with a root mean squared deviation (RMSD) of 2.3 Å for 240 equivalent Ca atoms. Conserved helices in the HOP family are named and the N- and C- termini of the SabA adhesin domain are indicated.

### Figure S3 - related to Figure 3: Sequence polymorphism in the BabA insertion domain.

MSA of the BabA ID from various *H. pylori* strains with known generalist / specialist profile and geographic background (Aspholm-Hurtig et al., 2004). The geographical origin of the strains is indicated together with the distribution in specialist (only binding O antigen), generalist (binding A/B/O antigens) or undefined (<1 % Le<sup>b</sup> RIA binding) strains. Secondary structure

matching the sequence stretches and the region important for Le<sup>b</sup> binding are shown above the alignment (asterisks:  $\alpha$ 1-2 fucose binding pocket; diamonds: type 1 core binding region). CL2: Cys189/Cys197-loop, DL: Diversification Loop, ABO: specialist/generalist determining region. South American strains are predominantly of specialist phenotype. These strains show the specialist Asn/Asp/Leu-Pro signature in position 198-199, as well as the substitution of Asn207 with an Arg and the frequent occurrence of a ~7 residue insertion in DL1. The role of these latter two sequence signatures is presently unknown. Four strains show an exceptional generalist phenotype despite a specialist Asp-Pro genotype (eg. P436, P439, P442 and P452; according (Aspholm-Hurtig et al., 2004)). The non-canonical generalist binding in these strains is the result from loss-of-function mutations in the DL2 site (see Figure S7F and discussion). Shown underneath the MSA is the BabA ID sequence for *babA* from TIGR reference genome of *H. pylori* 26695. This strain lost Le<sup>b</sup> adhesion due to mutations in the secretor fucose and type 1 chain binding sites (indicated with arrows).

**Figure S4 –related to Figure 4: Sequence conservation around the bg antigen binding site.**

**(A)** Overview of the interactions between CL1 in the 3+4-helix bundle domain and the BabA carbohydrate binding domain (color scheme as in Figure 3). Residues interacting with the bg antigens are shown in stick model and labeled; CL1 and CL2 are colored blue and orange, respectively. The side chains of the conserved Asn194 and Asp195 (N/D/T) do not directly interact with the Le<sup>b</sup> glycan, but likely provide additional conformational stability to the secretor fucose-binding CL2 by means of H-bonding with CL1. Panel includes electron density from a FoFc omit map contoured at 2.5  $\sigma$  and displayed around the Le<sup>b</sup>6 ligand in pale green mesh. Le<sup>b</sup>6 is depicted in stick model and colored yellow, red and blue for respectively carbon, oxygen and nitrogen atoms. The arrow indicates the reducing end that will make the glycosidic bond to the neoglycoconjugate. **(B, C)** ITC injection heats (upper) and normalized binding isotherms (lower) of Le<sup>b</sup>5 titrations of 17875 BabA<sup>AD</sup> mutants in which the carbohydrate binding domain (BabA-ID, Figure S3) is replaced with that of strain P436 (B) or A730 (C). For both BabA isoforms, sequence substitutions in the DL2 region reduce monovalent binding affinities to low micromolar dissociation constants **(D)** Far UV CD spectra of 3 mg/mL BabA<sup>AD</sup> in absence (blue) and presence (red) of 100 mM TCEP show the adhesin domain retains its secondary structure content upon full reduction of its disulfide bonds. The upward mobility-shift of the TCEP-treated protein in coomassie-stained SDS-PAGE (inset) confirms disulfide reduction (U: unfolded – disulfide reduced, U\*: unfolded – disulfide bonded). **(E)** The J166CL2 mutant BabA protein was readily immuno-gold stained in whole cells, showing it is efficiently exported to the outer membrane. **(F)** Folding and disulfide formation in the J166CL2 mutant protein was confirmed by western blots of SDS solubilized whole cell protein extracts of WT and mutant strains: their

similar heat-modifiable appearance demonstrates folding of the BabA  $\beta$ -barrel (U: unfolded, F: folded), and faster migration of non-reduced (U\*, F\*) relative to reduced samples (U, F) indicates a compacted protein due to disulfide formation in CL1, CL3 and CL4. **(G)** The J166CL2 mutant showed increased protease sensitivity at 2 and 30 min of limited trypsinolysis, albeit with a cleavage pattern identical to that of WT protein. This implies a localized increase in structural flexibility rather than an overall loss of folding and conformation.

**Figure S5 – related to Figure 5: NAC treatment reduces bacterial binding by reduction of CL2.** **(A)** FITC labeled 17875/Leb bacteria binding to human gastric tissue sections, after a 2 hour pre-treatment of the sections with 0 (i) or 200 (ii) mg/mL NAC shows NAC pre-treatment does not perturb the integrity of the gastric mucosa or the availability of *H. pylori* bg antigen binding sites. **(B)** Mass spectrometry analysis of trypsinized BabA<sup>AD</sup> with or without prior exposure to 50 mg/mL N-acetylcysteine. The isotopic mass distribution profile for the double-charged Cys189/Cys197 disulfide containing peptide Glu176-Lys199 is shown. **(C)** Relative intensity of ESI-TOF species with m/z values corresponding an oxidized CL2 loop (fragment 176-199) released after tryptic digestion of BabA<sup>AD</sup> exposed to an increasing concentration of N-acetylcysteine. **(D)** Example gastric epithelium sections of mice treated for 2 weeks with 0 (-) or 40 (+) mg/day NAC in their drinking water, shown to visualize how *H. pylori* epithelial adherence (Figure 5C) was estimated. Antibody-staining reveals *H. pylori* in green (anti-*H. pylori*), Lewis b in red (anti-Le<sup>b</sup> antibodies) and nuclei of mouse tissue cells in blue (DAPI). **(E)** Representative immunohistostained (anti-Ly6G antibodies) gastric sections of mice treated or non-treated with NAC, used to determine neutrophil infiltration. See extended experimental procedures section 7 for details on neutrophil and *H. pylori* infectious load in the epithelial proximity.

**Figure S6 – related to Figure 6: BabA<sup>AD</sup> binding to ABO blood group antigens**

**(A)** Overlay of the CBD's in the X-ray structures of apo BabA<sup>AD</sup>:Nb-ER19 (green) as well as BabA<sup>AD</sup>:Nb-ER19 in complex with Le<sup>b</sup>6 (blue), BLe<sup>b</sup>7 (yellow), ALe<sup>b</sup>5 (violet) and the A type 1 hexasaccharide A6-1 (brick), shows the high degree of conformational constraint on CL2. **(B, C)** ITC injection heats (upper) and normalized binding isotherms (lower) of BabA<sup>AD</sup>:Nb-ER19 titrated with BLe<sup>b</sup>7 (B) or A6-1 (C). **(D)** Overlay of the BabA<sup>AD</sup>:Le<sup>b</sup>6 complex (colored as Figure 3B) and the BabA<sup>AD</sup> in complex with ALe<sup>b</sup>5 (Table S1; tan) or A6-1 (Table S1; brick). Side chain representation and H-bond labeling as Figure 6. Arrows highlight bg A specific H-bonding. In the Inset: in the A6-1 complex, the interaction of the type 1 chain core interacts with the Asp-Ser-Ser triad through an alternative H-bonding pattern compared to Le<sup>b</sup>6 or BLe<sup>b</sup>7 (not shown), possibly due to a slight reorganization of the type 1 chain core as a result of the lack of the Lewis fucose in



the A6-1 glycan. **(E)** Overlay of the BabA<sup>AD</sup>:Nb-ER19 structure in complex with A6-1 with an energy minimized model (Glycam) of the A type 2 core hexasaccharide. Type 1 and type 2 core glycans differ in having a  $\beta$ 1-3 versus  $\beta$ 1-4 Gal-GlcNAc linkage (residue B to C, Table S1). The accompanying reorientation of the type 2 core reducing end breaks up the H-bond network with the Asp233-Ser234-Ser244 triad and creates a steric clash with the BabA DL2 loop.

**Figure S7 – related to Figure 7: Exchange of the 17875 DL1 loop with strain S831 sequence alters bg polymorphism (A, B)** ITC injection heats (upper) and normalized binding isotherms (lower) of S831 DL1 graft mutant BabA<sup>AD,DL1-S831</sup>:Nb-ER19 titrated with Leb<sup>6</sup> (A), or BLeb<sup>7</sup> (B). The S831 loop mutant loses binding towards the B antigen, while still retaining affinity for the H antigen. Compared to the native 17875, the S831 DL1 graft mutant shows a  $\sim$ 4.6 fold lower affinity for Leb<sup>6</sup>. The thermodynamic signature of the ITC data shows the lowered affinity stems from an increased entropic cost of Leb<sup>6</sup> binding to the S831 DL1 region compared to the 17875 parent (ie., -19.9 cal/mol/deg versus -13.8 cal/mol/deg, respectively), suggesting the S831 DL1 region is more conformationally dynamic prior to ligand binding than is the 17875 DL1. **(C, D)** ITC injection heats (upper) and normalized binding isotherms (lower) of the 17875 BabA<sup>AD</sup> grafted with the strain A730 CBD, titrated with BLeb<sup>7</sup> (C) or A6-1 (D). Increased H-bond formation of the A730 DL1 loop with the bg A or bg B GalNAc or Gal (see panel E) results in a  $\sim$ 20 and 6-fold increase in monovalent binding affinities compared to that of Leb<sup>b</sup> (Figure S4C). Thus A730 shows a bg A/B specialist type Leb<sup>b</sup> binding. **(E)** Close-up view of the DL1 region of the strain A730 CBD bound to A6-1. The altered sequence in the A730 DL1 results in the loss of the canonical  $\alpha$ -helical turn seen in strain 17875, S831 or P436 and results in its straightening into a hairpin loop (see also Figure 3B). The extended DL1 conformation allows improved contact with the bg A Gal by means of 5 H-bond interactions. For easy comparison, the labeled residues are numbered according the equivalent residue position in strain 17875. A730 is part of a small monophyletic cluster of Alaskan native isolates with a common DL1 “IKLADG” sequence in residues 199-204, which are expected to result in a similar extended DL1 conformation (Figure S3). In combination of a weaker binding interaction with the type 1 chain core at the DL2 site (Figure 3B), the increased interaction with the bg determinants at the DL1 site make A730 strain effectively an A/B specialist. **(F)** Structural comparison of strain P436 (tan) and strain 17875 (light grey; CL2, DL1 and DL2 colored orange, cyan and magenta, respectively) interacting with BLeb<sup>7</sup> (colored light red and grey in P436 and 17875, respectively). P436 holds the D198-P199 bg specialist genotype typical of South American Amerindian isolates, yet shows a generalist binding phenotype. D198 and R207 (numbered according equivalent position in the 17875 reference structure; Figure S3) are in an electrostatic interaction and are positioned inside the bg A GalNAc or bg B Gal substituent binding pocket that is seen in the 17875 BLeb<sup>7</sup> complex (this

figure and Figures 6 and 7A). In P436, loss of function mutations in DL2 (S234P and S244A) disrupt the interaction with the type 1 chain core (see also Figure 3B for the P436-Le<sup>b</sup>6 complex), which results in a  $\sim 10^\circ$  upward rotation of the BLe<sup>b</sup>7 around the secretor fucose (labeled A). The upward rotation of BLe<sup>b</sup>7 positions the bg B determining Gal (labeled G) above, rather than in steric clash with the D198-R207 pair, thus leading to a non-canonical generalist bg binding phenotype in this otherwise specialist genotype strain. Non-canonical generalist binding profiles in 3 additional SAA specialist genotype strains (Figure S3; strains P436, P439 and P452) is in each case accompanied with similar loss of function mutations in DL2, suggesting the compensatory rotation of the glycan is a common mechanism to circumvent specialist genotype in these strains. **(G)** Schematic representation of BabA's three-pronged ABO Le<sup>b</sup> / Type 1 binding site. The disulfide-clasped CL2 wraps the glycans' secretor fucose and forms the structurally conserve anchor point in the binding site. DL1 and DL2 are high sequence diversity regions that interact with the bg A or B substituents or type 1 chain reducing end, respectively. Amongst different clinical isolates, sequence variation in these regions result in various extends to which DL1 and DL2 contribute to the glycan interaction and provides a basis to the high divergence in ABO/Le<sup>b</sup> glycan binding affinities observed amongst isolates and populations (Aspholm-Hurtig et al., 2004). Variation in the DL1 region results in the observed bg preferences of the *H. pylori* isolates (see main text). Mutations in DL2 determine the extend to which the Le<sup>b</sup> type 1 chain core contributes to the binding interaction, tuning the binding affinity of the glycan, but also allowing compensatory reorientation of the glycan with respect to the DL1 bg preference determining site as seen in non-canonical generalist strain P437 (Figure S7F) or the bg A/B specialism as seen in Alaskan strain A730 (Figure S7E). Apart from altering the adhesins' binding properties, sequence diversity in DL1 and DL2 may create antigenic variation for the escape of neutralizing antibodies.

**Table S1: glycans used in this study, Figures 1-7**

|                                                                                                                                     |
|-------------------------------------------------------------------------------------------------------------------------------------|
| <b>Le<sup>b</sup>5</b><br>Fuca1-2Galβ1-3(Fuca1-4)GlcNAcβ1-3Gal                                                                      |
| <b>Le<sup>b</sup>6</b><br>Fuca1-2Galβ1-3(Fuca1-4)GlcNAcβ1-3Galβ1-4Glc                                                               |
| <b>BLe<sup>b</sup>7</b><br>Gala1-3(Fuca1-2)Galβ1-3(Fuca1-4)GlcNAcβ1-3Galβ1-4Glc                                                     |
| <b>ALe<sup>b</sup>5</b><br>GalNAca1-3(Fuca1-2)Galβ1-3(Fuca1-4)GlcNAc                                                                |
| <b>A6-1</b><br>GalNAca1-3(Fuca1-2)Galβ1-3GlcNAcβ1-3Galβ1-4Glc                                                                       |
| <b>Le<sup>b</sup>-HSA</b><br>Fuca1-2Galβ1-3(Fuca1-4)GlcNAcβ1-3Galβ1-4Glc-<br>conjugated to human serum albumin, average valency: 22 |
|                                                                                                                                     |

**type 1 chain ABO glycans (H and Le<sup>b</sup>)**

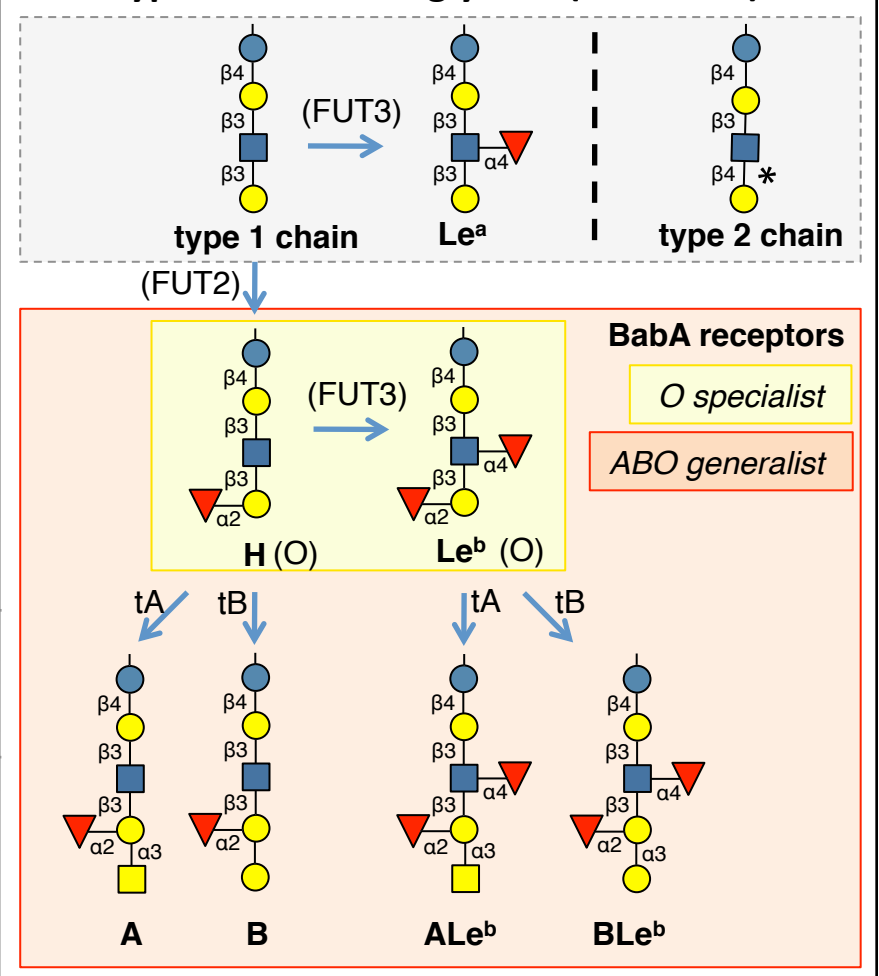

Structures and synthesis routes for type 1 chain ABO glycans (H and Le<sup>b</sup>) that form the BabA receptors on mucosal surfaces of the GI tract. The fucosylation required to obtain H and Le<sup>b</sup> antigens occurs on the terminal Gal of the type 1 lacto-series glycan chain. This addition depends on the secretor transferase (FUT2) for the glycans in the saliva, GI mucus secretions and epithelia. A majority of individuals express the secretor enzyme and are fittingly called “secretors”. When an α1-4 branched fucose is also added to the core GlcNAc (by FUT3, the Lewis transferase), the Le<sup>b</sup> phenotype is expressed. Thus bg O can both constitute the H antigen with only the terminal α1-2 fucose or the Le<sup>b</sup> antigen with both the terminal and the α1-4 branched fucoses. These structures form the target glycans for the bg A and B transferases (tA, tB, respectively) that add GalNAc or Gal, respectively, to obtain the A/ALe<sup>b</sup> or B/BLe<sup>b</sup> bg’s. BabA is polymorphic in bg specificity (Aspholm-Hurtig *et al.* 2004), *specialist* BabA bind H and Le<sup>b</sup> glycans, *generalist* BabA bind in addition their tA and tB modified derivatives (A, B, ALe<sup>b</sup> and BLE<sup>b</sup>). In case of non-secretors (ie. individuals lacking FUT2 activity), FUT3 activity on the type 1 core glycan results in Le<sup>a</sup>, which is not recognized by BabA. Type 2 chain ABO glycans have a β1-4 Gal-GlcNAc linkage (\*) and result in type 2 H and Le<sup>y</sup> glycans after FUT2 and FUT3 activity (not shown).

**Table S2**  
**Figures 2, 3, 6, 7**

|                                          | BabA <sup>AD</sup> :Nb-ER14     | BabA <sup>AD</sup> :Nb-ER19 | BabA <sup>AD</sup> :Nb-ER19<br>+Le <sup>b</sup> 6 | BabA <sup>AD</sup> :Nb-ER19<br>+ ALe <sup>b</sup> 5 | BabA <sup>AD</sup> :Nb-ER19<br>+ BLe <sup>b</sup> 7 | BabA <sup>AD</sup> :Nb-ER19<br>+ A6-1 | S831:Nb-ER19         | S831:Nb-ER19<br>+ Le <sup>b</sup> 6 |
|------------------------------------------|---------------------------------|-----------------------------|---------------------------------------------------|-----------------------------------------------------|-----------------------------------------------------|---------------------------------------|----------------------|-------------------------------------|
| <b>Data collection</b>                   |                                 |                             |                                                   |                                                     |                                                     |                                       |                      |                                     |
| Wavelength                               | 0.9791                          | 0.97949                     | 0.96863                                           | 0.96863                                             | 0.96863                                             | 0.96863                               | 0.9786               | 1.0332                              |
| Beamline                                 | PROXIMA-2a                      | I04                         | I24                                               | I24                                                 | I24                                                 | I24                                   | PROXIMA-1            | PROXIMA-1                           |
| Space group                              | P 2 <sub>1</sub> 2 <sub>1</sub> | P 1 2 <sub>1</sub> 1        | P 1 2 <sub>1</sub> 1                              | P 1 2 <sub>1</sub> 1                                | P 1 2 <sub>1</sub> 1                                | P 1 2 <sub>1</sub> 1                  | P 1 2 <sub>1</sub> 1 | P 1 2 <sub>1</sub> 1                |
| a, b, c (Å)                              | 42.4, 133.7, 201.6              | 51.0, 131.7, 123.5          | 51.1, 131.9, 123.1                                | 50.9, 132.0, 123.8                                  | 51.1, 132.4, 123.5                                  | 50.9, 131.7, 123.6                    | 51.0, 132.1, 123.5   | 50.8, 131.9, 125.4                  |
| α, β, γ (°)                              | 90.0, 90.0, 90.0                | 90.0, 94.8, 90.0            | 90.0, 94.8, 90.0                                  | 90.0, 94.8, 90.0                                    | 90.0, 94.9, 90.0                                    | 90.0, 94.7, 90.0                      | 90.0, 94.9, 90.0     | 90.0, 94.9, 90.0                    |
| Resolution range (Å)                     | 47.4-2.7 (2.88-2.74)            | 58.0-2.2 (2.23-2.17)        | 45.0-2.7 (2.89-2.72)                              | 33.2-2.3 (2.34-2.28)                                | 43.2-2.8 (2.88-2.81)                                | 34.9-2.4 (2.5-2.44)                   | 48.5-2.6 (2.73-2.59) | 48.4-2.4 (2.58-2.44)                |
| Total reflections                        | 180,907 (25,007)                | 381,170 (29,608)            | 172,232 (27,643)                                  | 410,606 (29,639)                                    | 183,559 (13,516)                                    | 336,380 (24,962)                      | 179,275 (19,600)     | 338,859 (44,415)                    |
| Unique reflections                       | 31,163 (4,300)                  | 85,215 (6,359)              | 43,591 (7,029)                                    | 72,982 (5,310)                                      | 39,799 (2,905)                                      | 60,096 (4,387)                        | 49,587 (6,580)       | 60,611 (8,600)                      |
| CC(1/2)                                  | 99.5 (91.7)                     | 99.6 (72.3)                 | 98.2 (50.4)                                       | 99.7 (66.4)                                         | 99.6 (61.4)                                         | 99.6 (54.5)                           | 99.6 (53.9)          | 99.6 (60.3)                         |
| R <sub>merge</sub> (%)                   | 13.9 (55.5)                     | 4.6 (61.3)                  | 16.0 (91.6)                                       | 7.9 (74.3)                                          | 8.0 (75.1)                                          | 9.5 (78.6)                            | 8.5 (79.1)           | 9.2 (97.0)                          |
| R <sub>p.i.m.</sub> (%)                  | 6.3 (25.2)                      | 3.7 (48.3)                  | 9.5 (55.9)                                        | 5.3 (51.5)                                          | 6.1 (57.8)                                          | 6.8 (55.9)                            | 5.1 (51.7)           | 4.3 (46.9)                          |
| Average I/σ                              | 7.9 (2.7)                       | 15.6 (2.2)                  | 6.7 (2.6)                                         | 12.0 (2.2)                                          | 12.5 (1.8)                                          | 10.6 (2.2)                            | 9.4 (1.3)            | 10.1 (1.5)                          |
| Completeness (%)                         | 99.3 (95.8)                     | 99.4 (100.0)                | 99.8 (99.8)                                       | 98.6 (97.9)                                         | 99.7 (99.9)                                         | 99.7 (99.7)                           | 97.7 (89.1)          | 99.5 (97.0)                         |
| Multiplicity                             | 5.8 (5.8)                       | 4.5 (4.7)                   | 4.0 (3.9)                                         | 5.6 (5.6)                                           | 4.6 (4.7)                                           | 5.6 (5.7)                             | 3.6 (3.0)            | 5.6 (5.2)                           |
| Wilson B-factor                          | 38.1                            | 40.4                        | 38.1                                              | 44.7                                                | 59.6                                                | 44.7                                  | 77.1                 | 70.6                                |
| <b>Refinement</b>                        |                                 |                             |                                                   |                                                     |                                                     |                                       |                      |                                     |
| R <sub>work</sub> /R <sub>free</sub> (%) | 21.22 / 26.49                   | 17.07 / 20.65               | 17.90 / 21.76                                     | 17.08 / 19.71                                       | 17.07 / 20.75                                       | 17.57 / 20.51                         | 19.47 / 23.03        | 18.91 / 21.91                       |
| average B-factor (Å <sup>2</sup> )       | 27.1                            | 35.8                        | 27.6                                              | 36.0                                                | 45.5                                                | 37.7                                  | 46.0                 | 35.7                                |
| R.m.s. deviations                        |                                 |                             |                                                   |                                                     |                                                     |                                       |                      |                                     |
| Bond lengths (Å)                         | 0.013                           | 0.019                       | 0.015                                             | 0.019                                               | 0.014                                               | 0.017                                 | 0.014                | 0.016                               |
| Bond angles (°)                          | 1,600                           | 1,859                       | 1,646                                             | 1,863                                               | 1,622                                               | 1,741                                 | 1,595                | 1,773                               |
| No. Atoms (non H)                        |                                 |                             |                                                   |                                                     |                                                     |                                       |                      |                                     |
| Protein                                  | 7445                            | 8031                        | 7974                                              | 7976                                                | 7970                                                | 7979                                  | 7972                 | 7986                                |
| Carbohydrate                             | -                               | -                           | 136                                               | 120                                                 | 158                                                 | 144                                   | -                    | 136                                 |
| Water                                    | 88                              | 481                         | 150                                               | 227                                                 | 48                                                  | 137                                   | 52                   | 102                                 |
| <b>Ramachandran</b>                      |                                 |                             |                                                   |                                                     |                                                     |                                       |                      |                                     |
| Favoured (%)                             | 93.77                           | 95.59                       | 94.21                                             | 95.61                                               | 93.82                                               | 95.99                                 | 94.21                | 94.85                               |
| Allowed (%)                              | 5.01                            | 3.16                        | 4.55                                              | 3.63                                                | 4.85                                                | 3.44                                  | 4.37                 | 3.91                                |
| Outliers (%)                             | 1.23                            | 1.25                        | 1.23                                              | 0.76                                                | 1.33                                                | 0.57                                  | 1.42                 | 1.24                                |
| <b>MolProbity score</b>                  | 2.26                            | 1.71                        | 1.81                                              | 1.73                                                | 1.71                                                | 1.59                                  | 1.85                 | 1.78                                |
| <b>PDB entry</b>                         | <b>5F7L</b>                     | <b>5F7K</b>                 | <b>5F7M</b>                                       | <b>5F7N</b>                                         | <b>5F7W</b>                                         | <b>5F7Y</b>                           | <b>5F8R</b>          | <b>5F8R</b>                         |

**Crystallographic data and statistics for structures presented in Figure 2, 3, 6 and 7**

|                                          | <b>A730:Nb-ER19</b><br><b>+ Le<sup>b</sup>6</b> | <b>A730:Nb-ER19</b><br><b>+ A6-1</b> | <b>P436:Nb-ER19</b><br><b>+ Le<sup>b</sup>6</b> | <b>P436:Nb-ER19</b><br><b>+ BLe<sup>b</sup>7</b> |
|------------------------------------------|-------------------------------------------------|--------------------------------------|-------------------------------------------------|--------------------------------------------------|
| <b>Data collection</b>                   |                                                 |                                      |                                                 |                                                  |
| Wavelength                               | 0.98                                            | 0.97                                 | 0.98                                            | 0.93                                             |
| Beamline                                 | PROXIMA-1                                       | I24                                  | I04                                             | IO4-1                                            |
| Space group                              | P 1 2 <sub>1</sub> 1                            | P 1 2 <sub>1</sub> 1                 | C 2 2 2 <sub>1</sub>                            | C 2 2 2 <sub>1</sub>                             |
| a, b, c (Å)                              | 103.2, 134.5, 124.0                             | 102.9, 134.9, 123.8                  | 124.0, 136.2, 124.6                             | 119.2, 135.1, 127.3                              |
| α, β, γ (°)                              | 90.0, 102.3, 90.0                               | 90.0, 102.5, 90.0                    | 90.0, 90.0, 90.0                                | 90.0, 90.0, 90.0                                 |
| Resolution range (Å)                     | 48.64-2.99 (3.16-2.99)                          | 67.46-2.62 (2.76-2.62)               | 51.54-2.44 (2.57-2.44)                          | 73.15-2.59 (2.66-2.59)                           |
| Total reflections                        | 447382 (56631)                                  | 558740 (82864)                       | 257262 (36479)                                  | 213485 (16651)                                   |
| Unique reflections                       | 65294 (8335)                                    | 98949 (14409)                        | 39582 (5717)                                    | 32091 (2365)                                     |
| CC(1/2)                                  | 99.6 (61.5)                                     | 99.7 (54.5)                          | 99.6 (70.2)                                     | 99.9 (65.7)                                      |
| R <sub>merge</sub> (%)                   | 18.0 (135.0)                                    | 11.3 (119.7)                         | 9.5 (93.0)                                      | 6.7 (116.2)                                      |
| R <sub>p.i.m.</sub> (%)                  | 7.4 (55.1)                                      | 5.2 (54.3)                           | 4.3 (43.5)                                      | 3.1 (50.9)                                       |
| Average I/σ                              | 9.9 (1.7)                                       | 9.6 (1.4)                            | 8.8 (1.7)                                       | 15.6 (1.7)                                       |
| Completeness (%)                         | 97.9 (86.1)                                     | 99.8 (99.9)                          | 100.0 (100.0)                                   | 99.5 (99.5)                                      |
| Multiplicity                             | 6.9 (6.8)                                       | 5.6 (5.8)                            | 6.5 (6.4)                                       | 6.7 (7.0)                                        |
| Wilson B-factor                          | 52.7                                            | 51.5                                 | 44.6                                            | 57.8                                             |
| <b>Refinement</b>                        |                                                 |                                      |                                                 |                                                  |
| R <sub>work</sub> /R <sub>free</sub> (%) | 18.11/23.38                                     | 19.06/23.69                          | 20.48/25.74                                     | 19.50/23.67                                      |
| average B-factor (Å <sup>2</sup> )       | 52.93                                           | 44.62                                | 40.8                                            | 58.4                                             |
| R.m.s. deviations                        |                                                 |                                      |                                                 |                                                  |
| Bond lengths (Å)                         | 0.012                                           | 0.014                                | 0.017                                           | 0.016                                            |
| Bond angles (°)                          | 1,535                                           | 1,677                                | 1,877                                           | 1,792                                            |
| No. Atoms (non H)                        |                                                 |                                      |                                                 |                                                  |
| Protein                                  | 16195                                           | 16305                                | 3971                                            | 3972                                             |
| Carbohydrate                             | 272                                             | 284                                  | 68                                              | 79                                               |
| Water                                    | 42                                              | 75                                   | 45                                              | 18                                               |
| <b>Ramachandran</b>                      |                                                 |                                      |                                                 |                                                  |
| Favoured (%)                             | 93.87                                           | 93.51                                | 96.39                                           | 95.98                                            |
| Allowed (%)                              | 5.61                                            | 5.14                                 | 3.23                                            | 3.07                                             |
| Ouliers (%)                              | 0.52                                            | 1.35                                 | 0.38                                            | 0.96                                             |
| <b>MolProbity score</b>                  |                                                 |                                      |                                                 |                                                  |
|                                          | 2.01                                            | 1.97                                 | 1.57                                            | 1.66                                             |
| <b>PDB entry</b>                         | <b>5F93</b>                                     | <b>5F97</b>                          | <b>5F9A</b>                                     | <b>5F9D</b>                                      |

**Table S3- related to Figures 1, 3: MS fingerprint of trypsinized native BabA 17875**

| Name | Peptide 1                                               | Peptide 2                                                          | Mass   | M/Z    | Charge |
|------|---------------------------------------------------------|--------------------------------------------------------------------|--------|--------|--------|
| CL1  | NSPAYQAVLLAINAAVGFWNVLGYAT<br>QCGGNANGQESTSSTTIFNNEPGYR | STSITCSLNR                                                         | 6414.0 | 1605.5 | 4      |
|      |                                                         |                                                                    |        | 1284.8 | 5      |
| CL2  | ENNGTVSVTYTYTCSGEGNDNCSK                                |                                                                    | 2570.0 | 1271.4 | 2      |
| CL3  | LDGVPDSAQALLAQASTLINTINTACP<br>YFSVTNK                  | LCQFTEEISAIQK                                                      | 4971.5 | 1659.1 | 3      |
|      |                                                         |                                                                    |        | 1244.9 | 4      |
|      |                                                         |                                                                    |        | 996.1  | 5      |
| CL4  | NFVTGFLATCNNK                                           | STAGTSGTQGSPPGTVTTQTFASGCAYVEQT<br>ITNLNNSIAHFGTQEQQIQAENIADTLVNFK | 7997.8 | 1601.6 | 5      |
|      |                                                         |                                                                    |        | 1334.7 | 6      |

MS fingerprints for analysis of disulfide connectivity were performed by ProtTech, Inc.

## SUPPLEMENTARY INFORMATION

### EXTENDED EXPERIMENTAL PROCEDURES

#### 1. Bacterial Strains and Culture conditions.

##### 1.1. Strains of *H. pylori*

The *H. pylori* reference strain CCUG 17875 (designated 17875) was used as standard strain and binds both ABO/Le<sup>b</sup> and sialylated antigens, such as sLe<sup>x</sup> (Mahdavi et al., 2002). The 17875*babA1A2* mutant with deletion mutations of the two *babA* alleles does not bind ABO/Le<sup>b</sup> but binds to sialylated antigens (Ilver et al., 1998). The 17875/Le<sup>b</sup> strain is a spontaneous mutant that binds ABO/Le<sup>b</sup> but has lost binding to sialylated antigens (Mahdavi et al., 2002). Strain J166, used for the *CL2* contraselection mutation, is a strain used for Rhesus macaque challenges and is *vacA* (s1), *babA* and *cagPAI* positive (Solnick et al., 2001). The J166Δ*babA::rpsLCAT* (described in section 2.8.) was used as control.

*H. pylori* S831 is a Spanish specialist strain and clone S831G is a spontaneous generalist derivative identified in this study. Strain P1Δ*babA* was used for shuttle vector complementation (described in section 2.8).

##### 1.2. Culture of *H. pylori*

*H. pylori* were grown on BD BBL Brucella agar (Becton, Dickinson and Company, MD, USA), supplemented with 10% of heat-inactivated calf serum (Svenska LabFab, Ljusne, Sweden), 1% Isovitox Enrichment (Dalynn Biologicals, Calgary AB, Canada) and antibiotic mixture (4 μg/μL amphotericin B, 5 μg/μL trimethoprim and 10 μg/μL vancomycin (Sigma Aldrich, St. Louis, MO, USA) under micro-aerophilic conditions (10% CO<sub>2</sub> and 5% O<sub>2</sub>) in mixed-gas incubator (Forma Scientific Inc., AB Ninolab, Väsby, Sweden) at 37°C.

#### 2. Nanobody generation, BabA native and recombinant procedures, protein expression and purification.

##### 2.1. Purification of native Le<sup>b</sup>-binding BabA.

Purification of native BabA from *H. pylori* was essentially as described by Bugaytsova *et al*, (in final preparation); briefly *H. pylori* 17875/Le<sup>b</sup> bacterial cells were suspended in N-dodecyl-N,N-dimethyl-3-ammonio-1-propanesulfate (ZW-12; Sigma-Aldrich, St Louis, MO, USA). The protein extract was subjected to ion exchange chromatography and BabA protein was eluted with a linear NaCl gradient, and fractions were assayed for the presence of BabA by immunoblotting with anti-BabA AK277 antibody (Odenbreit et al., 2002) (described in section 3.3). Pooled fractions were applied to a Sepharose 4 Fast flow matrix conjugated with Le<sup>b</sup> antigen (Isosep AB,

Tullinge, Sweden). BabA was eluted by a linear acid gradient. BabA purity was analyzed by SDS-PAGE and Coomassie staining.

## **2.2. Cloning, expression and purification of recombinant full-length BabA.**

The coding sequence for the mature BabA coding region (*babA2*) was PCR amplified from *H. pylori* strain CCUG 17875 and cloned into plasmid pASK-HR2, which has been generated by modification of pASK-Iba12 (Iba, GmbH) so that the OmpA leader sequence is replaced with the DsbA leader sequence and with the inclusion of a 6x His tag between the existing *StrepII*-tag and the thrombin cleavage site. For protein expression, an overnight pre-culture of *E. coli* Top10 transformed with pASK-HR2-BabA was inoculated in LB broth (1:100) supplemented with 100 µg/mL ampicillin and grown at 26 °C to an OD<sub>600</sub> 1 before induction with 0.2-µg/mL anhydrotetracycline. After 6 hours of induction, the cells were recovered, washed in TBS (20 mM Tris pH 8.0, 150 mM NaCl), weighed and stored at -80 °C. For BabA purification, cells were resuspended in TBS supplemented with 5 µM leupeptin and 1 mM AEBSF, 20 µg/mL deoxyribonuclease and 100 µg/mL lysozyme, lysed by a single passage in a Constant System Cell Cracker at 20 kPsi at 4 °C and debris was removed by centrifugation at 10.000g for 10 minutes. The supernatant underwent ultracentrifugation at 100.000g for 45 minutes. Inner membranes were selectively solubilized by resuspension of total membrane pellets in TBS with 0.5% (w/v) N-laurosarcosine, 5 µM Leupeptin and 1 mM AEBSF. Outer membranes were pelleted from the suspension by ultracentrifugation at 100.000g for 45 minutes and subsequently solubilized with 100 mL of 1 % (w/v) N-dodecyl-β-D-maltopyranoside (DDM) in 20 mM Tris pH 8.0, 500 mM NaCl, 5% (v/v) glycerol, 100 µg/mL lysozyme, 5 µM leupeptin and 1 mM AEBSF. Following a final ultracentrifugation step, the outer membrane extract was loaded at 4 °C on a 5 mL Ni-Sepharose 6 Fast Flow resin (GE Healthcare) equilibrated with 5 column volumes of 20 mM Tris pH 8.0, 500 mM NaCl, 5% (v/v) Glycerol, 0.03 % (w/v) DDM supplemented with 20 mM imidazole. The column was washed with 20 column volumes of the equilibration buffer and a linear gradient was applied from 20 to 500 mM imidazole. Elution fractions were further purified by affinity chromatography by using 5 mL Strepactin column (Iba GmbH) equilibrated with 20 mM Tris pH 8.0, 500 mM NaCl, 5% (v/v) Glycerol, 0.03 % (w/v) DDM, 1 mM EDTA and eluted with buffer A supplemented with 2.5 mM of desthiobiotin.

## **2.3. Generation and selection of anti-BabA llama single domain antibodies or nanobodies**

An alpaca was immunized 6 times at weekly intervals with Gerbu LQ 3000 adjuvant supplemented with 150 µg BabA purified from *H. pylori* strain 17875/Leb as a native, detergent-solubilized protein (see experimental procedures 2.1). The anti-BabA nanobody phage-display library was generated according to previously published methods (Ghahroudi et al., 1997). From the lymphocytes extracted from anti-coagulated blood of the immunized alpaca, cDNA was



prepared and used as template in a 2-step nested PCR that amplified the genes coding for the variable domains of the heavy-chain antibodies. The amplified pool of nanobody DNA fragments were ligated into a pHEN4 phagemid vector and transformed into *Escherichia coli* TG1 cells. A nanobody library of  $10^9$  transformants was generated, with 86% of the clones within the library containing a vector with the nanobody gene insert of the proper size, as determined by PCR. Next, the nanobody repertoire was expressed on M13 virions after infection with M13K07 helper phages and biopanning of phage particles expressing BabA-specific nanobodies was performed. After four consecutive rounds of selection on immobilized antigen, a clear enrichment of phage particles for BabA was observed. The third and fourth round of selection were also carried out at a lower pH (200 mM glycine solution at pH 4.5 and 2.5) than in the standard protocol. After the fourth round of selection, 428 colonies from the three different selection conditions were randomly chosen for expression of their nanobody as soluble protein. When the crude nanobody periplasmic extracts were tested in an ELISA, 345 out of the 428 extracts were shown to be specific towards BabA. Based on optical density measurements of the ELISA, 24 colonies from the second and third rounds of all three selection conditions were sent for DNA sequencing. 21 unique anti-BabA nanobody DNA fragments were re-cloned in the expression vector pHEN6 to contain a His<sub>6</sub> tag facilitating the purification of the recombinant nanobody and transformed into *E. coli* WK6 cells, where nanobodies are transported into the periplasm, upon expression. Nb-ER14 and Nb-ER19 were selected for use in structural studies on the basis of their stabilizing properties towards the BabA<sup>AD</sup> fragment (see extended experimental procedures 4.2).

#### **2.4. Expression and isolation of nanobodies Nb-ER14 and Nb-ER19**

Overnight precultures of *E. coli* WK6 Su- cells harboring the pHEN6 vector with insert encoding for either 6xHis-tagged Nb-ER14 or Nb-ER19 was used to inoculate lysogeny broth (LB) media (1:100) supplemented with 100 µg/mL ampicillin. Bacterial cells were grown at 37°C, induced at OD<sub>600</sub> of ~ 0.8 with 1.0 mM isopropyl β-D-1-thiogalactopyranoside (IPTG) and the cell cultures incubated overnight at 20°C while shaking. The cell pellets were harvested by centrifugation at 6238 rcf for 15 minutes at 4°C. Extraction of periplasmic proteins was performed by suspending every 1 g of wet cell pellet in 4 mL of 20 mM Tris-HCl pH 8.0, 20 % (w/v) sucrose buffer supplemented with protease inhibitors AEBSF-HCl (0.4 mM) and leupeptine (1 µg/mL). The mixture was left on ice for 20 minutes together with 5 mM EDTA and 17,560 U of lysozyme. MgCl<sub>2</sub> (40 mM final concentration) was then added and the periplasmic extract was collected by centrifugation at 17,418g for 20 minutes at 4°C.

#### **2.5. BabA<sup>AD</sup> expression, Nb complex formation and purification**

The cloning and expression of BabA<sup>AD</sup> as a stable, soluble BabA fragment are described in Subedi *et al.* (Subedi *et al.*, 2014). In the resulting expression plasmid (pASK-HR3-BabA<sup>25-460</sup>), the coding sequence for residues 25 to 460 of mature BabA (excluding the leader sequence) from *H. pylori* CCUG 17875 and a C-terminal 6xHis tag are cloned in a pASK-IBA12 derivative vector (pASK-HR3) in which the *ompA* leader sequence was replaced by the *dsbA* leader. For BabA<sup>AD</sup> expression, an overnight preculture of *E. coli* Top10 cells containing pASK-HR3-BabA<sup>AD</sup> was used to inoculate LB medium (1:100) supplemented with 100 µg/mL<sup>-1</sup> ampicillin. Bacterial cells were grown at 37°C while shaking until the cultures reached an OD<sub>600</sub> of ~ 0.5 upon which temperature was decreased to 20°C. At an OD<sub>600</sub> of 1.0 the bacterial cell cultures were induced with anhydrotetracycline (0.2 mg/L) for overnight expression at 20°C. Cells were harvested by centrifugation at 6238g for 15 minutes at 4°C and periplasmic extraction was performed as described above for Nb-ER19 or Nb-ER14.

The periplasmic extracts of BabA<sub>1-460</sub> and either Nb-ER14 or Nb-ER19 were mixed in a ratio of 5:1 (v/v) on ice, filtrated through a 0.45 µm filter and sodium chloride was added to a final concentration of 0.5 M prior to loading on a 5 mL pre-packed Ni-NTA column (GE Healthcare) equilibrated with buffer A (20 mM Tris-HCl pH 8.0, 0.5 M NaCl and 5 % (v/v) glycerol). The column was then washed with twenty-five bed volumes of buffer A and bound proteins were eluted with a linear gradient of 0-60 % buffer A supplemented with 500 mM imidazole. Fractions containing the protein complex, as determined in SDS-PAGE, were pooled and concentrated in a 10 kDa MW cutoff spin concentrator to a final volume of 500 µL. To remove excess unbound Nb and minor protein contaminants, the concentrated sample was injected onto the Hi-Prep™ 26/60 Sephacryl S-100 HR column (GE Healthcare) pre-equilibrated with a buffer containing 20 mM Tris-HCl pH 8.0, 150 mM NaCl and 5 % (v/v) glycerol. Fractions containing the BabA<sup>AD</sup>:Nb-ER19 complex were pooled and concentrated to a final concentration of 15-20 mg mL<sup>-1</sup> using a 10 kDa MW cutoff spin concentrator.

## **2.6. Production of selenomethionine labeled BabA<sup>AD</sup>:Nb-ER14**

To produce selenomethionine labeled BabA<sup>AD</sup> the methionine auxotrophic *E. coli* strain B843 was transformed with pASK-IbaH3-BabA<sup>AD</sup> and precultured in M9-based minimal media, comprised of SelenoMet Nutrient Mix (1:200; w/v) (Molecular Dimensions), SelenoMet Medium Base (1:50; w/v)(Molecular Dimensions), L-methionine (40 µg/mL) and ampicillin (100 µg/mL). The overnight culture was pelleted, resuspended in an equal volume 1x PBS and used to inoculate the above minimal medium (1:100 dilution) supplemented with L-selenomethionine (40 µg/mL culture)(Acros Organics) instead of L-methionine. Protein purification and Nb complex formation were performed as described for unlabeled protein (see above), but with the addition of 5 mM β-mercaptoethanol in the buffers used to prevent selenomethionine oxidation.

Prior to crystallization, the selenomethionine labeled BabA<sup>AD</sup> in complex with unlabeled Nb-ER19 was concentrated to a final concentration of 20 mg/mL using a 10 kDa MW cutoff spin concentrator.

### **2.7. Cloning and production of the BabA<sup>AD</sup> S831 DL1 graft mutant**

For the generation of BabA<sup>AD;DL1-S831</sup> the DL1 loop region of the generalist *H. pylori* strain CCUG 17875 (residues 198-208: SKKATGVSDQN) were substituted with the DL1 sequence of specialist *H. pylori* strain S831 (residues: LPKVTGVDNQN). Substitution of the DL1 coding sequences was performed using site directed, ligation independent mutagenesis (SLIM) as described by Chiu et al. (Chiu et al., 2004). Primers used are F<sub>T</sub>: TTGCCAAAAGTCACAGGTGTAGACAACCAAAACGGCGGAACCAA AAC, F<sub>S</sub>: GCGGGAACCAAAAC, R<sub>T</sub>: GTTTTGGTTGTCTACACCTGTGACTTTTGGCAAGCAGTTATCATTTCCC, and R<sub>S</sub>: GCAGTTATCATTTCCC. The PCR reaction mixture was subjected to DpnI cleavage to selectively digest the CpG methylated parent pASK-HR3-BabA<sup>25-460</sup> and was transformed into *E. coli* Top10. BabA<sup>AD;DL1-S831</sup> and its complex with Nb-ER19 were produced as described above for BabA<sup>AD</sup>.

### **2.8. Cloning and production of the BabA<sup>AD</sup> A730 and P436 CBD exchange mutants**

In order to generate BabA<sup>AD; ID-730</sup> and BabA<sup>AD; ID-P436</sup> the carbohydrate binding domain of the generalist *H. pylori* strain CCUG 17875 (residues 180-257) was exchanged for the CBD's of the Alaskan A/B specialist strain A730 and the Peruvian generalist strain P436. The creation of such hybrid BabA variants will have the advantage that any phenotypic changes are a function of the CBD only, and also this approach allows nanobody aided crystallization of the hybrids since the above described nanobodies have been shown to recognize the conserved BabA core domain. First the 17875 CBD was removed and a BamHI restriction site inserted between residues 179 and 258 by performing a standard PCR with primers F: GGCATCGGATCCGTTGTTTTCTTTGAGCG CGGGTAAGCC and R: ATCGCAGGATCCGCTCAAGCGCTCTTGGCGCAAGCG on template plasmid pASK-HR3-BabA<sup>25-460</sup>. The PCR reaction mixture was subjected to DpnI cleavage to selectively digest the CpG methylated parent plasmid and was transformed into *E. coli* Top10. Afterwards the resulting plasmid was cleaved with subsequently BamHI and RecJf restriction enzymes to create a linear blunt ended DNA fragment. Synthetic DNA corresponding to the CBD's of strains A730 and P436 (Gen9) was recombined into the linear DNA fragment with In-Fusion (Clontech). BabA<sup>AD; ID-730</sup> and BabA<sup>AD; ID-P436</sup> and their complexes with Nb-ER19 were produced as described above for BabA<sup>AD</sup>.

### **2.9. Creation of CL2 mutants by contraselection and shuttle vector mutagenesis**

To generate an isogenic mutant of strain J166 in which the BabA CL2 loop cysteines were mutated to Ala (eg. Cys189A/Cys197A), we used a contraselection procedure as was described (Dailidienne et al., 2006). Briefly *H. pylori* strain J166 was made streptomycin resistant by transformation of chromosomal DNA from a 26695 *rpsL* mutant strain previously described (Barrozo et al., 2013), obtaining J166Str<sup>r</sup>. Next, part of the *babA* promotor and the part of the ORF downstream of the CL2 region in the J166Str<sup>r</sup> strain were replaced with a two-gene *rpsLCAT* cassette plasmid, which encodes dominant streptomycin susceptibility (*rpsL*) and chloramphenicol resistance (*CAT*). The *rpsLCAT* cassette was amplified with forward primer *rpsL\_F\_SacI* (5'-AACGAGCTCGATGCTTTATAACTATGGATTAACAC-3') and reverse primer *C2-CatR\_BamHI* (5'-AACGGATCCTTATCAGTGCACAACTGGGAT-3'), and then ligated to J166 *babA* DNA for the "Left arm" with forward primer *HP0898F-NotI* (5'-AATGCGGCCGCCAAAGAAGCCAAGCTAGAAATCC-3') and reverse primer *BabAupR\_SacI* (5'-AACGAGCTCTTTGTTTCGTTTGGTGGTAAA-3'), and "Right arm" with forward primer *BabAF4\_BamHI* (5'-AACGGATCCGCGAGCAGCTCATTAACACC-3') and reverse primer *HP1243:1862L26\_Xho* (5'-AACCTCGAGTTGGTAGCTTTATCGTTGATGAAGTT-3'). The three pieces were cloned into a pBluescript vector and used to transform the J166Str<sup>r</sup> strain, making the strain sensitive to streptomycin but resistant to chloramphenicol. Thereafter a DNA fragment containing the *babA*-CL2 mutant gene was obtained by creating a "Left arm" with forward primer *HP0898:1029U23* (5'-TTGCACCCACAAAACCCGATTG-3') and reverse primer *J166\_BabA\_AlaR* (5'-GGCGTTATTATTCCCTTTTCCTGAGGCTGTGTA-3'), a "Right arm" with forward primer *J166\_BabA\_AlaF* (5'-AGCCTCAGGAAAAGGGAATAATAACGCCTC-3') and reverse primer *HP1243:1895L30* (5'-CCCACAGAAAGCTTGTGTTTTTGCCTAAG-3') and subsequently joining these two fragments in a PCR reaction with forward primer *HP0898:1037U20* (5'-CACAAAACCCGATTGGCAGT-3') and reverse primer *HP1243:1862L26\_Xho* (5'-AACCTCGAGTTGGTAGCTTTATCGTTGATGAAGTT-3'). This DNA fragment was used to transform the J166*rpsLCAT* strain, replacing the *rpsLCAT* cassette, making the strain streptomycin resistant once more, and thus obtaining the J166CL2 mutant.

Entire *babA* sequences in potential CL2 mutants were obtained by sequencing at MWG Operon, Germany using primers: *J166babA\_Seq4* (5'-CTTCTGACGTATGGACTTATGG-3'), *J166\_CysF* (5'-AGCCTCAGGAAAAGGGAATAATAACGCCTCGGAAC-3'), *J166\_CysR* (5'-GTTCCGAGGCGTTATTATTCCCTTTTCCTGAGGCT-3'), *NdeI\_O2babAF* (5'-GATCCATATGAAAAAACTCTTTTACTCTCTC-3'), *NdeI\_O2babAR* (5'-CAAGGCGGCCGCTTAATAAGCGAACACATAGTTCAAATAC-3'). The contraselection approach in J166 generally produced frequent random point mutations. Clone 33 referred to as J166CL2 held the correct gene sequence in the adhesion domain, with three non-silent point mutations outside our region of interest: Glu399Gly, Ile440Phe, Ser660Asn. As control, additional CL2 mutants in

J166 were made were either Cys residue was replaced with Ala and the entire BabA sequence was without additional mutations, which confirmed the non-binding phenotype. These strains were constructed with a chloramphenicol marker behind the *babA* gene, which proved less mutagenic, but not completely isogenic to the WT as the J166CL2 Clone 33, but verified the CL2 importance (data not shown). *H. pylori* strain P1Δ*babA* was genetically complemented with the shuttle vector (SV) pIB6 (Jiménez-Soto et al., 2013) containing insert *babA* and *babA-CL2* genes from strain 17875, essentially as described in Bugaytsova *et al.* (in preparation). GenScript USA Inc. performed *babA* DNA synthesis, Cys/Ala-mutagenesis and subcloning into the SV. Plasmid variants were introduced into the P1Δ*babA* strain via bacterial conjugation by using *E. coli* counterselection with diaminopimelic acid and kanamycin selection for the SV. The SV plasmid was re-isolated after introduction into P1Δ*babA* by using E.Z.N.A. Plasmid Mini Kit I (OMEGA Bio-tek) and sequencing to confirm correct insert was made at MWG Operon, Germany. Shuttle vector over-expression clones inherently vary in BabA expression and generally BabA expressing clones loose Leb-binding over time (our unpublished finding), e.g. P1Δ*babA* expressing the CL2 17875 *babA* showed between 27 % and 0.5 % binding (data not shown), an experiment of 9 % binding is shown in Figure 4B, where BabA levels of WT and CL2 17875 *babA* expressed at similar levels as judged by an immunoblot. The system is a compromise where qualitative binding properties of BabA-CL2 (as probed with SPR) can be performed (Figure 4C), but detailed quantification is not meaningful due to individual and time-dependent variation of the plasmid-based expression.

### **3. Protein and sample characterization**

#### ***3.1. Oligomerization of the BabA protein detected by in vivo cross-linking on H. pylori cells.***

For cross linking of BabA oligomers on the bacterial cell surfaces, *H. pylori* 17875/Leb cells were harvested after 24 h of incubation and first washed twice in PBS-Tween. Then, 1 mL of bacterial suspension ( $OD_{600} = 1.0$ ) was pelleted for 5 min at 5000*g* and re-suspended in 40 μL of citrate-phosphate buffer, pH 5.5. After 10 min of incubation at  $T_r$  (room temperature), 10 μL of the cell suspension was mixed with 10 μL of the citrate-phosphate buffer, pH 5.5 and 5 μL of 0.25% glutaraldehyde (Scharlau Chemie, EU). Sample was incubated at  $T_r$  for 10 min and then mixed with equal volume of 2 x Laemmli buffer under non-reducing conditions. Oligomerization was visualized by immunoblotting as described in 3.3.

#### ***3.2. Thermal denaturation assays***

Solutions of 7.5 μL of 300 x SYPRO Orange (Invitrogen), 5 μL of 2.5 mg/mL BabA<sup>AD</sup> or BabA<sup>AD</sup>:Nb-ER19 and 12.5 μL of buffer (20 mM Tris-HCl pH 8.0, 150 mM NaCl and 5 % (v/v)

glycerol) were added to the wells of a MicroAmp Optical 96-well Reaction Plate (Applied Biosystems). The plates were sealed with Microamp optical adhesive film (Applied Biosystems) and heated in a 7500 Real Time PCR System (Applied Biosystems) from 20 to 95 °C in increments of 1 °C. Fluorescence changes in the wells of the plate were monitored simultaneously and plotted against temperature. The wavelengths for maximal excitation and emission of the SYPRO orange are 470 and 570 nm, respectively.

### **3.3. Immunoblot**

Immunoblotting was performed essentially as described previously (Bäckström et al., 2004). Protein extracts were separated on SDS-PAGE using 7.5% Tris-HCl Ready Gels (Bio-Rad Laboratories, Hercules, CA, USA) or 4-12% Bis-Tris Ready Gels (Thermo Fisher Scientific, Life Technologies) followed by polyvinylidene difluoride (PVDF) membrane immunoblotting (Bio-Rad, USA). The membrane was blocked in 5% defatted milk in PBS-Tween followed by anti-BabA AK 277 antibody (1:6000) (Odenbreit et al., 2002) incubation and then probing with anti-rabbit-Ab-HRP (1:1000) (DakoCytomation, Denmark A/S). Signals were developed with ECL chemiluminescence (SuperSignal West Pico, Thermo Scientific/Pierce, IL, Rockford, USA) on High Performance Chemiluminescence film (GE Healthcare) Precision Plus Protein™ Prestained Standards (Bio-Rad Laboratories, Hercules, CA, USA) were used. In Figure S4F, *H. pylori* from strains J166 and J166CL2 were diluted in sample buffer for equal concentration after OD<sub>600</sub> measurement and extracts were either incubated for 30 min at 37°C (- -), treated with 5 % β-mercaptoethanol (+ -), 5 min boiling (- +) or both the later treatments (+ +). Samples were next subjected to SDS-PAGE and immunoblotting with AK277.

### **3.4. Mass spectrometry of Cys-loop connectivity in native BabA**

The protein identification and disulfide mapping of native BabA was carried out at ProtTech, Inc. by using the NanoLC-ESI-MS/MS peptide sequencing technology. In brief, native BabA purified from strain 17875/Leb was digested in-gel with sequencing grade modified trypsin. The resulted peptides mixture was analyzed by a LC-ESI-MS/MS system, in which a high performance liquid chromatography (HPLC) with a 75 micrometer inner diameter reverse phase C18 column was on-line coupled with an ion trap mass spectrometer. The mass spectrometric data acquired were used to map the protein sequence with ProtTech's proprietary software suite (www.ProtTech.com). For mapping disulfide connectivity, native babA was incubated with iodoacetamide and then dialyzed with MWCO 8,000 membrane overnight before digestion with sequencing grade modified trypsin. The resulted peptides mixture was analyzed by a LC-ESI-MS/MS system as above. The mass spectrometric data acquired were analyzed with ProtTech's proprietary S2MAP (version 1.3) software suite.

### **3.5. Mass spectrometry of N-acetylcysteine titration of BabA<sup>AD</sup>**

An N-acetyl-L-cysteine (NAC; Sigma-Aldrich) stock solution was prepared at 100 mg/mL in 50 mM sodium phosphate pH 7.0, 150 mM NaCl and the pH adjusted to 7.0. A two-fold dilution series of NAC was prepared and mixed in 1:1 volume ratio with 0.8 mg/mL BabA<sup>AD</sup> (50 mM phosphate pH 7.0, 150 mM NaCl). The protein solution was digested overnight at 37 °C by trypsin (sequencing grade modified trypsin, Promega) at a 1:25 trypsin/protein mass ratio. Before analysis by mass spectrometry, the samples were desalted on ZipTip C18 (Millipore) and eluted in 50% acetonitrile /1% formic acid (v/v). The samples were loaded into a nanoflow capillary (Thermo Scientific) and ESI mass spectra were acquired on a quadrupole time-of-flight instrument (Q-ToF Ultima, Waters) operating in the positive ion mode, equipped with a Z-spray nanoelectrospray source. Data acquisition was performed using a MassLynx 4.1 system. The reduction of the Cys189/Cys197 disulfide containing peptide Glu176-Lys199 was monitored by mass spectrometry by following the evolution of the intensity of the peaks at m/z 1271.03 and 1271.53, belonging to the isotopic distribution of the doubly-charged peptide in the oxidized form. The intensities of both peaks were normalized with respect to the most intense peak of the isotopic distribution. These peaks were chosen because of their measurable intensity in all the spectra and because these do not interfere with the isotopic distribution of the reduced form (see Figure S5B and S5C).

### **3.6. Trypsination of BabA in *H. pylori* J166 and J166CL2**

An overnight suspension of *H. pylori* strain J166 was adjusted to OD<sub>600</sub> of 0.5 and 200 µL was treated with 50 µg/mL trypsin (Invitrogen) for 2 and 30 minutes. The trypsination mix was then quenched by 100 µL fetal calf serum and immediately placed on ice. Bacterial cells were pelleted, resuspended in sample buffer and extracts were separated by SDS-PAGE and visualized by immunoblotting with antibody  $\alpha$ -BabA AK277 (Figure S4G).

### **3.7. Circular Dichroism (CD) measurements**

BabA<sup>AD</sup> samples in absence and presence of 100 mM tris(2-carboxyethyl)phosphine (TCEP) were prepared at a concentration of 3 mg/mL in a buffer containing 20 mM Tris pH 8.0, 150 mM NaCl and 5% glycerol. The samples were placed in a 0.1-mm path-length quartz cuvette in a J-715 spectropolarimeter (JASCO). For each sample, three scans were recorded between 250 and 190 nm at a scan speed of 20 nm min<sup>-1</sup> and averaged to obtain the CD profile. After CD analysis these samples were analyzed with SDS-PAGE in absence of any reducing agents in the loading dye.

## **4. Structure determination**

#### **4.1. Crystallization and structure determination of BabA<sup>AD</sup> complexes with Nb-ER14 and Nb-ER19**

Native and selenomethionine labeled BabA<sup>AD</sup>:Nb-ER14 complexes were concentrated to 20 mg/mL and crystallized by sitting drop vapor diffusion at 20 °C using 0.2 M Lithium sulfate, 0.1 M Sodium acetate 4.5, 50 % w/v PEG 400 as crystallization buffer. Data were collected at -196°C using loop-mounted BabA<sup>AD</sup>:Nb-ER14 crystals that were first flash-cooled in liquid nitrogen. Data for selenomethionine- and unlabeled BabA<sup>AD</sup>:Nb-ER14 crystals were collected at the Proxima-1 beamline (SOLEIL, Gif-sur-Yvette, France) at a 0.98 Å wavelength and integrated and scaled to, respectively, 3.17 and 2.75 Å resolution using the XDS package (Kabsch, 1993). Crystals are in space group P2<sub>2</sub>1<sub>2</sub>1 with unit cell dimensions a= 42.4 Å, b= 133.7 Å and c= 201.6 Å, corresponding to two BabA<sup>AD</sup> and two Nb-ER14 copies per asymmetric unit (AU). The unmerged data from the selenomethionine-labeled BabA<sup>AD</sup>:Nb-ER14 crystal were used for phase calculation using a single anomalous dispersion (SAD) methodology. For this, data normalization, location of 10 selenium atoms in the AU and phase calculation and density modification were performed using the programs SHELXC, SHELXD and SHELXE, respectively (Sheldrick, 2010). The structure factors for the unlabeled BabA<sup>AD</sup>:Nb-ER14 crystal were phased by molecular substitution with experimental and solvent flattened SAD phases and extended to 2.75 Å using the program DM (Cowtan, 1994; Winn et al., 2011). An initial model was build using the program ARP/wARP (Langer et al., 2008), followed by iterative cycles of manual rebuilding in the graphics program COOT (Emsley and Cowtan, 2004) and maximum likelihood refinement using Refmac5 (Murshudov et al., 2011; Winn et al., 2011), resulting in a final model holding two copies of the BabA<sup>AD</sup>:Nb-ER14 complex (comprising residues 57-459 and 1-121 for BabA<sup>AD</sup> and Nb-ER14, resp.) with an R and freeR factor of 21.49 and 26.49 %, resp. (See Table S1 for full processing and refinement statistics).

#### **4.2 Crystallization and structure determination of BabA<sup>AD</sup>:Nb-ER19, BabA<sup>AD</sup>; ID-730:Nb-ER19, BabA<sup>AD</sup>; ID-P436:Nb-Er19, BabA<sup>AD</sup>;S831-DL1:Nb-ER19 and their complexes with blood group antigens**

BabA<sup>AD</sup>:Nb-ER19, BabA<sup>AD</sup>; ID-730:Nb-ER19, BabA<sup>AD</sup>; ID-P436:Nb-Er19 and BabA<sup>AD</sup>;S831-DL1:Nb-ER19 were concentrated to 20 mg/mL and crystallized by sitting drop vapor diffusion at 20°C using 0.2M sodium nitrate, 0.1M Bis Tris propane pH 6.5 and 20% w/v PEG 3350 (for BabA<sup>AD</sup>:Nb-ER19 and its complexes with bg ligands); 0.1 M isopropanol, 0.1 M HEPES pH 7.5, 20% ethylene glycol and 10 % w/v PEG8000 (for BabA<sup>AD</sup>; ID-A730:Nb-ER19); 1 M Sodium acetate, 0.1 M Imidazole pH 8.0 (for BabA<sup>AD</sup>; ID-P436:Nb-ER19 in complex with HLeb6) or 0.2 M potassium thiocyanate, 0.1 M Bis Tris propane pH 7.5 and 20 % w/v PEG 3350 (for BabA<sup>AD</sup>;S831-DL1:Nb-ER19 and its Le<sup>b</sup>6 complex) as a crystallization buffer. Complexes of BabA<sup>AD</sup>:Nb-ER19 and BabA<sup>AD</sup>;S831-DL1:Nb-ER19



with the different blood group antigens (see table S1) were obtained by addition of 1 mM of the respective bg glycans prior to crystallization. Glycans used for co-crystallization are: bg A Le<sup>b</sup> pentasaccharide (ALe<sup>b</sup>5, Table S1) and bg A type 1 hexasaccharide (A6-1, Table S1), H Le<sup>b</sup> hexasaccharide (Leb6, Table S1), bg B Le<sup>b</sup> heptasaccharide (BLeb7, Table S1). Crystals were soaked in crystallization buffer supplemented with 15 % (v/v) glycerol, loop-mounted and flash-cooled in liquid nitrogen. Data were collected at 100 K at beamlines I04, I24 (Diamond Light Source, Didcot, UK) and Proxima 1 (SOLEIL, Gif-sur-Yvette, France; see Table S1 for details) and were indexed, processed and scaled using the XDS package (Kabsch, 1993). All crystals were in the P2<sub>1</sub> space group with approximate unit cell dimensions of a=51.0 Å, b=131.7 Å, c=123.5 Å and beta=95° (see Table S2 for details) and two copies of the BabA<sup>AD</sup>:Nb-ER19 complexes per AU. Phases were obtained by molecular replacement using the BabA<sup>AD</sup>:Nb-ER14 structure and the program phaser (McCoy et al., 2007; Winn et al., 2011). The models were refined by iterative cycles of manual rebuilding in the graphics program COOT (Cowtan, 1994; Winn et al., 2011) and maximum likelihood refinement using Refmac5 (Murshudov et al., 2011; Winn et al., 2011). Glycan ligands were refined using the standard geometry restraints incorporated in Refmac5. Table S2 summarizes the crystal parameters and data processing statistics for all the structures.

## 5. Binding assays

### 5.1 Bacterial cells and gastric mucosa tissues used for fluorescent microscopy tests.

*H. pylori* cells used in fluorescent microscopy studies were harvested after 24 h of incubation, washed three times in PBS-Tween and if needed were labeled by FITC (Sigma, St. Louis, MO) as described previously (Aspholm et al., 2006). Then, bacteria were re-suspended in 1 mL of SIA blocking buffer (1% of periodate oxidized BSA in PBS-Tween-20, pH 7.4) to OD<sub>600</sub> = 0.2. All gastric histo-tissue sections used in this study were obtained from a healthy patient donor with no gastric disease. Dako Fluorescent Mounting Medium (Dako North America., Inc. CA, USA) was applied to slides prior to the microscopy. Binding was digitalized by a Zeiss AXIOcam MRm microscope (Carl Zeiss AB, Stockholm, Sweden) with a 200x optical magnification and quantified with by Zeiss ZEN 2011 (*blue edition*) software.

### 5.2. Binding of nanobodies Nb-ER14 and Nb-ER19 to *H. pylori* cells

Nb-ER14 and Nb-ER19 were labeled with fluorescein isothiocyanate (Invitrogen) according to manufacturer's protocol. Excess of unreacted FITC dye was removed by a NAP-5 Sephadex G-25 column (GE Healthcare).

Suspensions of *H. pylori* strains 17875/Leb and 17875babA1A2 were pelleted by 5 min, 5000g and resuspended in 500 µl of SIA buffer. Cells were then mixed with 1µg/mL of either of the Nb-ER14 or Nb-ER19 FITC labeled nanobodies. Incubations were performed for 2 hours at T<sub>r</sub> in the

dark. The suspensions were centrifuged 5min, 5000g and the pellets were rinsed with PBS-0.05% Tween and then resuspended in 50µl of SIA buffer. Dako Fluorescent Mounting Medium was applied to 20 µl of the bacterial suspension and bound FITC-Nb-ER14 and FITC- Nb-ER19 were visualized by fluorescence microscopy (as described above in 5.1)

### **5.3. *In vitro* inhibition and detachment of *H. pylori* adherence to human gastric mucosa tissue by NAC.**

Suspensions of FITC labeled *H. pylori* strain 17875/Leb were mixed with a series of N-acetylcysteine (Acetylcystein, Meda, 200 mg/mL, solution for nebulizator, pH 7) dilutions prepared in SIA blocking buffer (0, 10, 20 and 100 mg/mL) or with 10 µg/mL of Leb-HSA conjugate (as positive control for inhibition of binding). Bacteria were incubated at 37 °C for 1 h and then applied to human gastric mucosa histo tissue sections for 2 hour. Unspecific binding was removed by PBS-Tween and slides were subjected to microscopy for digital quantification. The level of inhibition derived from number of remaining attached bacterial cells was visualized and quantified.

In the “detachment” regime (Figure 5A iv, v and vi), FITC labeled *H. pylori* strain 17875/Leb cells were applied to histo tissue sections at room temperature. After 2 h, nonadherent bacteria were removed by PBS-Tween and slides were incubated for 1 hour at 37 °C with a series of NAC dilutions prepared in SIA blocking buffer (10, 20, 100 and 200 mg/mL) or 10 µg/mL of Leb-conjugate. Slides were again washed in PBS-Tween and analyzed as described above in 5.1.

To asses the effect of NAC treatment on receptor availability in the human gastric mucosa histo tissue sections, sections were pre-incubated with a series of N-Acetylcysteine (Acetylcystein, Meda, 200 mg/mL, solution for nebulizator, pH 7) dilutions prepared in SIA blocking buffer (0, 10, 20, 100 and 200 mg/mL NAC) for 2 h at room temperature and then washed 3 times in PBS-Tween. Suspensions of FITC labeled *H. pylori* strain 17875/Leb were applied to NAC-(pre)treated sections and incubated for 1 hour (as above). Nonspecific binding was removed by PBS-Tween and slides were subjected to microscopy as described in 5.1.

### **5.4. Identification of *H. pylori* S831 generalist variants in the original stock smear of specialist strain S831.**

Suspensions of *H. pylori* strain 17875/Leb or strain S831 were centrifuged for 5 min at 5000g. Pellets were then resuspended in 200 µL of SIA blocking buffer and mixed with 2 µg of Alexa488 (green) labeled Leb-HSA or Alexa555 (red)-labeled ALeb-HSA conjugates. Fluorochromes Alexa Fluor 488 (Alexa488) and Alexa Fluor 455 (Alexa555) were both from Molecular probes, Life Technologies Corp., Oregon, USA). Leb- and ALeb-conjugates were fluoro-labeled as described

previously (Aspholm et al., 2006). After 2 hours of incubation at room temperature in darkness, the suspensions were centrifuged for 5 min at 5000g. The pellets were resuspended in 50  $\mu$ L of SIA blocking buffer, 15  $\mu$ L of the suspensions were then applied to microscope slide. Bacterial cells with bound fluorescent glyco-conjugate were counted manually whereas the numbers of non-labeled (non-binding) bacterial cells were estimated by phase contrast microscopy.

To determine the presence of residual S831 generalist derivatives, a colony screening was performed essentially as previously described by (Aspholm et al., 2006), with small modifications. Briefly, S831 wild-type *H. pylori* bacteria, diluted in Brucella broth, were cultured on tetrazolium-containing blood agar plates at 500-1.000 colonies per plate. Colonies were transferred onto nitrocellulose paper, washed 3 times with PBS-tween, and blocked over-night (ON) with 1.2% gelatin/0.5 % BSA in TBST (Tris-buffered saline and Tween 20). The next day, the blocking buffer was removed and membranes were incubated with biotinylated-ALe<sup>b</sup> (2 $\mu$ g/membrane) in blocking buffer for 2h at RT, washed 3 times with TBST and then incubated with streptavidin-POD (1:5,000; POD: horse radish peroxidase) for 1h at RT. Then the membrane was washed 3 times with TBST and developed with 4-chloro-1-Naphtol tablets (Sigma-Aldrich). The appearance of a dark spot on the membrane indicates a positive reaction, whereas if a spot appears red it indicates no binding (a negative Tetrazolium reaction). *H. pylori* strain 17875 (Ilver et al., 1998) and the 17875*babA1A2* mutant were used as positive and negative ALe<sup>b</sup> binding controls, respectively. The screening revealed 6 dark clones, i.e. generalist derivatives denoted S831G clones 1-6, and 3 red clones denoted S831S clones 1-3. RIA established binding properties as follows. S831G clones 1-6 bound Le<sup>b</sup> (%): 40.6, 39.3, 39.2, 35.6, 39.4, 38.8 (Mean=38.8) and bound ALe<sup>b</sup> (%): 16.8, 16.2, 15.6, 16.0, 18.2, 15.2 (Mean=16.3). S831S clones 1-3 bound Le<sup>b</sup> (%): 30.7, 22.4, 25.1 (Mean=26.1) and ALe<sup>b</sup> (%): 0.3, 0.3, 0.2 (Mean=0.3). Thus all S831G clones and S831S clones showed a most homogenous binding pattern. For comparison control strain 17875/Leb bound 33.1 % Le<sup>b</sup> and 27.7 % ALe<sup>b</sup>. Clones number 1 are shown in Figure 7D and F. Binding values for S831 were taken from Aspholm *et al.*, 2004. The *babA* genes from S831G clones 1 and 2 with generalist binding phenotype and S831S clones 1 and 2 with specialist binding phenotype were amplified and sequenced using *babA* gene loci specific primers according to (Colbeck et al., 2006).

### **5.5. Surface plasmon resonance (SPR) measurements**

SPR experiments on BabA<sup>AD</sup>, BabA<sup>AD;S831-DL1</sup> and full length recombinant BabA were carried out using a Biacore T200 instrument (GE healthcare). The surface of a CM5 sensor chip (GE healthcare) was activated with a 1:1 mixture of 0.1 M N-hydroxysuccinimide (NHS) and 0.4 M 1-ethyl-3-(3-dimethylaminopropyl) carbodiimide hydrochloride (EDC). After activation of the

surface the glycoconjugate of human serum albumin and Le<sup>b</sup> pentasaccharide in 10 mM sodium acetate, pH 4 was injected to flow cell 2 (FC2) to be immobilized on the sensor surface via remaining primary amine groups present on HSA. As a control the same amount of non-conjugated HSA was immobilized on FC1. Residual unreacted active ester groups were blocked with 1 M ethanolamine-HCl, pH 8.5. BabA<sup>AD</sup> was flown over the chip surface with concentrations ranging from 500 nM to 1 nM in HBS buffer (10 mM HEPES, 150 mM NaCl, 1 mM EDTA, 5 % (v/v) glycerol, 0.005 % Tween20, pH 7.4) at a flow rate of 20 µL/min at 25°C. To obtain binding dissociation profiles of the different BabA<sup>AD</sup> oligomeric states, the protein was run over a HiPrep 16/60 Sephacryl S100 (GE healthcare) size exclusion column equilibrated in HBS buffer and fresh fractions of both the oligomer and monomer peaks ((o) and (m), respectively (see Figure 1 and S1) were injected over the HSA-Le<sup>b</sup>5 coated surface.

For binding assessment of full-length recombinant BabA, DDM-solubilized BabA (residues 1-721) extracted from the *E. coli* outer membrane and purified as described above was dialyzed against a buffer containing 20 mM HEPES pH 7.5, 150 mM NaCl, 0.005 % (v/v) Tween-20, 0.05 % (w/v) DDM, 2 % (v/v) Glycerol. BabA concentration series ranging from 500 to 1 nM were injected over the surface for 30 min at a flow rate of 2 µL/min. Association and dissociation constants were fitted with the BIAevaluation software and using a 1:1 Langmuir binding model.

For the inhibition experiments of the S831 DL1 graft mutant BabA<sup>AD;S831-DL1</sup>, the protein was pre-incubating with Le<sup>b</sup>5 or ALe<sup>b</sup>5 (Elicityl, France) in a stepwise two-fold dilution series from 5 mM to 1 µM. After a 5 minute incubation, the respective mixtures were injected over the HSA-Le<sup>b</sup> coated CM5 chip for analysis of residual binding of BabA<sup>AD;S831-DL1</sup>.

Experiments with *H. pylori* P1Δ*babA::17875babA* and its isogenic *CL2* mutant (Cys189Ala/Cys197Ala) were performed on the ProteOn XPR36 (Bio-Rad, CA, USA) SPR-system. Here we used GLM chips (Bio-Rad) to immobilize Le<sup>b</sup>-HSA at pH 4.0 as described by the manufacturer. Bacterial cells were kept in PBS with 0.005 % Tween-20 and injected at 25°C using OD 0.2, 0.1 and 0.05 for 10 mins at flow rate 25 µl/min and 10 mins dissociation. The reference cell was coated with HSA-Lea (HSA-conjugated Lewis A), and was subtracted from the analysis flow cell.

### **5.6. Isothermal titration calorimetry**

ITC measurements were performed on a MicroCal iTC200 calorimeter (Malvern). In each case, BabA<sup>AD</sup> was used as a complex with the stabilizing Nb-ER19 to avoid protein aggregation due to stirring in the calorimeter cell. BabA<sup>AD</sup>:Nb-ER19 (70 µM) was loaded into the cell of the calorimeter and the Le<sup>b</sup> blood group antigens (eg. Le<sup>b</sup>5 or BLeb7, see above) were loaded in the syringe at 1.5 mM concentration. All measurements were done at 25°C, with a stirring speed of 420 rpm and performed in 20 mM HEPES buffer (pH 7.4), 150 mM NaCl, 5% (v/v) glycerol and

0.05% (v/v) Tween20. Binding data were analyzed using the MicroCal LLC ITC200 software. Aggregation problems due to stirring limited the upper range of concentrations of BabA<sup>AD</sup>:Nb-ER19 in the ITC cell, such ITC curves for low affinity (low mM to high  $\mu$ M range) interactions between BabA<sup>AD</sup>:Nb-ER19 variants and bg carbohydrates did not reach a plateau in the concentration range used. To allow convergence of the fitting algorithm, the N-value of the interaction fixed to 1. The unrestrained determination of N values in the high affinity ITC binding experiments between BabA<sup>AD</sup>:Nb-ER19 variants and bg carbohydrates demonstrated the correctness of this assumption.

### **5.7. Leb-binding activity of *H. pylori* strains analyzed by Radio Immuno Assay (RIA)**

The chloramine T method (Aspholm et al., 2006) was used to <sup>125</sup>I label HSA:Leb<sup>5</sup> conjugates (Le<sup>b</sup> conjugate) (IsoSep AB, Tullinge, Sweden). For a standard binding assay, 1 ng of <sup>125</sup>I HSA:Leb<sup>5</sup> conjugate (<sup>125</sup>I-Leb) was diluted with 300 ng cold Le<sup>b</sup> conjugate for improved equilibrium in binding, and in addition for test of binding capacity. This cocktail was applied to 1 mL of bacterial cells (OD<sub>600</sub> 0.1), samples were incubated for >1h to equilibrium and bacterial cells were pelleted by centrifugation. Counts per minute measurements of pellet vs. supernatant were carried out on a 2470 Wizard<sup>2</sup> Automatic Gamma counter (PerkinElmer, Waltham, MA, USA).

### **5.8. DTT and NAC titration of *H. pylori* and binding measurements by RIA**

All RIA were obtained essentially as described above. In Figure 4A two experiments were performed. In the first: *H. pylori* 17875 was: (1) first mixed with DTT in varying concentrations for 1h followed by resuspension in DTT-neutral buffer and addition of 1 ng hot <sup>125</sup>I-Leb conjugate mixed with 300 ng cold similar conjugate for a second hour, giving rise to the “pre-treatment” regime (dotted lines) or; (2) simultaneously mixed with both the <sup>125</sup>I-Leb conjugate and DTT for 1 hour (black line). In the second experiment: *H. pylori* 17875 was tested for reformation of CL2 bond and recovery of binding activity by removal and reconditioning of redox conditions, i.e. removal of reducing DTT agent. First, the bacterial suspensions were mixed with varying concentrations of DTT for 30 min. Bacteria were either resuspended in DTT-neutral buffer and incubated with the 1 ng hot and 300 ng cold <sup>125</sup>I-Leb-conjugate for 2 h or left in DTT during this time, just adding the conjugate mix for subsequent RIA-analysis. Experiment 1 and 2 were normalized and used to make up Figure 4A, where data points show the mean  $\pm$  s.d. ( $n=2$ ). In Figure 4C, 1 mL (OD<sub>600</sub>=0.1) samples of various *H. pylori* clinical isolates were RIA-tested for Leb-binding. Here samples were incubated for 1.5 h in DTT, and subsequently changed to DTT-neutral buffer and subjected to a normal RIA for 1 h. RIA binding data of the individual clinical isolates was normalized, with 0 mM DTT defined as 100% binding. Data points show the mean of two experiments. In Figure 5B, 1 mL (OD<sub>600</sub>=0.1) samples of *H. pylori* strain 17875 were tested

similarly by RIA for Leb-binding upon 1 h, 37°C pretreatment with Acetylcysteine (Acetylcystein, Meda, 200 mg/mL, solution for nebulizator, pH 7) in a concentration series from 0 to 50 mg/mL to determine the inhibition activity of NAC incubation on BabA mediated Leb<sup>b</sup> binding. Data points show the mean ± s.d. ( $n=3$ ).

### **5.9 RIA binding quantification of S831G generalist vs. S831S specialist clones**

In Figure 7F a competition experiment was performed where *H. pylori* S831G and S831S clone 1 ( $OD_{600}=0.1$ ) were incubated with increasing concentrations of non-radiolabeled ALeb<sup>b</sup> conjugate for 30 min and were next incubated with 1 ng radiolabeled <sup>125</sup>I-Leb-conjugate mixed with 300 ng non-radiolabeled Leb<sup>b</sup> conjugate for 17 h, pellet and supernatant were separated and cpm's counted as described above. Increasing concentrations of ALeb<sup>b</sup> titrates out 34.6% of the Leb<sup>b</sup> binding signal in the generalist clone compared to the control where no ALeb<sup>b</sup> was added. When saturated with ALeb, Leb<sup>b</sup> binding of the generalist clone becomes similar to that of the specialist clone, demonstrating the concomitant expression of the Locus A generalist and Locus B specialist *babA* variants in S831G. Values are means ± s.d.

## **6. Electron microscopy**

Grids with *H. pylori* J166CL2 obtained fresh from an overnight plate culture were incubated for 10 min with 10 µl of 1:100 dilution of α-BabA antibody AK253 (Yamaoka et al., 2002). This antibody was previously used to detect BabA on *H. pylori* cells in electron microscopy (Bäckström et al., 2004). After washing with 3 mL of Tris buffer (10 mM Tris, 10 mM MgCl<sub>2</sub>, pH 7.2) for 5 min on a plate shaker the secondary nanogold labeled anti-rabbit antibodies (GAR 10, BBI solutions) in a 1:20 dilution was added for 10 min. Negative staining was obtained with 2 % sodium silico-tungstate. Similar results were obtained with α-BabA antibody AK277 (Odenbreit et al., 2002), although with less staining as primary antibody was used in 1:600. In both experiments the CL2 mutant was strongly stained compared to the J166Wt and the J166Δ*babA*. Electron microscopy imaging was performed at Umeå Core Facility for Electron Microscopy (UCEM), Umeå University, Sweden.

## **7. NAC administration to *H. pylori* infected Leb-mouse, quantification of neutrophil mucosal infiltration and *H. pylori* infection load in epithelial proximity.**

All animal experiments were approved by the local ethical committee for animal studies at the Medical Faculty of Umeå University, Umeå, Sweden (Protocol number "A 23-13").

FVB/N mice transgenic for the human α-1,3/4 fucosyl-transferase gene (Falk et al., 1995) were used in this study. Only male mice of 6-8 weeks of age were selected and kept in individual cages on a 12 hour light-dark cycle with free access to food and water except the days of experimental

*H. pylori* challenge. Two hours prior to infectious challenge mice were starved and then oro-gastrically gavaged with  $2 - 5 \times 10^8$  (single passaged in mice) *H. pylori* strain J166 twice a week for 2 weeks. The following 2 weeks mice (25-30 grams) were administered Acetylcystein, Meda, dissolved in drinking water, 40 mg/day/animal similar to (Huynh et al., 2004). Clinically, NAC is administered to patients as 2 -4 times a 600 mg doses/day and is rapidly cleared:  $t_{1/2}$  of 2.27 h (Borgström et al., 1986). Here NAC was added to the drinking water, with much lower expected dose per drinking, therefore, relative to body weight, a higher dose of NAC (8 mg/mL for 5 mL per day) was supplemented. Animals were terminated week five; stomachs were harvested and longitudinally divided: one part was used for quantitative culturing of *H. pylori* and the other part was fixed in 4 % paraformaldehyde (PFA) and used for immunohistochemistry. Sentinel mice were routinely monitored as free from common murine pathogens and all animals were defined as specific pathogen free. To ensure transgenicity, all breeding couples were tested for the presence of the transgene as described by Falk *et al.* 1995.

To study neutrophil infiltration, five-micrometer-thick tissue sections were prepared from paraffin-embedded stomach tissue and used for immunodetection of neutrophils by the avidin-biotin-peroxidase complex method. Rat monoclonal antibody MCA771G (Serotec) detecting the murine Ly-6B.2 alloantigen was used as primary antibody. The secondary antibody was Goat anti-rat IgGAb (SC-2019; Santa Cruz Biotechnology). The sections were incubated with Vectastain Elite ABC Reagent and were visualized by a diaminobenzidine (DAB) reaction (Vector Laboratories). Images were taken with a DC300F digital camera attached to a Leica DMLB microscope. Neutrophils in each image were manually counted in three independent, equally sized fields, excluding the non-relevant tissue. The means of three fields produced the individual score for every mouse and the data presented in [Figure 5D](#) shows the means of 8 and 9 mice, for the control and NAC-treated groups respectively, with  $\pm 1SD$ . Group means were compared with the unpaired t-test with Welch's correction.

To quantify *H. pylori* infection, i.e. the infectious load as regard to those *H. pylori* bacterial cells that are found in close proximity to the epithelium, autopsy sections from NAC-treated and control-animals were blocked and probed with rabbit anti-*H. pylori* polyclonal antibodies (Agrisera, Sweden) and mouse monoclonal anti-Le<sup>b</sup> antibodies (Immucor Inc. CA, USA) overnight at 4°C. After washing (0.15 M NaCl, 0.05% (v/v) Tween-20) the secondary antibodies anti-rabbit IgG Alexa-488 (Invitrogen, USA) and anti-mouse IgG APC (Jackson-Immuno, USA) were applied for 2 hours, followed by counterstaining with 4',6'-Diamidino-2-Phenylindole (DAPI) (Sigma) and mounted using Dako Fluorescent Mounting Medium (Dako North America, Inc. CA, USA). The entire section of each mouse sample was digitized at 100x magnification with Zeiss

AXIOcam MRm microscope (Carl Zeiss AB, Stockholm, Sweden) by using Tile-mode settings. Images were taken with triple-channel fluorescent recording of Alexa-488 (Ex<sub>max</sub> 495 nm/Em<sub>max</sub> 519 nm), APC (Ex<sub>max</sub> 650 nm/Em<sub>max</sub> 660 nm) and DAPI (Ex<sub>max</sub> 350 nm/Em<sub>max</sub> 470 nm). Fluorochromes were scanned sequentially to eliminate spectral overlap between probes. Quantitative analysis of *H. pylori* located in the epithelial lining in the corpus and antrum areas of the tissue sections was performed. Each fluorescent tile-image was imported into Image J 2.0.0-rc-14/1.49g software (<http://rsbweb.nih.gov/ij/>). An intensity threshold was set to discriminate the detected bacterial population from the background. The number of bacteria was calculated by dividing the total area of the bacterial signal in one section by the averaged area of a single bacterium and expressed per micrometer of corpus and antrum epithelial lining. Data presented in Figure 5C shows the bacterial counts per animal per mm of immunostained gastric epithelium; horizontal lines represents the mean value per group of control ( $n=8$ ) and NAC-treated ( $n=9$ ) animals with  $\pm 1$  s.d.

#### SUPPLEMENTARY REFERENCES

- Barrozo, R.M., Cooke, C.L., Hansen, L.M., Lam, A.M., Gaddy, J.A., Johnson, E.M., Cariaga, T.A., Suarez, G., Peek, R.M., Cover, T.L., et al. (2013). Functional Plasticity in the Type IV Secretion System of *Helicobacter pylori*. *PLoS Pathog* 9, e1003189.
- Bäckström, A., Lundberg, C., Kersulyte, D., Berg, D.E., Borén, T., and Arnqvist, A. (2004). Metastability of *Helicobacter pylori* bab adhesin genes and dynamics in Lewis b antigen binding. *Proc Natl Acad Sci USA* 101, 16923–16928.
- Borgström, L., Kågedal, B., and Paulsen, O. (1986). Pharmacokinetics of N-acetylcysteine in man. *Eur J Clin Pharmacol* 31, 217–222.
- Chiu, J., March, P.E., Lee, R., and Tillett, D. (2004). Site-directed, Ligase-Independent Mutagenesis (SLIM): a single-tube methodology approaching 100% efficiency in 4 h. *Nucleic Acids Res* 32, e174.
- Colbeck, J.C., Hansen, L.M., Fong, J.M., and Solnick, J.V. (2006). Genotypic profile of the outer membrane proteins BabA and BabB in clinical isolates of *Helicobacter pylori*. *Infect Immun* 74, 4375–4378.
- Cowtan, K. (1994). “dm”: An automated procedure for phase improvement by density modification. *Joint CCP4 and ESF-EACBM Newsletter on Protein Crystallography* 31, 34–38.
- Dailidienne, D., Dailide, G., Kersulyte, D., and Berg, D.E. (2006). Contraselectable Streptomycin Susceptibility Determinant for Genetic Manipulation and Analysis of *Helicobacter pylori*. *Appl Environ Microbiol* 72, 5908–5914.
- Emsley, P., and Cowtan, K. (2004). Coot: model-building tools for molecular graphics. *Acta Crystallogr D Biol Crystallogr* 60, 2126–2132.
- Ghahroudi, M.A., Desmyter, A., Wyns, L., Hamers, R., and Muyldermans, S. (1997). Selection and



identification of single domain antibody fragments from camel heavy-chain antibodies. *FEBS Letters* *414*, 521–526.

Huynh, H.Q., Couper, R.T.L., Tran, C.D., Moore, L., Kelso, R., and Butler, R.N. (2004). N-acetylcysteine, a novel treatment for *Helicobacter pylori* infection. *Dig Dis Sci* *49*, 1853–1861.

Jiménez-Soto, L.F., Clausen, S., Sprenger, A., Ertl, C., and Haas, R. (2013). Dynamics of the Cag-type IV secretion system of *Helicobacter pylori* studied by bacterial co-infections. *Cell Microbiol* n/a–n/a.

Kabsch, W. (1993). Automatic processing of rotation diffraction data from crystals of initially unknown symmetry and cell constants. *J Appl Crystallogr* *26*, 795–800.

Langer, G., Cohen, S.X., Lamzin, V.S., and Perrakis, A. (2008). Automated macromolecular model building for X-ray crystallography using ARP/wARP version 7. *Nat Protoc* *3*, 1171–1179.

McCoy, A.J., Grosse-Kunstleve, R.W., Adams, P.D., Winn, M.D., Storoni, L.C., and Read, R.J. (2007). Phaser crystallographic software. *J Appl Crystallogr* *40*, 658–674.

Murshudov, G.N., Skubák, P., Lebedev, A.A., Pannu, N.S., Steiner, R.A., Nicholls, R.A., Winn, M.D., Long, F., and Vagin, A.A. (2011). REFMAC5 for the refinement of macromolecular crystal structures. *Acta Crystallogr D Biol Crystallogr* *67*, 355–367.

Odenbreit, S., Kavermann, H., Püls, J., and Haas, R. (2002). CagA tyrosine phosphorylation and interleukin-8 induction by *Helicobacter pylori* are independent from AlpAB, HopZ and Bab group outer membrane proteins. *Int J Med Microbiol* *292*, 257–266.

Sheldrick, G.M. (2010). Experimental phasing with SHELXC/D/E: combining chain tracing with density modification. *Acta Crystallogr D Biol Crystallogr* *66*, 479–485.

Winn, M.D., Ballard, C.C., Cowtan, K.D., Dodson, E.J., Emsley, P., Evans, P.R., Keegan, R.M., Krissinel, E.B., Leslie, A.G.W., McCoy, A., et al. (2011). Overview of the CCP4 suite and current developments. *Acta Crystallogr D Biol Crystallogr* *67*, 235–242.

Yamaoka, Y., Soucek, J., Odenbreit, S., Haas, R., Arnqvist, A., Borén, T., Kodama, T., Osato, M.S., Gutierrez, O., Kim, J.G., et al. (2002). Discrimination between Cases of Duodenal Ulcer and Gastritis on the Basis of Putative Virulence Factors of *Helicobacter pylori*. *J Clin Microbiol* *40*, 2244–2246.
